# Supplementary material
Source: publisher figshare collection journal article supplement (https://gsajournals.figshare.com/ndownloader/files/13491602)
Supplement: Supplementary file 1 [file 13491602]

## Sheet: Summary
	Up during Infection/ Up in Mutant	Up during Infection/ Down in Mutant	Down during Infection/ Up in Mutant	Down during Infection/ Down in Mutant
6 h	228	305	177	418
24 h	415	292	256	488
48 h	491	329	421	431
All Time points	105	75	20	43

## Sheet: Same Pattern at 6 24 & 48 h
Up during Infection/Up in Mutant
AFLA_ID	Description	6 h	24 h	48 h
AFLA_005990	hypothetical protein	1.66669	1.75228	2.34197
AFLA_008350	amine oxidase	1.47539	1.72401	3.36543
AFLA_009180	hypothetical protein	2.37461	4.5162	5.52108
AFLA_009190	efflux pump antibiotic resistance protein, putative	1.24248	4.41617	3.80018
AFLA_010140	UbiD family decarboxylase, putative	1.2117	3.25114	1.7787
AFLA_010680	hypothetical protein	1.607	1.81887	3.95298
AFLA_010690	vitamin H transporter, putative	2.19039	2.34035	2.28506
AFLA_010700	hypothetical protein	5.06445	4.72445	3.42703
AFLA_010710	hypothetical protein	6.65416	6.85863	1.95927
AFLA_010720	hypothetical protein	7.66894	6.0023	3.12119
AFLA_011050	hypothetical protein	1.84227	3.88051	6.04936
AFLA_011440	endoglucanase, putative	6.72065	6.89912	4.89509
AFLA_011970	MFS transporter, putative	1.5768	1.68754	1.29337
AFLA_014190	beta-glucosidase, putative	1.03241	4.04793	3.2081
AFLA_018460	conserved hypothetical protein	3.30275	2.41807	2.62276
AFLA_019560	hypothetical protein	3.09837	1.10481	1.53077
AFLA_020860	RTA1 domain protein, putative	2.95377	3.72614	4.57638
AFLA_023100	hypothetical protein	1.09438	1.50446	2.89587
AFLA_023490	alpha-amylase, putative	2.58029	1.65015	2.60903
AFLA_023500	extracellular conserved serine-rich protein	2.73414	2.23674	3.96375
AFLA_024210	cytochrome P450, putative	5.918	1.17862	3.93514
AFLA_025190	extracellular lipase, putative	1.7067	1.35067	1.84494
AFLA_027600	O-methyltransferase, putative	2.17234	2.16329	2.82645
AFLA_028280	symbiotic chitinase, putative	1.3453	2.89874	1.55594
AFLA_030060	MFS monocarboxylate transporter, putative	1.00067	1.9876	1.23118
AFLA_030090	conserved hypothetical protein	3.80873	2.10793	2.66457
AFLA_031920	hypothetical protein	3.24132	1.36626	2.07788
AFLA_040470	MFS transporter, putative	2.52588	3.40365	1.16693
AFLA_043310	hypothetical protein	2.31469	1.77168	2.16771
AFLA_043870	hypothetical protein	3.6507	2.32034	2.40314
AFLA_044250	hypothetical protein	3.63519	2.56305	1.61804
AFLA_045940	hypothetical protein	1.07438	2.80688	3.43038
AFLA_046110	hypothetical protein	4.30416	5.55557	5.61414
AFLA_046870	hypothetical protein	1.01236	2.14816	2.39075
AFLA_052120	hypothetical protein	2.00178	3.43425	3.80089
AFLA_053490	hypothetical protein	1.15515	1.46388	3.49535
AFLA_055270	hypothetical protein	1.10149	1.20294	1.04882
AFLA_057960	hypothetical protein	2.40333	2.15319	2.39261
AFLA_060310	alpha-glucosidase, putative	1.11811	2.77334	2.85395
AFLA_060410	short-chain dehydrogenase, putative	1.35611	1.96111	2.80853
AFLA_067860	tyrosinase, putative	1.21046	2.24741	2.69143
AFLA_069290	hypothetical protein	3.70283	3.67053	3.75532
AFLA_070040	MFS sugar transporter, putative	1.05346	2.70559	3.73648
AFLA_070090	hypothetical protein	3.2505	2.80297	2.68381
AFLA_072160	conserved hypothetical protein	1.56377	2.51472	2.67634
AFLA_073890	conserved hypothetical protein	2.08108	1.56043	3.20335
AFLA_073910	salicylate hydroxylase, putative	1.73131	1.66443	5.00675
AFLA_076410	conserved hypothetical protein	1.25619	2.26732	1.27511
AFLA_076730	conserved hypothetical protein	2.0367	5.10079	2.05606
AFLA_078930	conserved hypothetical protein	4.05698	1.62991	1.78704
AFLA_079360	PKS-like enzyme, putative	1.62145	3.77746	3.59066
AFLA_079390	hypothetical protein	3.75676	4.68398	3.01651
AFLA_080940	P-type ATPase, putative	1.61089	1.0863	3.86343
AFLA_082210	conserved hypothetical protein	1.05781	2.11263	4.83825
AFLA_082790	conserved hypothetical protein	3.41625	2.19067	1.5197
AFLA_084290	conserved hypothetical protein	9.54804	8.02165	3.56249
AFLA_085950	alcohol dehydrogenase, putative	3.32743	6.01833	5.05436
AFLA_087940	conserved hypothetical protein	1.39692	1.3352	1.49654
AFLA_089410	hypothetical protein	4.80512	3.51829	1.27992
AFLA_091500	beta galactosidase, putative	2.25178	4.42987	4.70972
AFLA_091960	hypothetical protein	1.68167	4.79602	3.43133
AFLA_092050	hypothetical protein	1.13995	1.91255	3.54867
AFLA_093830	AMP dependent ligase/synthetase, putative	3.70336	1.12766	1.69278
AFLA_094440	spherulin 4-like cell surface protein, putative	1.27976	1.80539	2.17705
AFLA_095960	chitin synthase D	1.76602	3.62999	5.0754
AFLA_096130	hypothetical protein	11.1615	9.68416	4.92634
AFLA_099550	hypothetical protein	2.07793	2.28893	2.64231
AFLA_099970	thiol methyltransferase, putative	3.3771	2.20938	4.6885
AFLA_100420	amidase, putative	3.62792	3.74744	5.55349
AFLA_101330	hypothetical protein	4.07676	2.52219	1.3814
AFLA_102660	hypothetical protein	1.58916	1.75766	2.22166
AFLA_104570	hypothetical protein	1.9499	2.54176	4.37877
AFLA_104820	cytochrome P450 monooxygenase, putative	1.80552	4.61861	3.06563
AFLA_104840	tannase, putative	2.2245	4.59484	1.78377
AFLA_104850	siderophore iron transporter, putative	2.64983	2.41514	1.91801
AFLA_104920	cutinase, putative	4.76921	1.26497	2.58103
AFLA_105500	hypothetical protein	1.43918	1.39062	1.52475
AFLA_106450	GPI anchored CFEM domain protein	1.09163	1.37454	3.90031
AFLA_106660	hypothetical protein	1.20346	4.11508	1.16295
AFLA_107680	hypothetical protein	1.02315	2.57652	2.09191
AFLA_109440	long-chain-fatty-acid-CoA ligase, putative	2.20025	3.47974	4.23975
AFLA_112870	monooxygenase, putative	1.37858	1.40294	1.17509
AFLA_113540	hypothetical protein	2.85991	1.21951	1.78057
AFLA_116000	phytanoyl-CoA dioxygenase family protein	3.36172	1.68734	1.72661
AFLA_116010	hypothetical protein	3.91382	6.6054	4.49707
AFLA_116770	extracellular lipase, putative	1.67637	1.53124	4.28388
AFLA_118020	hypothetical protein	1.46825	1.75342	2.34776
AFLA_119690	hypothetical protein	2.20976	3.9808	3.12285
AFLA_119860	pectin lyase, putative	1.12419	3.07946	1.33733
AFLA_120050	integral membrane protein	1.81064	2.46077	2.14287
AFLA_121730	alpha-galactosidase C, putative	1.35974	3.74541	2.88123
AFLA_121970	pectate lyase, putative	4.85499	2.94837	4.78379
AFLA_122510	ABC multidrug transporter, putative	1.9207	1.59527	1.42313
AFLA_124340	hypothetical protein	2.78267	1.66364	2.75588
AFLA_125900	metalloproteinase, putative	4.68358	2.2342	2.33475
AFLA_126780	beta-glucosidase 2 precursor, putative	1.52604	6.76268	5.80659
AFLA_127090	polyketide synthase, putative	1.49752	1.61145	2.81042
AFLA_127780	hypothetical protein	1.27232	1.73062	1.36345
AFLA_128210	protein kinase, putative	1.94027	1.13024	2.46991
AFLA_129380	cytochrome P450, putative	1.95316	4.1093	2.61016
AFLA_131610	cytidine deaminase, putative	2.29187	2.80629	1.47804
AFLA_132060	hypothetical protein	3.2625	2.31435	3.85303
AFLA_132430	polyglutamate biosynthesis protein, putative	1.92678	3.11095	2.81622
AFLA_136380	hypothetical protein	3.84684	2.49613	3.08941
AFLA_138170	exopolygalacturonase precursor, putative	4.178	1.76723	1.66236
Up during Infection/Down in Mutant
AFLA_ID	Description	6 h	24 h	48 h
AFLA_005070	alcohol dehydrogenase, putative	-1.03166	-1.6005	-1.1316
AFLA_005390	hypothetical protein	-3.59302	-2.62559	-1.75533
AFLA_007640	hypothetical protein	-4.43939	-5.54446	-3.5406
AFLA_013270	conserved hypothetical protein	-8.94866	-5.74376	-4.75418
AFLA_013470	flavin-containing amine oxidasedehydrogenase, putative	-1.16396	-1.44994	-2.94499
AFLA_014890	hypothetical protein	-5.20096	-6.98678	-3.23582
AFLA_015710	conserved hypothetical protein	-1.34982	-3.94208	-2.43064
AFLA_015830	MFS efflux transporter, putative	-1.96312	-2.99124	-1.57279
AFLA_017450	hypothetical protein	-1.6012	-1.89451	-2.04321
AFLA_019350	conserved hypothetical protein	-4.0788	-1.39122	-2.49024
AFLA_019440	conserved hypothetical protein	-3.2997	-2.68044	-1.7198
AFLA_023000	Ankyrin domain protein	-5.1195	-4.77984	-1.51952
AFLA_023010	GA4 desaturase family protein	-4.67239	-3.5529	-1.47481
AFLA_031040	conserved hypothetical protein	-3.06672	-2.37452	-7.54635
AFLA_040060	TPR domain protein	-1.90538	-1.35172	-1.02848
AFLA_040800	hypothetical protein	-5.73417	-6.30294	-6.90799
AFLA_042900	hypothetical protein	-10.112	-8.12831	-6.00726
AFLA_045600	cyclohexanone monooxygenase, putative	-5.28843	-4.77493	-3.31055
AFLA_053160	hypothetical protein	-3.01673	-3.33117	-7.95938
AFLA_053170	methylenetetrahydrofolate dehydrogenase, putative	-4.4941	-2.98198	-8.02673
AFLA_054320	NPP1 domain protein, putative	-1.98944	-2.07824	-1.94909
AFLA_059610	hypothetical protein	-2.09204	-1.98688	-2.44828
AFLA_059820	hypothetical protein	-2.05142	-1.87032	-2.00316
AFLA_060210	hypothetical protein	-3.64392	-1.00879	-2.57649
AFLA_064900	hypothetical protein	-2.29282	-3.43662	-2.81113
AFLA_066090	hypothetical protein	-2.23764	-1.3497	-1.52735
AFLA_066590	hypothetical protein	-1.30394	-2.80919	-2.67552
AFLA_066720	nonribosomal peptide synthase, putative	-2.93876	-6.78588	-2.36083
AFLA_069320	ABC multidrug transporter, putative	-2.90898	-2.06972	-1.81988
AFLA_070910	aminotransferase, putative	-5.8152	-2.53449	-5.33535
AFLA_074760	alkyl/aryl-sulfatase BDS1, putative	-2.66265	-2.70244	-6.54985
AFLA_074770	hypothetical protein	-2.16997	-3.5734	-5.53994
AFLA_074800	integral membrane protein	-1.09848	-1.57218	-2.96196
AFLA_077910	alpha-1,3-glucanase, putative	-4.63499	-7.1302	-1.85997
AFLA_079550	group II pyridoxal-5-phosphate decarboxylase, putative	-2.42018	-2.70409	-2.57526
AFLA_090560	hypothetical protein	-1.57172	-2.30515	-8.09541
AFLA_095770	WD domain, G-beta repeat protein	-4.05027	-4.80915	-2.30353
AFLA_104940	hypothetical protein	-4.53058	-6.45185	-1.65936
AFLA_106040	hypothetical protein	-1.12941	-3.69615	-5.15035
AFLA_107800	exo-beta-1,3-glucanase, putative	-2.21809	-2.84403	-1.42212
AFLA_110260	flavin-binding monooxygenase-like protein	-3.49322	-2.47587	-1.70427
AFLA_111280	hypothetical protein	-3.14983	-2.3908	-1.29231
AFLA_114710	hypothetical protein	-5.91761	-1.84981	-1.73448
AFLA_116650	pectate lyase, putative	-3.32929	-3.42954	-2.38247
AFLA_116680	white collar, putative	-1.61439	-2.98383	-1.85739
AFLA_117670	glycosyl transferase, putative	-7.63922	-5.4115	-3.52329
AFLA_118400	hypothetical protein	-6.96545	-3.15211	-1.09979
AFLA_119090	oxidoreductase, short chain dehydrogenase/reductase family, putative	-3.4021	-1.8524	-1.14645
AFLA_120790	MFS transporter, putative	-1.56745	-2.71317	-3.47332
AFLA_122400	glucan 1,4-alpha-glucosidase, putative	-6.43211	-2.88259	-2.85723
AFLA_124870	hypothetical protein	-1.96184	-1.12198	-1.75414
AFLA_124970	ankyrin repeat containing protein	-4.75753	-2.81467	-4.1894
AFLA_125000	bicyclomycin resistance protein, putative	-4.59196	-2.78096	-1.9962
AFLA_125280	hypothetical protein	-2.37023	-7.09684	-7.99505
AFLA_125800	hypothetical protein	-3.51189	-1.99655	-1.8204
AFLA_126200	hypothetical protein	-4.2484	-2.89223	-2.95266
AFLA_126390	oxidoreductase 2-nitropropane dioxygenase family, putative	-3.3526	-2.09763	-2.5667
AFLA_126530	hypothetical protein	-5.17796	-6.87976	-6.29713
AFLA_133810	hypothetical protein	-1.39312	-2.59549	-4.31279
AFLA_137120	integral membrane protein	-1.25524	-1.59848	-1.66798
AFLA_138310	hypothetical protein	-3.66601	-6.97899	-5.73575
AFLA_139140	aflYa/ nadA/ NADH oxidase	-8.31168	-11.3737	-3.66604
AFLA_139150	aflY/ hypA/ hypP/ hypothetical protein	-9.11376	-10.5561	-2.56769
AFLA_139160	aflX/ ordB/ monooxygenase/ oxidase	-7.32322	-10.3409	-2.34455
AFLA_139170	aflW/ moxY/ monooxygenase	-9.21969	-11.3708	-2.27642
AFLA_139180	aflV/ cypX/ cytochrome P450 monooxygenase	-10.1501	-11.1298	-3.16739
AFLA_139200	aflQ/ ordA/ ord-1/ oxidoreductase/ cytochrome P450 monooxigenase	-9.56199	-10.6636	-4.29061
AFLA_139220	aflO/ omtB/ dmtA/ O-methyltransferase B	-8.01939	-10.9727	-2.94881
AFLA_139260	aflG/ avnA/ ord-1/ cytochrome P450 monooxygenase	-8.3106	-12.0144	-3.05019
AFLA_139320	aflJ/ estA/ esterase	-7.34831	-10.5804	-2.0158
AFLA_139340	aflS/ pathway regulator	-4.00972	-5.01962	-1.37733
AFLA_139360	aflR / apa-2 / afl-2 / transcription activator	-6.93292	-5.75199	-5.3899
AFLA_139390	aflD / nor-1 / reductase	-7.50028	-10.1243	-1.37734
AFLA_139400	aflCa / hypC / hypothetical protein	-8.74388	-12.3142	-1.99184
AFLA_139470	FAD dependent oxidoreductase, putative	-9.89534	-8.44066	-6.2575
Down during Infection/Up in Mutant
AFLA_ID	Description	6 h	24 h	48 h
AFLA_001020	cytochrome P450 monooxygenase, putative	2.16261	1.7808	0.733469
AFLA_011040	hypothetical protein	2.16926	3.11065	4.67222
AFLA_012940	sulfatase, putative	1.65893	1.77896	1.80644
AFLA_037280	hypothetical protein	3.55106	1.4029	2.41131
AFLA_041150	cenp-B, putative	1.97274	4.7627	5.32586
AFLA_059980	choline dehydrogenase, putative	1.08451	1.09393	2.37558
AFLA_073390	3-oxoacyl-[acyl-carrier-protein] reductase, putative	2.01324	1.06688	1.84366
AFLA_078350	conserved hypothetical protein	2.95157	2.49158	3.04234
AFLA_079380	NRPS-like enzyme, putative	2.00098	2.80317	2.94002
AFLA_081990	conserved hypothetical protein	1.51682	2.89707	1.9847
AFLA_097610	gluconolactonase precursor, putative	3.91795	3.86706	5.00004
AFLA_097650	hypothetical protein	2.49683	3.54365	2.85734
AFLA_098840	L-amino acid oxidase, putative	1.13999	2.35606	3.70958
AFLA_098910	hypothetical protein	1.56445	1.6384	3.63795
AFLA_108710	quinone oxidoreductase, putative	1.03022	1.37594	3.71207
AFLA_109150	C2H2 finger domain protein (Ezf), putative	1.72648	1.29982	1.98614
AFLA_117900	thermolabile L-asparaginase, putative	2.02367	1.60929	4.68865
AFLA_118030	hypothetical protein	1.4818	1.33905	3.6357
AFLA_127290	zinc metallopeptidase, putative	2.76276	1.66124	2.17273
AFLA_138240	mannan endo-1,6-alpha-mannosidase DCW1 precursor, putative	7.19967	6.26346	7.33524
Down during Infection/Down in Mutant
AFLA_ID	Description	6 h	24 h	48 h
AFLA_000330	Ankyrin domain protein	-1.59526	-3.44023	-1.4344
AFLA_000350	NAD dependent epimerase/dehydratase, putative	-2.50906	-3.26813	-1.74421
AFLA_005130	L-lysine 2,3-aminomutase, putative	-1.05001	-5.01269	-1.83925
AFLA_011210	hypothetical protein	-2.62147	-2.34405	-3.60212
AFLA_011220	glucose dehydrogenase, putative	-2.68756	-1.53063	-2.53824
AFLA_014110	conserved hypothetical protein	-1.88612	-1.17613	-1.09255
AFLA_015820	hypothetical protein	-1.34131	-2.289	-1.85308
AFLA_019180	CipC-like antibiotic response protein, putative	-1.37289	-1.24429	-3.07977
AFLA_019510	conserved hypothetical protein	-1.27855	-4.83234	-5.9688
AFLA_023780	alcohol dehydrogenase, putative	-3.48025	-5.76792	-2.22924
AFLA_024090	efflux pump antibiotic resistance protein, putative	-5.70495	-3.68565	-2.27833
AFLA_024100	conserved hypothetical protein	-5.10603	-5.50549	-3.49558
AFLA_032930	conserved hypothetical protein	-1.51712	-2.04639	-3.09069
AFLA_039220	cytochrome P450, putative	-1.88834	-4.77724	-2.03518
AFLA_039230	short-chain dehydrogenase, putative	-2.24682	-3.53969	-2.51593
AFLA_039240	aristolochene synthase, putative	-1.47036	-4.99347	-3.4574
AFLA_039250	hypothetical protein	-3.83293	-4.11722	-2.90786
AFLA_039400	extracellular guanyl-specific ribonuclease RntA	-2.24751	-1.75357	-3.57786
AFLA_039520	hypothetical protein	-2.19918	-3.15712	-3.78841
AFLA_041350	sulfonylurea receptor/ ABC transporter, putative	-1.29648	-1.07921	-1.07239
AFLA_042180	hypothetical protein	-3.49192	-5.17912	-2.67032
AFLA_045520	integral membrane protein	-1.00364	-1.64453	-5.77249
AFLA_057500	hypothetical protein	-3.38119	-2.81743	-4.95204
AFLA_057580	hypothetical protein	-1.3331	-2.3178	-2.7755
AFLA_058890	oxidoreductase, putative	-2.33744	-6.0257	-2.52195
AFLA_059000	pantothenate transporter, putative	-3.7986	-2.4421	-4.17848
AFLA_059250	class II aldolase/adducin domain protein	-1.42248	-1.54584	-1.32521
AFLA_061070	hmg-CoA reductase, putative	-1.09884	-6.8629	-4.94323
AFLA_061110	mono- and diacylglycerol lipase precursor, putative	-6.12207	-6.35093	-5.36803
AFLA_064440	transport protein, putative	-6.69311	-3.70877	-7.73436
AFLA_078040	(S)-2-haloacid dehalogenase IVA, putative	-5.78791	-4.72915	-2.35643
AFLA_081770	conserved hypothetical protein	-4.0231	-5.49451	-4.77605
AFLA_089500	plasma membrane calcium-transporting ATPase, putative	-2.52634	-1.48716	-2.84913
AFLA_089510	vacuolar calcium ion transporter, putative	-2.65635	-1.03926	-2.95944
AFLA_104510	methyltransferase family protein	-3.2576	-1.19208	-2.12075
AFLA_104800	hypothetical protein	-1.90589	-1.32767	-1.32823
AFLA_108280	hypothetical protein	-2.37106	-3.98313	-2.28959
AFLA_109220	C6 transcription factor, putative	-2.80213	-3.60822	-2.43429
AFLA_119150	hypothetical protein	-1.40433	-7.11342	-5.07597
AFLA_126710	polyketide synthase, putative	-2.10224	-2.33953	-2.62921
AFLA_131920	hypothetical protein	-3.0333	-1.26229	-3.15594
AFLA_137850	hypothetical protein	-2.96679	-3.15137	-2.84594
AFLA_138790	hypothetical protein	-1.52748	-7.18891	-7.79446

## Sheet: Up in Infection hbx1 6 h 
AFLA ID	Description	6 h
AFLA_000360	hypothetical protein	-1.97205
AFLA_000530	hypothetical protein	-1.0441
AFLA_000590	hypothetical protein	-1.4619
AFLA_000790	hypothetical protein	1.4096
AFLA_001380	hypothetical protein	-2.2248
AFLA_001520	hypothetical protein	-1.77699
AFLA_001820	hypothetical protein	-2.49277
AFLA_002030	MFS monocarboxylate transporter, putative	-1.57592
AFLA_002850	calcium binding protein Caleosin, putative	-1.35608
AFLA_004510	peroxidase, putative	1.10946
AFLA_004660	glycogen synthase Gsy1, putative	-1.04096
AFLA_004690	hypothetical protein	-2.33178
AFLA_004810	nuclear pore glycoprotein p62, putative	-2.91125
AFLA_005020	hypothetical protein	-2.41264
AFLA_005070	alcohol dehydrogenase, putative	-1.03166
AFLA_005090	hypothetical protein	-2.3658
AFLA_005390	hypothetical protein	-3.59302
AFLA_005560	integral membrane protein, putative	-1.31584
AFLA_005740	C6 transcription factor, putative	-1.03342
AFLA_005990	hypothetical protein	1.66669
AFLA_006450	adenylate kinase 3, putative	2.07083
AFLA_006760	integral membrane protein, putative	-2.50421
AFLA_007640	hypothetical protein	-4.43939
AFLA_007720	pectin lyase	3.1631
AFLA_007760	flavin-binding monooxygenase-like protein	-1.03111
AFLA_008190	hypothetical protein	-1.05455
AFLA_008350	amine oxidase	1.47539
AFLA_008550	hypothetical protein	-1.00154
AFLA_008760	multidrug resistance protein, putative	-1.00802
AFLA_008770	nonribosomal peptide synthase, putative	-5.60526
AFLA_008860	hypothetical protein	-1.60729
AFLA_009180	hypothetical protein	2.37461
AFLA_009190	efflux pump antibiotic resistance protein, putative	1.24248
AFLA_009280	hypothetical protein	-1.3703
AFLA_009610	hypothetical protein	-1.09516
AFLA_010000	polyketide synthase, putative	-2.86267
AFLA_010140	UbiD family decarboxylase, putative	1.2117
AFLA_010180	hypothetical protein	-2.89618
AFLA_010600	siderophore biosynthesis acetylase AceI, putative	1.47669
AFLA_010680	hypothetical protein	1.607
AFLA_010690	vitamin H transporter, putative	2.19039
AFLA_010700	hypothetical protein	5.06445
AFLA_010710	hypothetical protein	6.65416
AFLA_010720	hypothetical protein	7.66894
AFLA_010820	hypothetical protein	-2.4575
AFLA_010830	hypothetical protein	-3.94953
AFLA_010980	maltase MalT	-2.76504
AFLA_011050	hypothetical protein	1.84227
AFLA_011370	hypothetical protein	-1.66201
AFLA_011440	endoglucanase, putative	6.72065
AFLA_011970	MFS transporter, putative	1.5768
AFLA_012920	conserved hypothetical protein	-2.07197
AFLA_012980	conserved hypothetical protein	-1.10375
AFLA_013040	conserved hypothetical protein	-1.09552
AFLA_013100	conserved hypothetical protein	-1.95226
AFLA_013270	conserved hypothetical protein	-8.94866
AFLA_013470	flavin-containing amine oxidasedehydrogenase, putative	-1.16396
AFLA_013480	conserved hypothetical protein	-2.15636
AFLA_013640	hypothetical protein	-10.404
AFLA_013650	allantoate permease, putative	-1.57485
AFLA_013780	conserved hypothetical protein	1.7388
AFLA_013880	lipase 2 precursor, putative	-5.13283
AFLA_014190	beta-glucosidase, putative	1.03241
AFLA_014820	conserved hypothetical protein	-1.08442
AFLA_014860	porphobilinogen deaminase, putative	1.99767
AFLA_014890	hypothetical protein	-5.20096
AFLA_014920	extracellular aspartic endopeptidase, putative	1.80702
AFLA_015180	conserved hypothetical protein	-1.35001
AFLA_015710	conserved hypothetical protein	-1.34982
AFLA_015830	MFS efflux transporter, putative	-1.96312
AFLA_015850	AflR-like C6 transcription factor, putative	-3.07126
AFLA_016500	hypothetical protein	1.27204
AFLA_017020	DUF614 domain protein	1.04237
AFLA_017410	blue light-inducible protein Bli-3	-3.68041
AFLA_017450	hypothetical protein	-1.6012
AFLA_017850	conserved hypothetical protein	-1.64324
AFLA_017860	hypothetical protein	-1.26794
AFLA_018360	4-coumarate-CoA ligase, putative	1.19018
AFLA_018460	conserved hypothetical protein	3.30275
AFLA_019230	mismatched base pair and cruciform DNA recognition protein, putative	-1.85475
AFLA_019320	hypothetical protein	-1.2975
AFLA_019350	conserved hypothetical protein	-4.0788
AFLA_019440	conserved hypothetical protein	-3.2997
AFLA_019560	hypothetical protein	3.09837
AFLA_020000	pectinesterase precursor, putative	2.46783
AFLA_020020	conserved hypothetical protein	-1.53929
AFLA_020230	hypothetical protein	1.88499
AFLA_020860	RTA1 domain protein, putative	2.95377
AFLA_020940	conserved hypothetical protein	-1.87608
AFLA_021320	NAD dependent epimerase/dehydratase, putative	-1.22324
AFLA_021450	D-amino acid oxidase, putative	1.60424
AFLA_022490	conserved hypothetical protein	1.24422
AFLA_023000	Ankyrin domain protein	-5.1195
AFLA_023010	GA4 desaturase family protein	-4.67239
AFLA_023020	NRPS-like enzyme, putative	-2.48894
AFLA_023030	cytochrome P450 oxidoreductase GliC-like, putative	-4.51593
AFLA_023040	C6 transcription factor, putative	-2.3381
AFLA_023050	MFS transporter, putative	-1.28874
AFLA_023100	hypothetical protein	1.09438
AFLA_023350	beta-glucosidase, putative	-1.75488
AFLA_023410	hypothetical protein	-1.49312
AFLA_023490	alpha-amylase, putative	2.58029
AFLA_023500	extracellular conserved serine-rich protein	2.73414
AFLA_023600	cell wall protein PhiA	3.29285
AFLA_024200	polyamine transporter, putative	-1.87135
AFLA_024210	cytochrome P450, putative	5.918
AFLA_024710	glycine-rich RNA-binding protein, putative	-3.00623
AFLA_025130	BYS1 domain protein, putative	1.06203
AFLA_025190	extracellular lipase, putative	1.7067
AFLA_027180	conserved hypothetical protein	1.41199
AFLA_027600	O-methyltransferase, putative	2.17234
AFLA_027610	hypothetical protein	1.64616
AFLA_028000	BNR/Asp-box repeat domain protein	2.11332
AFLA_028280	symbiotic chitinase, putative	1.3453
AFLA_030060	MFS monocarboxylate transporter, putative	1.00067
AFLA_030090	conserved hypothetical protein	3.80873
AFLA_031040	conserved hypothetical protein	-3.06672
AFLA_031440	conserved hypothetical protein	-1.75685
AFLA_031510	glutamate decarboxylase, putative	1.2072
AFLA_031540	hypothetical protein	-1.56743
AFLA_031920	hypothetical protein	3.24132
AFLA_032230	meiotic sister chromatid recombination protein Ish1/Msc1, putative	-1.95408
AFLA_032670	conserved hypothetical protein	1.67726
AFLA_033550	brain chitinase and chia, putative	1.88391
AFLA_033850	hypothetical protein	-1.39918
AFLA_034740	conserved hypothetical protein	-1.09902
AFLA_034980	hypothetical protein	2.0726
AFLA_035910	hypothetical protein	-3.61088
AFLA_035950	LaeA-like methyltransferase, putative	1.18094
AFLA_036020	cytochrome P450 monooxygenase, putative	-1.25545
AFLA_036300	conserved hypothetical protein	-1.20351
AFLA_037250	cyanide hydratase/nitrilase, putative	1.57287
AFLA_037770	WW domain protein	-1.57375
AFLA_038270	hypothetical protein	1.98616
AFLA_038300	sugar transporter, putative	-1.02309
AFLA_038520	hypothetical protein	2.41333
AFLA_038670	MFS transporter, putative	-1.56907
AFLA_038920	hypothetical protein	-8.39263
AFLA_039460	hypothetical protein	-2.04088
AFLA_039870	histidine acid phosphatase, putative	-1.63028
AFLA_040060	TPR domain protein	-1.90538
AFLA_040180	hypothetical protein	-1.70312
AFLA_040270	hypothetical protein	-1.61064
AFLA_040320	P38 MAPK, putative	-1.2997
AFLA_040470	MFS transporter, putative	2.52588
AFLA_040750	hypothetical protein	-1.6841
AFLA_040800	hypothetical protein	-5.73417
AFLA_040910	hypothetical protein	-1.03965
AFLA_041290	short chain dehydrogenase, putative	-2.85758
AFLA_041640	dimethylaniline monooxygenase, putative	-2.29576
AFLA_041970	chitin binding protein, putative	1.68204
AFLA_042430	hypothetical protein	-2.37651
AFLA_042900	hypothetical protein	-10.112
AFLA_043310	hypothetical protein	2.31469
AFLA_043460	hypothetical protein	1.01954
AFLA_043810	hypothetical protein	3.08571
AFLA_043860	hypothetical protein	1.26528
AFLA_043870	hypothetical protein	3.6507
AFLA_044250	hypothetical protein	3.63519
AFLA_044580	hypothetical protein	-1.08357
AFLA_044980	hypothetical protein	-2.1741
AFLA_045450	ankyrin repeat-containing protein, putative	-1.03395
AFLA_045530	hypothetical protein	-1.28406
AFLA_045600	cyclohexanone monooxygenase, putative	-5.28843
AFLA_045630	hypothetical protein	1.13032
AFLA_045670	isochorismatase family protein	1.23935
AFLA_045940	hypothetical protein	1.07438
AFLA_045960	DUF221 domain protein, putative	1.10452
AFLA_046110	hypothetical protein	4.30416
AFLA_046500	carboxylesterase, putative	2.00326
AFLA_046760	glycerol 3-phosphate dehydrogenase (GfdB), putative	-2.07568
AFLA_046870	hypothetical protein	1.01236
AFLA_048870	C2H2 transcription factor (AmdA), putative	-1.27305
AFLA_049670	short-chain dehydrogenase, putative	-1.5454
AFLA_049750	flavin-binding monooxygenase-like protein	-1.53766
AFLA_050170	dimethylaniline monooxygenase, putative	2.75074
AFLA_050870	hypothetical protein	-1.22922
AFLA_051140	beta-glucosidase, putative	2.72977
AFLA_051250	GPI anchored serine-rich protein	1.09765
AFLA_051360	hypothetical protein	-1.66117
AFLA_051460	vitamin H transporter, putative	1.08872
AFLA_051590	dihydrofolate synthase/folylpolyglutamate synthase, putative	1.4138
AFLA_052120	hypothetical protein	2.00178
AFLA_052290	hypothetical protein	2.18296
AFLA_052400	isocitrate lyase AcuD	-2.73589
AFLA_052970	hypothetical protein	-1.68211
AFLA_053100	hypothetical protein	1.27273
AFLA_053160	hypothetical protein	-3.01673
AFLA_053170	methylenetetrahydrofolate dehydrogenase, putative	-4.4941
AFLA_053190	hypothetical protein	-1.13813
AFLA_053260	hypothetical protein	1.0376
AFLA_053420	low density lipoprotein receptor, putative	-2.6035
AFLA_053490	hypothetical protein	1.15515
AFLA_053680	hypothetical protein	-2.93
AFLA_053960	fructose-bisphosphate aldolase, putative	-1.03965
AFLA_054090	polyketide synthase, putative	1.68364
AFLA_054190	hypothetical protein	-1.97846
AFLA_054320	NPP1 domain protein, putative	-1.98944
AFLA_055270	hypothetical protein	1.10149
AFLA_056410	hypothetical protein	-1.45519
AFLA_056760	hypothetical protein	-1.29243
AFLA_057000	MFS drug efflux transporter, putative	1.39722
AFLA_057020	UDP-N-acetylglucosamine enolpyruvyl transferase, putative	-2.27907
AFLA_057120	monooxygenase, putative	-1.22946
AFLA_057280	hypothetical protein	3.92708
AFLA_057450	hypothetical protein	1.16895
AFLA_057690	GDSL lipase/acylhydrolase family protein	-1.21852
AFLA_057770	pectate lyase A	1.76842
AFLA_057960	hypothetical protein	2.40333
AFLA_057980	hypothetical protein	-2.4915
AFLA_058210	2-hydroxyphytanoyl-CoA lyase, putative	-1.91713
AFLA_058830	DUF895 domain membrane protein	-2.18096
AFLA_059330	hypothetical protein	-1.8174
AFLA_059350	hypothetical protein	-2.54558
AFLA_059460	hypothetical protein	-5.6623
AFLA_059610	hypothetical protein	-2.09204
AFLA_059810	hypothetical protein	-2.32146
AFLA_059820	hypothetical protein	-2.05142
AFLA_060210	hypothetical protein	-3.64392
AFLA_060310	alpha-glucosidase, putative	1.11811
AFLA_060410	short-chain dehydrogenase, putative	1.35611
AFLA_060430	hypothetical protein	1.28076
AFLA_060830	hypothetical protein	-2.90577
AFLA_061290	dihydroflavonal-4-reductase, putative	-1.31202
AFLA_061400	aminotransferase, putative	-1.77585
AFLA_061650	hypothetical protein	-1.35069
AFLA_061720	hypothetical protein	5.10098
AFLA_061730	hypothetical protein	3.89683
AFLA_062050	putative allantoate permease of the major facilitator superfamily	1.02176
AFLA_062640	hypothetical protein	-1.52929
AFLA_062880	short chain dehydrogenase/oxidoreductase, putative	2.95281
AFLA_063040	hypothetical protein	-1.77319
AFLA_063620	pantothenate transporter, putative	-2.01242
AFLA_063680	esterase, putative	1.19731
AFLA_064210	hypothetical protein	-1.94767
AFLA_064620	hypothetical protein	-1.96997
AFLA_064900	hypothetical protein	-2.29282
AFLA_065010	isochorismatase family hydrolase, putative	-2.1703
AFLA_065410	hypothetical protein	-1.71645
AFLA_065630	TfdA family oxidoreductase, putative	-3.47797
AFLA_066090	hypothetical protein	-2.23764
AFLA_066590	hypothetical protein	-1.30394
AFLA_066720	nonribosomal peptide synthase, putative	-2.93876
AFLA_066750	periplasmic beta-glucosidase precursor, putative	-2.92976
AFLA_066790	hypothetical protein	-2.12868
AFLA_066870	hypothetical protein	-1.51286
AFLA_067000	SCP-like extracellular protein, putative	1.67677
AFLA_067850	hypothetical protein	1.48886
AFLA_067860	tyrosinase, putative	1.21046
AFLA_068010	hypothetical protein	-1.00916
AFLA_069290	hypothetical protein	3.70283
AFLA_069320	ABC multidrug transporter, putative	-2.90898
AFLA_069330	nonribosomal peptide synthase Pes1	-2.74686
AFLA_069610	hypothetical protein	-2.15786
AFLA_070040	MFS sugar transporter, putative	1.05346
AFLA_070060	hypothetical protein	-1.99566
AFLA_070090	hypothetical protein	3.2505
AFLA_070270	siderophore iron transporter, putative	-1.12259
AFLA_070400	hypothetical protein	-1.51923
AFLA_070410	hypothetical protein	-1.66357
AFLA_070470	hypothetical protein	5.83322
AFLA_070500	hypothetical protein	-1.98447
AFLA_070660	hypothetical protein	6.12723
AFLA_070910	aminotransferase, putative	-5.8152
AFLA_070940	extracellular rhamnogalacturonase, putative	-3.70342
AFLA_071550	hypothetical protein	-1.35439
AFLA_072160	conserved hypothetical protein	1.56377
AFLA_072330	disulfide oxidoreductase, putative	-1.47997
AFLA_072740	proline oxidase Put1, putative	-1.94968
AFLA_073080	arabinosidase, putative	-2.54756
AFLA_073780	conserved hypothetical protein	-1.34286
AFLA_073890	conserved hypothetical protein	2.08108
AFLA_073900	histidinol dehydrogenase, putative	2.17363
AFLA_073910	salicylate hydroxylase, putative	1.73131
AFLA_074090	hypothetical protein	-1.22306
AFLA_074600	conserved hypothetical protein	-1.16927
AFLA_074760	alkyl/aryl-sulfatase BDS1, putative	-2.66265
AFLA_074770	hypothetical protein	-2.16997
AFLA_074800	integral membrane protein	-1.09848
AFLA_075510	general amidase, putative	-3.27398
AFLA_075540	MFS monosaccharide transporter, putative	-2.10176
AFLA_075630	conserved hypothetical protein	-1.79614
AFLA_075780	conserved hypothetical protein	-2.40329
AFLA_076410	conserved hypothetical protein	1.25619
AFLA_076730	conserved hypothetical protein	2.0367
AFLA_077080	conserved hypothetical protein	-1.06605
AFLA_077840	endoglucanase, putative	1.02326
AFLA_077910	alpha-1,3-glucanase, putative	-4.63499
AFLA_078310	hypothetical protein	-1.25251
AFLA_078930	conserved hypothetical protein	4.05698
AFLA_079230	hypothetical protein	-2.84861
AFLA_079360	PKS-like enzyme, putative	1.62145
AFLA_079390	hypothetical protein	3.75676
AFLA_079550	group II pyridoxal-5-phosphate decarboxylase, putative	-2.42018
AFLA_079610	conserved hypothetical protein	-1.81222
AFLA_080940	P-type ATPase, putative	1.61089
AFLA_081160	conserved hypothetical protein	4.39233
AFLA_081390	pachytene checkpoint component Pch2, putative	1.80029
AFLA_081840	esterase, putative	-2.05361
AFLA_082210	conserved hypothetical protein	1.05781
AFLA_082790	conserved hypothetical protein	3.41625
AFLA_083320	MFS quinate transporter, putative	-1.99476
AFLA_083730	epoxide hydrolase, putative	-1.11705
AFLA_083950	MFS multidrug transporter, putative	1.66129
AFLA_084290	conserved hypothetical protein	9.54804
AFLA_084950	conserved hypothetical protein	-1.00373
AFLA_085140	extracellular thaumatin domain protein, putative	1.25981
AFLA_085570	lipase/esterase, putative	1.77094
AFLA_085660	arsenic resistance protein ArsH	-1.16517
AFLA_085680	hypothetical protein	-2.19101
AFLA_085710	arsenite efflux transporter (ArsB), putative	-1.93515
AFLA_085950	alcohol dehydrogenase, putative	3.32743
AFLA_086360	extracellular exo-polygalacturonase, putative	1.20812
AFLA_087940	conserved hypothetical protein	1.39692
AFLA_089340	allantoate permease, putative	-4.23168
AFLA_089400	extracellular phytase, putative	2.5303
AFLA_089410	hypothetical protein	4.80512
AFLA_089470	glycine-rich protein, putative	2.41856
AFLA_089490	cytochrome b5 reductase, putative	1.9147
AFLA_089930	rhamnogalacturonase A precursor, putative	2.0841
AFLA_090090	hypothetical protein	-2.0692
AFLA_090560	hypothetical protein	-1.57172
AFLA_091500	beta galactosidase, putative	2.25178
AFLA_091510	mitochondrial carrier protein ymc, putative	-2.32717
AFLA_091960	hypothetical protein	1.68167
AFLA_092050	hypothetical protein	1.13995
AFLA_092610	hypothetical protein	1.61489
AFLA_093830	AMP dependent ligase/synthetase, putative	3.70336
AFLA_094020	hypothetical protein	-2.47568
AFLA_094440	spherulin 4-like cell surface protein, putative	1.27976
AFLA_095390	siderophore iron transporter, putative	2.22946
AFLA_095410	hypothetical protein	-2.34656
AFLA_095720	hypothetical protein	-1.65501
AFLA_095770	WD domain, G-beta repeat protein	-4.05027
AFLA_095800	short-chain dehydrogenases/reductase, putative	1.06508
AFLA_095960	chitin synthase D	1.76602
AFLA_096130	hypothetical protein	11.1615
AFLA_096270	aldehyde dehydrogenase PutA	-1.27467
AFLA_096300	acyl esterase	-2.00821
AFLA_096330	C6 and C2H2 transcription factor	-1.21227
AFLA_096400	FAD-dependent monooxygenase AtmM	1.12108
AFLA_097500	Diacylglycerol acyltransferase family	-4.70428
AFLA_097510	cytochrome P450 monooxygenase, putative	-4.24552
AFLA_098070	hypothetical protein	-1.94059
AFLA_098080	hypothetical protein	-1.7446
AFLA_098280	hypothetical protein	3.21581
AFLA_098560	hypothetical protein	-2.78181
AFLA_098630	amino acid transporter, putative	-2.27374
AFLA_099550	hypothetical protein	2.07793
AFLA_099800	hypothetical protein	-1.6409
AFLA_099970	thiol methyltransferase, putative	3.3771
AFLA_100410	hypothetical protein	1.01616
AFLA_100420	amidase, putative	3.62792
AFLA_100620	polyamine transporter, putative	-1.48766
AFLA_101040	hypothetical protein	3.01468
AFLA_101330	hypothetical protein	4.07676
AFLA_101580	hypothetical protein	-1.83781
AFLA_102210	MFS transporter, putative	2.19978
AFLA_102450	nucleosome assembly protein, putative	-1.60189
AFLA_102660	hypothetical protein	1.58916
AFLA_102700	enoyl-CoA hydratase/isomerase family protein	-1.9822
AFLA_104310	DUF567 domain protein	-1.43029
AFLA_104570	hypothetical protein	1.9499
AFLA_104820	cytochrome P450 monooxygenase, putative	1.80552
AFLA_104840	tannase, putative	2.2245
AFLA_104850	siderophore iron transporter, putative	2.64983
AFLA_104890	hydrolase, putative	2.50876
AFLA_104920	cutinase, putative	4.76921
AFLA_104940	hypothetical protein	-4.53058
AFLA_105000	DUF636 domain protein	-1.16775
AFLA_105500	hypothetical protein	1.43918
AFLA_105540	MFS multidrug transporter, putative	-3.49722
AFLA_105830	cysteine/methionine metabolism pyridoxal-5-phosphate enzyme, putative	-2.52591
AFLA_105910	endoglucanase, putative	1.18209
AFLA_105920	extracellular endo-polygalacturonase, putative	1.53278
AFLA_106040	hypothetical protein	-1.12941
AFLA_106080	hypothetical protein	-1.10375
AFLA_106290	alpha-ketoglutarate-dependent taurine dioxygenase	1.27387
AFLA_106450	GPI anchored CFEM domain protein	1.09163
AFLA_106660	hypothetical protein	1.20346
AFLA_106740	cytochrome P450, putative	1.2333
AFLA_107190	hypothetical protein	-1.7
AFLA_107430	hypothetical protein	1.69793
AFLA_107680	hypothetical protein	1.02315
AFLA_107800	exo-beta-1,3-glucanase, putative	-2.21809
AFLA_107830	brain chitinase and chia, putative	-1.7227
AFLA_108030	hypothetical protein	-1.37732
AFLA_108160	extracellular polygalacturonase, putative	3.1288
AFLA_109440	long-chain-fatty-acid-CoA ligase, putative	2.20025
AFLA_109450	apoptosis inducing factor, putative	-3.40368
AFLA_110260	flavin-binding monooxygenase-like protein	-3.49322
AFLA_110270	hypothetical protein	1.19025
AFLA_110330	alkaline phosphatase, putative	-2.57952
AFLA_110420	hypothetical protein	4.33124
AFLA_110990	short chain dehydrogenase, putative	1.77856
AFLA_111280	hypothetical protein	-3.14983
AFLA_111850	hypothetical protein	-2.56283
AFLA_111970	endoglucanase, putative	1.26281
AFLA_112870	monooxygenase, putative	1.37858
AFLA_113540	hypothetical protein	2.85991
AFLA_113810	hypothetical protein	-1.69833
AFLA_114520	hypothetical protein	1.41767
AFLA_114710	hypothetical protein	-5.91761
AFLA_115020	hypothetical protein	3.56355
AFLA_115060	hypothetical protein	1.07193
AFLA_115970	maltose permease, putative	-1.93664
AFLA_116000	phytanoyl-CoA dioxygenase family protein	3.36172
AFLA_116010	hypothetical protein	3.91382
AFLA_116040	pectin lyase B	1.22833
AFLA_116330	O-methyltransferase, putative	-2.36902
AFLA_116470	hypothetical protein	1.94203
AFLA_116530	cytochrome P450 alkane hydroxylase, putative	-3.17555
AFLA_116650	pectate lyase, putative	-3.32929
AFLA_116680	white collar, putative	-1.61439
AFLA_116770	extracellular lipase, putative	1.67637
AFLA_116810	alpha-1,3-glucan synthase Ags3	2.14382
AFLA_117170	hypothetical protein	-1.62427
AFLA_117310	cytochrome P450, putative	-1.91039
AFLA_117400	bicyclomycin resistance protein, putative	-2.20812
AFLA_117670	glycosyl transferase, putative	-7.63922
AFLA_117820	C6 transcription factor, putative	1.12172
AFLA_118020	hypothetical protein	1.46825
AFLA_118270	beta-lactamase	-2.23031
AFLA_118400	hypothetical protein	-6.96545
AFLA_118450	hypothetical protein	-2.89725
AFLA_118500	period circadian protein, putative	-2.59123
AFLA_118560	hypothetical protein	1.99222
AFLA_118790	hypothetical protein	-4.21988
AFLA_119090	oxidoreductase, short chain dehydrogenase/reductase family, putative	-3.4021
AFLA_119110	NRPS-like enzyme, putative	-1.89345
AFLA_119680	hypothetical protein	2.10258
AFLA_119690	hypothetical protein	2.20976
AFLA_119860	pectin lyase, putative	1.12419
AFLA_120050	integral membrane protein	1.81064
AFLA_120430	amino acid transporter, putative	2.40235
AFLA_120460	isocitrate lyase/malate synthase, putative	-2.28342
AFLA_120790	MFS transporter, putative	-1.56745
AFLA_120900	integral membrane protein	-1.4025
AFLA_121140	hypothetical protein	1.87777
AFLA_121240	phosphate-repressible phosphate permease, putative	-2.19916
AFLA_121590	zinc-binding alcohol dehydrogenase, putative	1.17953
AFLA_121730	alpha-galactosidase C, putative	1.35974
AFLA_121970	pectate lyase, putative	4.85499
AFLA_121980	short chain dehydrogenase, putative	-3.18484
AFLA_122260	pantothenate transporter, putative	-2.05469
AFLA_122350	monoxygenase, putative	-1.07811
AFLA_122400	glucan 1,4-alpha-glucosidase, putative	-6.43211
AFLA_122510	ABC multidrug transporter, putative	1.9207
AFLA_123250	high-affinity glucose transporter, putative	-3.59546
AFLA_123320	carboxylesterase, putative	-2.81247
AFLA_123390	short-chain dehydrogenase, putative	-1.38442
AFLA_123400	sensor histidine kinase/response regulator, putative	-1.12279
AFLA_123530	hypothetical protein	-1.74189
AFLA_123660	hypothetical protein	-1.30136
AFLA_123670	UMTA methyltransferase family protein	-1.62464
AFLA_123850	hypothetical protein	-2.7279
AFLA_123960	oligopeptide transporter, putative	-1.18118
AFLA_124150	hypothetical protein	-2.40029
AFLA_124230	RTA1 domain protein, putative	6.11041
AFLA_124340	hypothetical protein	2.78267
AFLA_124500	nitric oxide synthase, putative	2.58352
AFLA_124660	pectin lyase precursor, putative	3.19417
AFLA_124870	hypothetical protein	-1.96184
AFLA_124880	hypothetical protein	-1.83744
AFLA_124970	ankyrin repeat containing protein	-4.75753
AFLA_124990	hypothetical protein	-14.772
AFLA_125000	bicyclomycin resistance protein, putative	-4.59196
AFLA_125280	hypothetical protein	-2.37023
AFLA_125690	hypothetical protein	1.39798
AFLA_125800	hypothetical protein	-3.51189
AFLA_125900	metalloproteinase, putative	4.68358
AFLA_126200	hypothetical protein	-4.2484
AFLA_126300	hypothetical protein	-1.41212
AFLA_126390	oxidoreductase 2-nitropropane dioxygenase family, putative	-3.3526
AFLA_126430	hypothetical protein	1.17976
AFLA_126530	hypothetical protein	-5.17796
AFLA_126770	hypothetical protein	-3.41086
AFLA_126780	beta-glucosidase 2 precursor, putative	1.52604
AFLA_127010	hypothetical protein	-2.11776
AFLA_127020	monooxygenase, putative	-1.25342
AFLA_127090	polyketide synthase, putative	1.49752
AFLA_127520	glucose-methanol-choline (gmc) oxidoreductase, putative	2.06807
AFLA_127780	hypothetical protein	1.27232
AFLA_128210	protein kinase, putative	1.94027
AFLA_128470	efflux pump antibiotic resistance protein, putative	4.22682
AFLA_129380	cytochrome P450, putative	1.95316
AFLA_129530	hypothetical protein	1.0759
AFLA_129800	pantothenate transporter, putative	1.5458
AFLA_131200	YT521-B-like splicing factor, putative	2.33546
AFLA_131610	cytidine deaminase, putative	2.29187
AFLA_131630	hypothetical protein	-1.52682
AFLA_131770	extracellular exo-polygalacturonase, putative	-2.49976
AFLA_131800	flavin-binding monooxygenase, putative	-1.16396
AFLA_131820	extracellular dioxygenase, putative	-1.07095
AFLA_132010	hypothetical protein	-1.54336
AFLA_132060	hypothetical protein	3.2625
AFLA_132430	polyglutamate biosynthesis protein, putative	1.92678
AFLA_133280	alcohol dehydrogenase, zinc-containing, putative	1.16444
AFLA_133810	hypothetical protein	-1.39312
AFLA_134210	hypothetical protein	5.64063
AFLA_134310	hypothetical protein	-1.01479
AFLA_134850	hypothetical protein	1.13953
AFLA_136220	3,2-trans-enoyl-CoA isomerase, putative	1.44474
AFLA_136380	hypothetical protein	3.84684
AFLA_136670	FAD/FMN-containing isoamyl alcohol oxidase MreA-like, putative	2.3609
AFLA_137120	integral membrane protein	-1.25524
AFLA_137370	hypothetical protein	3.29594
AFLA_137930	aldehyde dehydrogenase, putative	-1.07338
AFLA_137940	hypothetical protein	2.89418
AFLA_138150	hypothetical protein	3.55724
AFLA_138170	exopolygalacturonase precursor, putative	4.178
AFLA_138310	hypothetical protein	-3.66601
AFLA_138360	endo-1,4-beta-xylanase B precursor, putative	2.78641
AFLA_138370	hypothetical protein	2.23452
AFLA_138690	hypothetical protein	3.32849
AFLA_138920	monooxygenase, putative	-3.70493
AFLA_138950	alcohol dehydrogenase, putative	-1.20437
AFLA_139140	aflYa/ nadA/ NADH oxidase	-8.31168
AFLA_139150	aflY/ hypA/ hypP/ hypothetical protein	-9.11376
AFLA_139160	aflX/ ordB/ monooxygenase/ oxidase	-7.32322
AFLA_139170	aflW/ moxY/ monooxygenase	-9.21969
AFLA_139180	aflV/ cypX/ cytochrome P450 monooxygenase	-10.1501
AFLA_139200	aflQ/ ordA/ ord-1/ oxidoreductase/ cytochrome P450 monooxigenase	-9.56199
AFLA_139220	aflO/ omtB/ dmtA/ O-methyltransferase B	-8.01939
AFLA_139260	aflG/ avnA/ ord-1/ cytochrome P450 monooxygenase	-8.3106
AFLA_139320	aflJ/ estA/ esterase	-7.34831
AFLA_139340	aflS/ pathway regulator	-4.00972
AFLA_139360	aflR / apa-2 / afl-2 / transcription activator	-6.93292
AFLA_139370	aflB / fas-1 / fatty acid synthase beta subunit	-2.68663
AFLA_139390	aflD / nor-1 / reductase	-7.50028
AFLA_139400	aflCa / hypC / hypothetical protein	-8.74388
AFLA_139410	aflC / pksA / pksL1 / polyketide synthase	-4.97712
AFLA_139470	FAD dependent oxidoreductase, putative	-9.89534

## Sheet: Up in Infection hbx1 24 h 
AFLA ID	Description	24 h
AFLA_000360	hypothetical protein	-1.6641
AFLA_000530	hypothetical protein	-1.15011
AFLA_000650	amino acid transporter, putative	-4.41636
AFLA_000750	phenylacetaldoxime dehydratase family protein, putative	1.42695
AFLA_001270	hypothetical protein	-2.19006
AFLA_001690	hypothetical protein	1.03119
AFLA_001820	hypothetical protein	1.04878
AFLA_001830	hypothetical protein	3.75992
AFLA_001920	flavin-binding monooxygenase, putative	-1.14684
AFLA_001940	amino acid transporter, putative	2.08662
AFLA_002820	Protein phosphatase 2C, putative	2.07248
AFLA_002850	calcium binding protein Caleosin, putative	1.49375
AFLA_003010	alcohol dehydrogenase, putative	1.19117
AFLA_003770	ankyrin repeat-containing protein, putative	1.53634
AFLA_004690	hypothetical protein	2.24615
AFLA_005070	alcohol dehydrogenase, putative	-1.6005
AFLA_005390	hypothetical protein	-2.62559
AFLA_005560	integral membrane protein, putative	1.06048
AFLA_005880	hypothetical protein	1.6881
AFLA_005990	hypothetical protein	1.75228
AFLA_006530	hypothetical protein	1.44735
AFLA_006570	isopenicillin N-CoA epimerase, putative	-2.26146
AFLA_006760	integral membrane protein, putative	-3.00549
AFLA_006890	SIR2 family histone deacetylase, putative	1.38171
AFLA_007380	hypothetical protein	-2.78725
AFLA_007480	hypothetical protein	-5.34291
AFLA_007600	oligopeptide transporter, putative	3.34226
AFLA_007640	hypothetical protein	-5.54446
AFLA_007720	pectin lyase	1.85808
AFLA_007740	heat shock protein Hsp20/Hsp26, putative	4.55742
AFLA_008090	hypothetical protein	-1.45517
AFLA_008160	hypothetical protein	-2.205
AFLA_008190	hypothetical protein	1.08587
AFLA_008350	amine oxidase	1.72401
AFLA_008550	hypothetical protein	-1.33446
AFLA_008770	nonribosomal peptide synthase, putative	-4.21269
AFLA_008860	hypothetical protein	-1.13934
AFLA_009180	hypothetical protein	4.5162
AFLA_009190	efflux pump antibiotic resistance protein, putative	4.41617
AFLA_009400	hypothetical protein	-4.43484
AFLA_009590	UPF0075 domain protein	-1.59241
AFLA_009850	hypothetical protein	1.14402
AFLA_010140	UbiD family decarboxylase, putative	3.25114
AFLA_010160	hypothetical protein	-3.10679
AFLA_010180	hypothetical protein	2.05912
AFLA_010240	hypothetical protein	-1.20514
AFLA_010600	siderophore biosynthesis acetylase AceI, putative	4.46332
AFLA_010610	enoyl-CoA hydratase/isomerase family protein	3.19668
AFLA_010680	hypothetical protein	1.81887
AFLA_010690	vitamin H transporter, putative	2.34035
AFLA_010700	hypothetical protein	4.72445
AFLA_010710	hypothetical protein	6.85863
AFLA_010720	hypothetical protein	6.0023
AFLA_011000	hypothetical protein	2.47151
AFLA_011050	hypothetical protein	3.88051
AFLA_011060	hypothetical protein	1.79092
AFLA_011160	hypothetical protein	-2.01775
AFLA_011360	hypothetical protein	1.29189
AFLA_011420	hypothetical protein	3.73295
AFLA_011440	endoglucanase, putative	6.89912
AFLA_011480	amino acid permease (Can1), putative	1.10164
AFLA_011710	hypothetical protein	1.97974
AFLA_011970	MFS transporter, putative	1.68754
AFLA_012970	conserved hypothetical protein	-1.81385
AFLA_012980	conserved hypothetical protein	1.08619
AFLA_013100	conserved hypothetical protein	1.17762
AFLA_013190	conserved hypothetical protein	1.0904
AFLA_013270	conserved hypothetical protein	-5.74376
AFLA_013370	sugar transporter, putative	2.00274
AFLA_013470	flavin-containing amine oxidasedehydrogenase, putative	-1.44994
AFLA_013640	hypothetical protein	4.53831
AFLA_013650	allantoate permease, putative	1.68012
AFLA_013750	NPP1 domain protein, putative	-4.18948
AFLA_013760	endo-1,4-beta-glucanase, putative	-4.06614
AFLA_013780	conserved hypothetical protein	-2.01226
AFLA_013790	conserved hypothetical protein	-1.05899
AFLA_013810	hypothetical protein	1.86911
AFLA_013820	MFS myo-inositol transporter, putative	4.5443
AFLA_013830	amino acid transporter, putative	2.55636
AFLA_013860	BNR/Asp-box repeat domain protein	1.00478
AFLA_013880	lipase 2 precursor, putative	-1.61731
AFLA_013900	conserved hypothetical protein	-1.19232
AFLA_013950	hypothetical protein	-2.30128
AFLA_014190	beta-glucosidase, putative	4.04793
AFLA_014200	sugar transporter, putative	2.27392
AFLA_014410	conserved hypothetical protein	-1.04297
AFLA_014520	multicopper oxidase, putative	-5.00326
AFLA_014820	conserved hypothetical protein	-1.04192
AFLA_014860	porphobilinogen deaminase, putative	1.08591
AFLA_014890	hypothetical protein	-6.98678
AFLA_015070	conserved hypothetical protein	2.18867
AFLA_015180	conserved hypothetical protein	1.37033
AFLA_015420	sulfite reductase, putative	1.01874
AFLA_015570	conserved hypothetical protein	1.02554
AFLA_015690	conserved hypothetical protein	1.58053
AFLA_015710	conserved hypothetical protein	-3.94208
AFLA_015830	MFS efflux transporter, putative	-2.99124
AFLA_016060	conserved hypothetical protein	-1.76794
AFLA_016150	lipase, putative	-7.84255
AFLA_016170	AMP dependent CoA ligase, putative	-1.00532
AFLA_016210	arabinosidase, putative	1.06658
AFLA_016240	conserved hypothetical protein	-2.49586
AFLA_016270	hypothetical protein	-4.51965
AFLA_016390	MFS transporter, putative	-3.07838
AFLA_016530	beta-galactosidase, putative	-1.03858
AFLA_016840	Mechanosensitive ion channel family	-1.50942
AFLA_017020	DUF614 domain protein	1.50124
AFLA_017100	beta-galactosidase, putative	-1.82404
AFLA_017110	conserved hypothetical protein	-1.79504
AFLA_017450	hypothetical protein	-1.89451
AFLA_017850	conserved hypothetical protein	1.10634
AFLA_018040	glucose-methanol-choline (gmc) oxidoreductase, putative	2.05752
AFLA_018460	conserved hypothetical protein	2.41807
AFLA_019230	mismatched base pair and cruciform DNA recognition protein, putative	2.08921
AFLA_019350	conserved hypothetical protein	-1.39122
AFLA_019440	conserved hypothetical protein	-2.68044
AFLA_019560	hypothetical protein	1.10481
AFLA_019620	conserved hypothetical protein	-1.02578
AFLA_020000	pectinesterase precursor, putative	-1.22701
AFLA_020290	PH domain protein	1.30508
AFLA_020430	extracellular dioxygenase, putative	-1.07591
AFLA_020590	aldose 1-epimerase, putative	1.21269
AFLA_020660	conserved hypothetical protein	-1.07528
AFLA_020860	RTA1 domain protein, putative	3.72614
AFLA_021010	hypothetical protein	1.23496
AFLA_021410	conserved hypothetical protein	1.26341
AFLA_021440	hypothetical protein	2.62295
AFLA_021450	D-amino acid oxidase, putative	2.28644
AFLA_022240	conserved hypothetical protein	1.12722
AFLA_023000	Ankyrin domain protein	-4.77984
AFLA_023010	GA4 desaturase family protein	-3.5529
AFLA_023040	C6 transcription factor, putative	-1.88642
AFLA_023050	MFS transporter, putative	-3.01739
AFLA_023100	hypothetical protein	1.50446
AFLA_023350	beta-glucosidase, putative	-1.63089
AFLA_023410	hypothetical protein	-2.55343
AFLA_023490	alpha-amylase, putative	1.65015
AFLA_023500	extracellular conserved serine-rich protein	2.23674
AFLA_023600	cell wall protein PhiA	1.48094
AFLA_023910	conserved hypothetical protein	-1.12826
AFLA_023980	MFS transporter, putative	-1.44505
AFLA_024180	conserved hypothetical protein	1.21303
AFLA_024200	polyamine transporter, putative	1.43632
AFLA_024210	cytochrome P450, putative	1.17862
AFLA_024710	glycine-rich RNA-binding protein, putative	1.89948
AFLA_025190	extracellular lipase, putative	1.35067
AFLA_026160	C6 transcription factor (AmyR), putative	1.39903
AFLA_026310	conserved hypothetical protein	1.73616
AFLA_026600	conserved hypothetical protein	1.24085
AFLA_026970	conserved hypothetical protein	-1.06659
AFLA_027060	conserved hypothetical protein	-1.90717
AFLA_027110	C2 domain protein	1.23094
AFLA_027190	pheromone-regulated multispanning membrane protein Prm1, putative	-3.49718
AFLA_027220	hypothetical protein	1.12415
AFLA_027600	O-methyltransferase, putative	2.16329
AFLA_027690	Leucine Rich Repeat domain protein	1.3932
AFLA_027780	glutathione-S-transferase omega, putative	-1.30886
AFLA_028270	esterase family protein	2.21133
AFLA_028280	symbiotic chitinase, putative	2.89874
AFLA_028300	muramidase, putative	1.18858
AFLA_028320	vanillin dehydrogenase, putative	2.59603
AFLA_028490	conserved hypothetical protein	1.06625
AFLA_028770	conserved hypothetical protein	4.56575
AFLA_028880	hypothetical protein	1.339
AFLA_028890	tartrate dehydrogenase, putative	-1.72445
AFLA_028990	conserved hypothetical protein	3.09484
AFLA_029000	conserved hypothetical protein	3.24922
AFLA_029690	lipase/esterase, putative	1.12648
AFLA_029800	phospholipase D precursor, putative	1.61572
AFLA_030060	MFS monocarboxylate transporter, putative	1.9876
AFLA_030090	conserved hypothetical protein	2.10793
AFLA_030590	conserved hypothetical protein	2.6445
AFLA_031040	conserved hypothetical protein	-2.37452
AFLA_031510	glutamate decarboxylase, putative	1.46841
AFLA_031900	phosphoketolase, putative	2.50939
AFLA_031910	acetate kinase, putative	2.78027
AFLA_031920	hypothetical protein	1.36626
AFLA_031980	conserved hypothetical protein	1.12947
AFLA_032230	meiotic sister chromatid recombination protein Ish1/Msc1, putative	1.46458
AFLA_033050	conserved hypothetical protein	1.81534
AFLA_033550	brain chitinase and chia, putative	2.15439
AFLA_033620	RNA binding protein, putative	2.62752
AFLA_034180	uroporphyrinogen-III synthase (UroS), putative	1.75091
AFLA_034540	stress response transcription factor SrrA/Skn7, putative	-1.28158
AFLA_034680	salicylate hydroxylase, putative	3.12996
AFLA_034830	conserved hypothetical protein	1.96754
AFLA_036300	conserved hypothetical protein	1.46534
AFLA_036450	conserved hypothetical protein	-2.16957
AFLA_037010	hypothetical protein	-1.10721
AFLA_037420	DNA 3'-phosphatase Tpp1, putative	1.09709
AFLA_037770	WW domain protein	-1.98259
AFLA_037810	hypothetical protein	-1.58736
AFLA_038270	hypothetical protein	1.15322
AFLA_038310	PKS-like enzyme, putative	-1.41391
AFLA_038360	hypothetical protein	1.12449
AFLA_038520	hypothetical protein	-3.89861
AFLA_038670	MFS transporter, putative	2.62571
AFLA_038780	amino acid transporter, putative	1.30614
AFLA_038920	hypothetical protein	-1.60709
AFLA_039350	cutinase, putative	-2.90559
AFLA_039460	hypothetical protein	-1.88633
AFLA_039740	hypothetical protein	1.08321
AFLA_040060	TPR domain protein	-1.35172
AFLA_040080	hydantoin utilization protein A, putative	1.38857
AFLA_040110	GPI anchored protein, putative	1.27112
AFLA_040180	hypothetical protein	-2.24279
AFLA_040470	MFS transporter, putative	3.40365
AFLA_040760	hypothetical protein	-1.92928
AFLA_040800	hypothetical protein	-6.30294
AFLA_041050	enterobactin esterase IroE-like, putative	2.23287
AFLA_041440	dienelactone hydrolase	1.79306
AFLA_041850	phthalate transporter, putative	1.33864
AFLA_041970	chitin binding protein, putative	1.3869
AFLA_042380	DUF821 domain protein	4.12691
AFLA_042720	hypothetical protein	2.10876
AFLA_042900	hypothetical protein	-8.12831
AFLA_042920	hypothetical protein	-1.04979
AFLA_043310	hypothetical protein	1.77168
AFLA_043630	hypothetical protein	1.53555
AFLA_043770	hypothetical protein	1.03461
AFLA_043850	esterase, putative	1.47964
AFLA_043870	hypothetical protein	2.32034
AFLA_043880	transcriptional regulator, putative	1.27451
AFLA_044120	ATP-dependent protease (CrgA), putative	1.1948
AFLA_044250	hypothetical protein	2.56305
AFLA_044580	hypothetical protein	1.3331
AFLA_045080	cytochrome P450, putative	-4.18159
AFLA_045600	cyclohexanone monooxygenase, putative	-4.77493
AFLA_045880	D-amino acid oxidase, putative	-4.36472
AFLA_045940	hypothetical protein	2.80688
AFLA_046070	sugar transporter, putative	1.36754
AFLA_046110	hypothetical protein	5.55557
AFLA_046510	ATP-dependent RNA helicase Mrh4, putative	1.03041
AFLA_046760	glycerol 3-phosphate dehydrogenase (GfdB), putative	3.25471
AFLA_046870	hypothetical protein	2.14816
AFLA_048600	florfenicol exporter, putative	3.83816
AFLA_048700	hypothetical protein	1.26315
AFLA_048940	hypothetical protein	2.33378
AFLA_049070	sodium P-type ATPase, putative	3.80167
AFLA_049360	O-methyltransferase, putative	1.33808
AFLA_049670	short-chain dehydrogenase, putative	-2.64696
AFLA_050170	dimethylaniline monooxygenase, putative	-1.18053
AFLA_050850	PXA domain protein	1.22665
AFLA_050870	hypothetical protein	-2.61947
AFLA_051140	beta-glucosidase, putative	1.92887
AFLA_051260	hypothetical protein	2.99119
AFLA_051360	hypothetical protein	1.02709
AFLA_051460	vitamin H transporter, putative	1.17284
AFLA_052120	hypothetical protein	3.43425
AFLA_052250	hypothetical protein	1.85813
AFLA_052400	isocitrate lyase AcuD	-2.81771
AFLA_052710	GTPase activating protein (BUD2/CLA2), putative	-1.10116
AFLA_052880	aspartate aminotransferase, putative	1.87903
AFLA_052970	hypothetical protein	-1.75471
AFLA_053160	hypothetical protein	-3.33117
AFLA_053170	methylenetetrahydrofolate dehydrogenase, putative	-2.98198
AFLA_053260	hypothetical protein	2.31281
AFLA_053490	hypothetical protein	1.46388
AFLA_053680	hypothetical protein	1.86228
AFLA_054090	polyketide synthase, putative	3.63824
AFLA_054170	MYB3r3, putative	-1.2721
AFLA_054190	hypothetical protein	-2.60988
AFLA_054280	hypothetical protein	1.5056
AFLA_054320	NPP1 domain protein, putative	-2.07824
AFLA_054330	hypothetical protein	2.60447
AFLA_055270	hypothetical protein	1.20294
AFLA_055470	hypothetical protein	-2.80864
AFLA_056280	hypothetical protein	3.16029
AFLA_056760	hypothetical protein	2.48162
AFLA_056800	DnaJ domain protein Psi, putative	1.1703
AFLA_057070	hypothetical protein	1.1319
AFLA_057120	monooxygenase, putative	3.12033
AFLA_057400	HPP family protein	1.9774
AFLA_057650	phenylacetyl-CoA ligase, putative	1.11649
AFLA_057670	neutral protease 2 precursor, putative	-4.4088
AFLA_057690	GDSL lipase/acylhydrolase family protein	-1.92686
AFLA_057750	FAD binding domain protein	1.11168
AFLA_057770	pectate lyase A	3.18954
AFLA_057960	hypothetical protein	2.15319
AFLA_058370	hypothetical protein	-1.05364
AFLA_058380	hypothetical protein	2.12053
AFLA_058840	hypothetical protein	-8.79972
AFLA_058900	UDP-glucose-4-epimerase, putative	-1.49093
AFLA_058930	hypothetical protein	3.39999
AFLA_059610	hypothetical protein	-1.98688
AFLA_059750	hypothetical protein	2.3798
AFLA_059800	glutathione-dependent formaldehyde-activating enzyme, putative	1.33486
AFLA_059820	hypothetical protein	-1.87032
AFLA_060210	hypothetical protein	-1.00879
AFLA_060280	rhamnogalacturonan acetylesterase RgaE	1.95293
AFLA_060310	alpha-glucosidase, putative	2.77334
AFLA_060380	hypothetical protein	-1.31593
AFLA_060410	short-chain dehydrogenase, putative	1.96111
AFLA_060420	glycosyl transferase family 8 family, putative	1.17817
AFLA_060430	hypothetical protein	-1.43322
AFLA_060840	multidrug resistance-associated protein, putative	-1.43129
AFLA_061740	C2H2 finger and ankyrin domain protein, putative	1.14484
AFLA_062050	putative allantoate permease of the major facilitator superfamily	-1.2741
AFLA_062170	AI-BP family protein	1.5292
AFLA_062880	short chain dehydrogenase/oxidoreductase, putative	2.60135
AFLA_063620	pantothenate transporter, putative	1.14337
AFLA_063640	sugar transporter, putative	1.69458
AFLA_064900	hypothetical protein	-3.43662
AFLA_064920	1,3-beta-glucanosyltransferase gel4 precursor, putative	-8.69091
AFLA_064970	benzodiazepine receptor family protein	1.28928
AFLA_065390	3-isopropymalate dehydrogenase, putative	-2.54942
AFLA_065410	hypothetical protein	-4.54952
AFLA_065760	cytochrome P450, putative	-2.0778
AFLA_066090	hypothetical protein	-1.3497
AFLA_066140	feruloyl esterase A precursor, putative	1.80973
AFLA_066150	endo-1,4-beta-xylanase A precursor, putative	3.34533
AFLA_066250	hypothetical protein	1.02131
AFLA_066590	hypothetical protein	-2.80919
AFLA_066720	nonribosomal peptide synthase, putative	-6.78588
AFLA_066750	periplasmic beta-glucosidase precursor, putative	1.50001
AFLA_066790	hypothetical protein	1.99121
AFLA_067260	pantothenate transporter, putative	-1.1475
AFLA_067850	hypothetical protein	1.12655
AFLA_067860	tyrosinase, putative	2.24741
AFLA_067870	hypothetical protein	1.7312
AFLA_067880	MFS transporter, putative	1.3631
AFLA_068160	4-hydroxyphenylpyruvate dioxygenase, putative	1.19714
AFLA_068410	Sterol desaturase family	1.06648
AFLA_069040	hypothetical protein	2.72302
AFLA_069210	DNA polymerase POL4, putative	1.38472
AFLA_069290	hypothetical protein	3.67053
AFLA_069320	ABC multidrug transporter, putative	-2.06972
AFLA_069330	nonribosomal peptide synthase Pes1	-2.95361
AFLA_069340	MSF drug transporter, putative	1.69626
AFLA_069670	beta-glucosidase 1 precursor, putative	2.14925
AFLA_070030	sugar transporter, putative	3.81951
AFLA_070040	MFS sugar transporter, putative	2.70559
AFLA_070090	hypothetical protein	2.80297
AFLA_070260	hypothetical protein	-2.66706
AFLA_070270	siderophore iron transporter, putative	4.55501
AFLA_070400	hypothetical protein	-3.88014
AFLA_070410	hypothetical protein	-1.91214
AFLA_070470	hypothetical protein	1.31419
AFLA_070500	hypothetical protein	-2.17169
AFLA_070910	aminotransferase, putative	-2.53449
AFLA_070940	extracellular rhamnogalacturonase, putative	2.59638
AFLA_071330	hemagglutinin protein, putative	-2.50122
AFLA_071550	hypothetical protein	-1.32575
AFLA_072160	conserved hypothetical protein	2.51472
AFLA_072280	hypothetical protein	-1.48121
AFLA_072740	proline oxidase Put1, putative	3.10022
AFLA_072960	glutamate carboxypeptidase, putative	-6.66325
AFLA_073080	arabinosidase, putative	2.01931
AFLA_073750	conserved hypothetical protein	1.8228
AFLA_073780	conserved hypothetical protein	1.50344
AFLA_073890	conserved hypothetical protein	1.56043
AFLA_073900	histidinol dehydrogenase, putative	3.98174
AFLA_073910	salicylate hydroxylase, putative	1.66443
AFLA_074030	hypothetical protein	1.66419
AFLA_074330	CDK4/6, putative	-1.03745
AFLA_074390	hypothetical protein	1.04471
AFLA_074420	conserved hypothetical protein	-1.61637
AFLA_074760	alkyl/aryl-sulfatase BDS1, putative	-2.70244
AFLA_074770	hypothetical protein	-3.5734
AFLA_074800	integral membrane protein	-1.57218
AFLA_075190	conserved hypothetical protein	-3.97445
AFLA_075200	conserved hypothetical protein	-2.96043
AFLA_075540	MFS monosaccharide transporter, putative	2.21297
AFLA_075550	conserved hypothetical protein	1.76744
AFLA_075630	conserved hypothetical protein	2.60591
AFLA_075750	conserved hypothetical protein	-3.69743
AFLA_075760	conserved hypothetical protein	-1.82207
AFLA_075780	conserved hypothetical protein	-2.47653
AFLA_075820	methyltransferase, putative	1.29642
AFLA_075840	hyaluronan synthase, putative	1.14716
AFLA_076140	hypothetical protein	2.18772
AFLA_076350	conserved hypothetical protein	1.90598
AFLA_076410	conserved hypothetical protein	2.26732
AFLA_076690	conserved hypothetical protein	1.53726
AFLA_076730	conserved hypothetical protein	5.10079
AFLA_076860	MOSC domain protein	1.14541
AFLA_077230	hypothetical protein	2.52346
AFLA_077380	sugar transporter, putative	1.1069
AFLA_077840	endoglucanase, putative	2.63441
AFLA_077910	alpha-1,3-glucanase, putative	-7.1302
AFLA_078310	hypothetical protein	-1.40954
AFLA_078930	conserved hypothetical protein	1.62991
AFLA_079020	conserved hypothetical protein	1.06502
AFLA_079030	hypothetical protein	1.3026
AFLA_079360	PKS-like enzyme, putative	3.77746
AFLA_079390	hypothetical protein	4.68398
AFLA_079490	conserved hypothetical protein	1.28168
AFLA_079550	group II pyridoxal-5-phosphate decarboxylase, putative	-2.70409
AFLA_079840	conserved hypothetical protein	-3.28379
AFLA_080190	hypothetical protein	-1.81926
AFLA_080610	mitochondrial integral membrane protein	1.39798
AFLA_080910	conserved hypothetical protein	1.33932
AFLA_080940	P-type ATPase, putative	1.0863
AFLA_081160	conserved hypothetical protein	1.24819
AFLA_081170	conserved hypothetical protein	1.25217
AFLA_081390	pachytene checkpoint component Pch2, putative	1.54159
AFLA_082020	hypothetical protein	-1.25797
AFLA_082090	conserved hypothetical protein	3.4157
AFLA_082150	polyketide synthase, putative	-2.12368
AFLA_082210	conserved hypothetical protein	2.11263
AFLA_082450	bicyclomycin resistance protein, putative	-3.60471
AFLA_082790	conserved hypothetical protein	2.19067
AFLA_083200	glucose-inducible SAM-dependent methyltransferase Rrg1, putative	2.27416
AFLA_083730	epoxide hydrolase, putative	-1.50248
AFLA_083950	MFS multidrug transporter, putative	-2.07824
AFLA_083970	hypothetical protein	2.74339
AFLA_083980	GTP-binding protein Obg	-1.74184
AFLA_084290	conserved hypothetical protein	8.02165
AFLA_084520	conserved hypothetical protein	-1.07298
AFLA_084950	conserved hypothetical protein	1.27129
AFLA_085410	conserved hypothetical protein	1.07605
AFLA_085460	conserved hypothetical protein	-1.33754
AFLA_085570	lipase/esterase, putative	-1.25896
AFLA_085640	hypothetical protein	3.25731
AFLA_085660	arsenic resistance protein ArsH	1.3368
AFLA_085950	alcohol dehydrogenase, putative	6.01833
AFLA_086010	conserved hypothetical protein	-1.10557
AFLA_086360	extracellular exo-polygalacturonase, putative	1.23359
AFLA_086510	conserved hypothetical protein	-1.06094
AFLA_086530	ariadne RING finger, putative	-1.52255
AFLA_087170	extracellular serine-rich protein, putative	-3.70565
AFLA_087210	cell surface spherulin 4 family protein	-1.2698
AFLA_087310	conserved hypothetical protein	1.36776
AFLA_087510	conserved hypothetical protein	1.47481
AFLA_087700	hypothetical protein	1.67013
AFLA_087940	conserved hypothetical protein	1.3352
AFLA_089120	inositol monophosphatase, putative	1.40806
AFLA_089410	hypothetical protein	3.51829
AFLA_089440	hypothetical protein	-2.43639
AFLA_089470	glycine-rich protein, putative	2.60888
AFLA_089490	cytochrome b5 reductase, putative	2.72715
AFLA_089930	rhamnogalacturonase A precursor, putative	-4.49215
AFLA_089950	hypothetical protein	-3.22336
AFLA_089960	hypothetical protein	1.12085
AFLA_090560	hypothetical protein	-2.30515
AFLA_090610	hypothetical protein	-2.47305
AFLA_090720	male sterility domain containing protein, putative	2.8287
AFLA_091160	hypothetical protein	-1.25993
AFLA_091400	2-dehydropantoate 2-reductase, putative	-1.17998
AFLA_091500	beta galactosidase, putative	4.42987
AFLA_091690	isocitrate lyase	-1.09952
AFLA_091960	hypothetical protein	4.79602
AFLA_092020	hypothetical protein	-4.3254
AFLA_092050	hypothetical protein	1.91255
AFLA_092610	hypothetical protein	2.21736
AFLA_092660	casein kinase, putative	1.51826
AFLA_092930	hypothetical protein	1.2234
AFLA_093100	hypothetical protein	1.01105
AFLA_093590	arrestin (or S-antigen), N-terminal domain protein	1.97678
AFLA_093660	solid-state culture expressed protein (Aos23), putative	1.3285
AFLA_093830	AMP dependent ligase/synthetase, putative	1.12766
AFLA_093980	C6 finger domain protein, putative	-1.26535
AFLA_094020	hypothetical protein	-1.41471
AFLA_094440	spherulin 4-like cell surface protein, putative	1.80539
AFLA_095390	siderophore iron transporter, putative	-1.55511
AFLA_095410	hypothetical protein	-1.09216
AFLA_095480	hypothetical protein	2.7573
AFLA_095770	WD domain, G-beta repeat protein	-4.80915
AFLA_095960	chitin synthase D	3.62999
AFLA_095990	hypothetical protein	2.036
AFLA_096130	hypothetical protein	9.68416
AFLA_096260	aromatic ring-opening dioxygenase family protein	2.26491
AFLA_096280	hypothetical protein	2.28763
AFLA_096300	acyl esterase	1.46122
AFLA_096400	FAD-dependent monooxygenase AtmM	-2.59032
AFLA_096540	hypothetical protein	1.60215
AFLA_096690	exopolygalacturonase precursor, putative	2.13539
AFLA_097090	hypothetical protein	-1.61038
AFLA_097170	hypothetical protein	2.80248
AFLA_097180	sugar transporter, putative	1.69012
AFLA_097310	hypothetical protein	-2.60967
AFLA_097420	hypothetical protein	-1.85748
AFLA_097500	Diacylglycerol acyltransferase family	-1.34574
AFLA_097810	hypothetical protein	-1.36336
AFLA_097990	hypothetical protein	1.4346
AFLA_098070	hypothetical protein	1.81782
AFLA_098080	hypothetical protein	2.33172
AFLA_098150	aspartate aminotransferase, putative	-1.87828
AFLA_098280	hypothetical protein	1.97131
AFLA_098560	hypothetical protein	-3.6943
AFLA_098630	amino acid transporter, putative	-1.10698
AFLA_099000	Cu,Zn superoxide dismutase SOD1	1.86286
AFLA_099550	hypothetical protein	2.28893
AFLA_099800	hypothetical protein	-1.61567
AFLA_099970	thiol methyltransferase, putative	2.20938
AFLA_100420	amidase, putative	3.74744
AFLA_100620	polyamine transporter, putative	1.05957
AFLA_101040	hypothetical protein	3.14016
AFLA_101230	glutaminase GtaA	-3.2835
AFLA_101330	hypothetical protein	2.52219
AFLA_101760	molybdenum cofactor biosynthesis protein Gephyrin, putative	2.24823
AFLA_101990	MFS sugar transporter, putative	2.84734
AFLA_102190	hypothetical protein	-1.96822
AFLA_102440	hypothetical protein	2.67852
AFLA_102460	hypothetical protein	-1.07885
AFLA_102530	UMTA methyltransferase family protein	-1.87825
AFLA_102660	hypothetical protein	1.75766
AFLA_102700	enoyl-CoA hydratase/isomerase family protein	-1.23521
AFLA_103130	hypothetical protein	-1.40654
AFLA_104200	glycerol uptake protein, putative	-1.02826
AFLA_104310	DUF567 domain protein	1.60733
AFLA_104570	hypothetical protein	2.54176
AFLA_104720	hypothetical protein	1.33507
AFLA_104820	cytochrome P450 monooxygenase, putative	4.61861
AFLA_104840	tannase, putative	4.59484
AFLA_104850	siderophore iron transporter, putative	2.41514
AFLA_104870	integral membrane protein, putative	-1.38308
AFLA_104920	cutinase, putative	1.26497
AFLA_104940	hypothetical protein	-6.45185
AFLA_105040	hypothetical protein	1.8342
AFLA_105120	GNAT family acetyltransferase, putative	5.7683
AFLA_105500	hypothetical protein	1.39062
AFLA_105560	MFS transporter, putative	2.3169
AFLA_105910	endoglucanase, putative	-3.8371
AFLA_106010	MFS multidrug transporter, putative	-2.11547
AFLA_106040	hypothetical protein	-3.69615
AFLA_106080	hypothetical protein	3.07637
AFLA_106430	DNA repair helicase rad5,16, putative	-1.89055
AFLA_106450	GPI anchored CFEM domain protein	1.37454
AFLA_106620	MFS transporter, putative	-8.24049
AFLA_106660	hypothetical protein	4.11508
AFLA_107070	alpha-glucosidase, putative	1.049
AFLA_107430	hypothetical protein	-1.68666
AFLA_107580	hypothetical protein	-1.42452
AFLA_107680	hypothetical protein	2.57652
AFLA_107770	hypothetical protein	1.77143
AFLA_107800	exo-beta-1,3-glucanase, putative	-2.84403
AFLA_107860	hypothetical protein	-2.6778
AFLA_108030	hypothetical protein	-1.29484
AFLA_108160	extracellular polygalacturonase, putative	3.72656
AFLA_108270	formyltetrahydrofolate deformylase, putative	3.12255
AFLA_108480	hypothetical protein	2.06653
AFLA_108500	hypothetical protein	2.88157
AFLA_108560	O-methyltransferase, putative	-1.32355
AFLA_108700	aminotransferase GliI-like, putative	-1.99018
AFLA_108860	1,3-beta-glucanosyltransferase Gel2	1.32235
AFLA_109440	long-chain-fatty-acid-CoA ligase, putative	3.47974
AFLA_109460	TfdA family taurine dioxygenase, putative	1.37536
AFLA_109640	2-dehydro-3-deoxyglucarate aldolase, putative	-1.20641
AFLA_109780	serine/threonine-protein kinase ripk4, putative	1.87132
AFLA_110260	flavin-binding monooxygenase-like protein	-2.47587
AFLA_110330	alkaline phosphatase, putative	-2.26319
AFLA_110420	hypothetical protein	1.98636
AFLA_110430	L-ornithine aminotransferase Car2, putative	2.4632
AFLA_110990	short chain dehydrogenase, putative	3.94508
AFLA_111250	hypothetical protein	-1.59574
AFLA_111280	hypothetical protein	-2.3908
AFLA_111850	hypothetical protein	2.23266
AFLA_112050	cation chloride cotransporter, putative	1.27211
AFLA_112870	monooxygenase, putative	1.40294
AFLA_113390	hypothetical protein	2.36827
AFLA_113540	hypothetical protein	1.21951
AFLA_114560	hypothetical protein	2.2615
AFLA_114710	hypothetical protein	-1.84981
AFLA_115020	hypothetical protein	-1.26508
AFLA_115800	short-chain dehydrogenases/reductase, putative	-3.84748
AFLA_115830	hypothetical protein	-7.84961
AFLA_115970	maltose permease, putative	1.62109
AFLA_116000	phytanoyl-CoA dioxygenase family protein	1.68734
AFLA_116010	hypothetical protein	6.6054
AFLA_116020	hypothetical protein	-2.15795
AFLA_116320	hypothetical protein	-2.08253
AFLA_116490	hypothetical protein	-2.157
AFLA_116650	pectate lyase, putative	-3.42954
AFLA_116680	white collar, putative	-2.98383
AFLA_116760	alpha-esterase, putative	1.19966
AFLA_116770	extracellular lipase, putative	1.53124
AFLA_116840	salicylate 1-monooxygenase SalA	3.38006
AFLA_116900	hypothetical protein	3.26706
AFLA_117310	cytochrome P450, putative	-2.53303
AFLA_117670	glycosyl transferase, putative	-5.4115
AFLA_117800	Na+/H+ antiporter, putative	-1.48664
AFLA_117910	hypothetical protein	1.61894
AFLA_118020	hypothetical protein	1.75342
AFLA_118100	hypothetical protein	1.27948
AFLA_118400	hypothetical protein	-3.15211
AFLA_118450	hypothetical protein	-1.5776
AFLA_118480	hypothetical protein	6.27431
AFLA_118540	hypothetical protein	-2.08559
AFLA_118560	hypothetical protein	1.30498
AFLA_118660	hypothetical protein	3.44364
AFLA_119080	hypothetical protein	-1.42554
AFLA_119090	oxidoreductase, short chain dehydrogenase/reductase family, putative	-1.8524
AFLA_119110	NRPS-like enzyme, putative	-2.78529
AFLA_119520	arrestin domain containing protein, putative	1.65537
AFLA_119680	hypothetical protein	1.1125
AFLA_119690	hypothetical protein	3.9808
AFLA_119850	LsdA family protein	-1.03779
AFLA_119860	pectin lyase, putative	3.07946
AFLA_120050	integral membrane protein	2.46077
AFLA_120060	amino acid transporter (Mtr), putative	-1.51891
AFLA_120280	ATP-binding cassette transporter, putative	-1.3403
AFLA_120430	amino acid transporter, putative	4.36252
AFLA_120590	hypothetical protein	2.71696
AFLA_120730	alpha methylacyl-CoA racemase, putative	1.98337
AFLA_120740	hypothetical protein	2.15458
AFLA_120790	MFS transporter, putative	-2.71317
AFLA_121350	hypothetical protein	-1.08567
AFLA_121730	alpha-galactosidase C, putative	3.74541
AFLA_121950	hypothetical protein	4.90411
AFLA_121970	pectate lyase, putative	2.94837
AFLA_122190	cytochrome P450, putative	-1.70439
AFLA_122230	hypothetical protein	2.07278
AFLA_122260	pantothenate transporter, putative	1.78779
AFLA_122400	glucan 1,4-alpha-glucosidase, putative	-2.88259
AFLA_122510	ABC multidrug transporter, putative	1.59527
AFLA_122990	hypothetical protein	-1.20397
AFLA_123130	adenosine deaminase, putative	-1.15587
AFLA_123170	amylase, putative	5.82284
AFLA_123250	high-affinity glucose transporter, putative	-2.59974
AFLA_123320	carboxylesterase, putative	-2.09532
AFLA_123370	hypothetical protein	4.80379
AFLA_123440	aminotransferase, putative	-1.46511
AFLA_123690	extracellular arabinanase, putative	-2.29268
AFLA_123720	short-chain dehydrogenases/reductase, putative	2.16409
AFLA_123810	phytanoyl-CoA dioxygenase family protein	1.6241
AFLA_123960	oligopeptide transporter, putative	1.27371
AFLA_124140	beta lactamase domain, putative	-1.94093
AFLA_124230	RTA1 domain protein, putative	1.17635
AFLA_124260	adam, putative	-2.26621
AFLA_124340	hypothetical protein	1.66364
AFLA_124500	nitric oxide synthase, putative	-3.05017
AFLA_124660	pectin lyase precursor, putative	-2.23028
AFLA_124870	hypothetical protein	-1.12198
AFLA_124930	monooxygenase, putative	1.98358
AFLA_124940	hypothetical protein	1.50835
AFLA_124970	ankyrin repeat containing protein	-2.81467
AFLA_125000	bicyclomycin resistance protein, putative	-2.78096
AFLA_125280	hypothetical protein	-7.09684
AFLA_125540	hypothetical protein	2.18386
AFLA_125800	hypothetical protein	-1.99655
AFLA_125900	metalloproteinase, putative	2.2342
AFLA_125970	epoxide hydrolase, putative	-1.05866
AFLA_126200	hypothetical protein	-2.89223
AFLA_126230	hypothetical protein	-4.78002
AFLA_126300	hypothetical protein	-1.36394
AFLA_126310	hypothetical protein	-1.99048
AFLA_126340	MFS sugar transporter Stl1, putative	1.08877
AFLA_126390	oxidoreductase 2-nitropropane dioxygenase family, putative	-2.09763
AFLA_126430	hypothetical protein	2.92339
AFLA_126520	hypothetical protein	-1.15961
AFLA_126530	hypothetical protein	-6.87976
AFLA_126640	integral membrane protein Pth11-like, putative	3.10737
AFLA_126770	hypothetical protein	3.98833
AFLA_126780	beta-glucosidase 2 precursor, putative	6.76268
AFLA_127090	polyketide synthase, putative	1.61145
AFLA_127480	MFS multidrug transporter, putative	2.15267
AFLA_127550	hypothetical protein	-6.95899
AFLA_127780	hypothetical protein	1.73062
AFLA_128110	aquaglyceroporin, putative	1.62283
AFLA_128210	protein kinase, putative	1.13024
AFLA_128470	efflux pump antibiotic resistance protein, putative	1.48274
AFLA_128870	feruloyl esterase, putative	1.37171
AFLA_129140	rootletin, putative	-1.69898
AFLA_129380	cytochrome P450, putative	4.1093
AFLA_129510	aconitase, putative	1.79162
AFLA_131200	YT521-B-like splicing factor, putative	1.36132
AFLA_131610	cytidine deaminase, putative	2.80629
AFLA_131630	hypothetical protein	-3.82772
AFLA_132060	hypothetical protein	2.31435
AFLA_132240	FMN-dependent dehydrogenase family protein	-2.45882
AFLA_132420	PTH11-like integral membrane protein	1.36467
AFLA_132430	polyglutamate biosynthesis protein, putative	3.11095
AFLA_133280	alcohol dehydrogenase, zinc-containing, putative	2.22869
AFLA_133810	hypothetical protein	-2.59549
AFLA_134830	phospholipase A2 (PlaA), putative	1.38877
AFLA_134840	phosphoinositide phosphatase Pten/Tep1, putative	1.12708
AFLA_135500	hypothetical protein	2.15458
AFLA_135700	allergenic cerato-platanin Asp F13	-1.72363
AFLA_135720	hypothetical protein	-1.18195
AFLA_136270	hypothetical protein	1.19388
AFLA_136380	hypothetical protein	2.49613
AFLA_136670	FAD/FMN-containing isoamyl alcohol oxidase MreA-like, putative	1.16876
AFLA_136900	hypothetical protein	-2.89712
AFLA_137090	hypothetical protein	-3.86138
AFLA_137100	hypothetical protein	-2.9468
AFLA_137120	integral membrane protein	-1.59848
AFLA_137370	hypothetical protein	1.54439
AFLA_137570	hypothetical protein	-3.5654
AFLA_137660	hypothetical protein	2.37486
AFLA_137970	hypothetical protein	1.22608
AFLA_138150	hypothetical protein	-2.18917
AFLA_138170	exopolygalacturonase precursor, putative	1.76723
AFLA_138180	lysozyme, putative	1.84042
AFLA_138310	hypothetical protein	-6.97899
AFLA_138360	endo-1,4-beta-xylanase B precursor, putative	1.72942
AFLA_138380	endoglucanase, putative	2.37937
AFLA_138680	pentachlorophenol 4-monooxygenase, putative	-2.25973
AFLA_138690	hypothetical protein	-2.52701
AFLA_138720	AMP dependent ligase/synthetase, putative	1.40675
AFLA_138920	monooxygenase, putative	-4.83054
AFLA_139140	aflYa/ nadA/ NADH oxidase	-11.3737
AFLA_139150	aflY/ hypA/ hypP/ hypothetical protein	-10.5561
AFLA_139160	aflX/ ordB/ monooxygenase/ oxidase	-10.3409
AFLA_139170	aflW/ moxY/ monooxygenase	-11.3708
AFLA_139180	aflV/ cypX/ cytochrome P450 monooxygenase	-11.1298
AFLA_139200	aflQ/ ordA/ ord-1/ oxidoreductase/ cytochrome P450 monooxigenase	-10.6636
AFLA_139220	aflO/ omtB/ dmtA/ O-methyltransferase B	-10.9727
AFLA_139260	aflG/ avnA/ ord-1/ cytochrome P450 monooxygenase	-12.0144
AFLA_139320	aflJ/ estA/ esterase	-10.5804
AFLA_139340	aflS/ pathway regulator	-5.01962
AFLA_139360	aflR / apa-2 / afl-2 / transcription activator	-5.75199
AFLA_139370	aflB / fas-1 / fatty acid synthase beta subunit	-4.87177
AFLA_139390	aflD / nor-1 / reductase	-10.1243
AFLA_139400	aflCa / hypC / hypothetical protein	-12.3142
AFLA_139410	aflC / pksA / pksL1 / polyketide synthase	-5.61767
AFLA_139470	FAD dependent oxidoreductase, putative	-8.44066

## Sheet: Up in Infection hbx1 48 h 
AFLA ID	Description	48 h
AFLA_000360	hypothetical protein	1.7974
AFLA_000540	amidase, putative	3.25197
AFLA_000590	hypothetical protein	3.08801
AFLA_000650	amino acid transporter, putative	2.1131
AFLA_000740	hypothetical protein	1.85916
AFLA_000790	hypothetical protein	2.20038
AFLA_001010	benzoate 4-monooxygenase cytochrome P450, putative	1.15155
AFLA_001090	hypothetical protein	2.27505
AFLA_001270	hypothetical protein	-1.1826
AFLA_001380	hypothetical protein	1.69324
AFLA_001820	hypothetical protein	-1.36513
AFLA_001830	hypothetical protein	4.85966
AFLA_001890	cellobiose dehydrogenase	-1.06335
AFLA_001920	flavin-binding monooxygenase, putative	-3.37966
AFLA_002030	MFS monocarboxylate transporter, putative	-1.76313
AFLA_002440	hypothetical protein	1.09653
AFLA_002850	calcium binding protein Caleosin, putative	-2.32958
AFLA_003010	alcohol dehydrogenase, putative	2.96525
AFLA_003020	hypothetical protein	-1.2212
AFLA_003350	hypothetical protein	1.98494
AFLA_003400	hypothetical protein	1.34141
AFLA_003970	hypothetical protein	-2.38662
AFLA_004030	hypothetical protein	1.30889
AFLA_004380	xylosidase : arabinofuranosidase, putative	2.46893
AFLA_004510	peroxidase, putative	-3.27222
AFLA_004660	glycogen synthase Gsy1, putative	-1.06898
AFLA_004690	hypothetical protein	-2.61059
AFLA_004880	amine oxidase, flavin-containing superfamily	-5.80256
AFLA_005020	hypothetical protein	-1.98129
AFLA_005070	alcohol dehydrogenase, putative	-1.1316
AFLA_005390	hypothetical protein	-1.75533
AFLA_005600	SNARE domain protein	-1.22733
AFLA_005880	hypothetical protein	-1.20465
AFLA_005990	hypothetical protein	2.34197
AFLA_006080	hypothetical protein	4.3421
AFLA_006700	hypothetical protein	1.05194
AFLA_006880	PQ loop repeat protein	1.26985
AFLA_006890	SIR2 family histone deacetylase, putative	1.39372
AFLA_007570	hypothetical protein	2.38032
AFLA_007600	oligopeptide transporter, putative	-1.57667
AFLA_007640	hypothetical protein	-3.5406
AFLA_007720	pectin lyase	-3.73303
AFLA_007740	heat shock protein Hsp20/Hsp26, putative	4.20925
AFLA_008090	hypothetical protein	-3.11952
AFLA_008160	hypothetical protein	1.07884
AFLA_008350	amine oxidase	3.36543
AFLA_008480	CFEM domain protein	-1.37019
AFLA_008760	multidrug resistance protein, putative	1.19635
AFLA_009180	hypothetical protein	5.52108
AFLA_009190	efflux pump antibiotic resistance protein, putative	3.80018
AFLA_009300	AMP dependent ligase, putative	3.27862
AFLA_009400	hypothetical protein	1.56706
AFLA_009590	UPF0075 domain protein	5.12789
AFLA_009610	hypothetical protein	2.18839
AFLA_009850	hypothetical protein	2.49045
AFLA_010000	polyketide synthase, putative	1.97652
AFLA_010140	UbiD family decarboxylase, putative	1.7787
AFLA_010400	hypothetical protein	2.72748
AFLA_010610	enoyl-CoA hydratase/isomerase family protein	1.583
AFLA_010680	hypothetical protein	3.95298
AFLA_010690	vitamin H transporter, putative	2.28506
AFLA_010700	hypothetical protein	3.42703
AFLA_010710	hypothetical protein	1.95927
AFLA_010720	hypothetical protein	3.12119
AFLA_010820	hypothetical protein	1.19973
AFLA_010830	hypothetical protein	2.06604
AFLA_010840	hypothetical protein	3.27909
AFLA_010980	maltase MalT	-1.9248
AFLA_011000	hypothetical protein	4.47025
AFLA_011050	hypothetical protein	6.04936
AFLA_011060	hypothetical protein	3.84826
AFLA_011160	hypothetical protein	-2.92908
AFLA_011360	hypothetical protein	-1.4556
AFLA_011420	hypothetical protein	1.48368
AFLA_011440	endoglucanase, putative	4.89509
AFLA_011480	amino acid permease (Can1), putative	1.87824
AFLA_011710	hypothetical protein	1.69589
AFLA_011840	hypothetical protein	6.45061
AFLA_011970	MFS transporter, putative	1.29337
AFLA_012010	C6 transcription factor (Ctf1B), putative	1.55645
AFLA_012560	hypothetical protein	1.29041
AFLA_012920	conserved hypothetical protein	3.17932
AFLA_012970	conserved hypothetical protein	1.14264
AFLA_012980	conserved hypothetical protein	1.48776
AFLA_013090	fungal specific transcription factor, putative	1.04755
AFLA_013100	conserved hypothetical protein	2.77956
AFLA_013190	conserved hypothetical protein	2.03481
AFLA_013270	conserved hypothetical protein	-4.75418
AFLA_013290	conserved hypothetical protein	-1.6393
AFLA_013370	sugar transporter, putative	3.12539
AFLA_013400	ankyrin repeat-containing protein, putative	2.57647
AFLA_013460	hypothetical protein	-2.06969
AFLA_013470	flavin-containing amine oxidasedehydrogenase, putative	-2.94499
AFLA_013640	hypothetical protein	-5.52666
AFLA_013750	NPP1 domain protein, putative	-3.48646
AFLA_013760	endo-1,4-beta-glucanase, putative	-1.04056
AFLA_013780	conserved hypothetical protein	-2.36393
AFLA_013790	conserved hypothetical protein	1.01473
AFLA_013810	hypothetical protein	6.96138
AFLA_013820	MFS myo-inositol transporter, putative	5.82773
AFLA_013830	amino acid transporter, putative	1.1327
AFLA_013860	BNR/Asp-box repeat domain protein	1.92898
AFLA_013880	lipase 2 precursor, putative	1.50219
AFLA_013890	C2H2 transcription factor, putative	1.07236
AFLA_013950	hypothetical protein	-1.94471
AFLA_014190	beta-glucosidase, putative	3.2081
AFLA_014200	sugar transporter, putative	2.25415
AFLA_014520	multicopper oxidase, putative	-6.87662
AFLA_014730	urease accessory protein UreD	-1.53394
AFLA_014770	hypothetical protein	3.23643
AFLA_014890	hypothetical protein	-3.23582
AFLA_015070	conserved hypothetical protein	2.39626
AFLA_015420	sulfite reductase, putative	-1.54266
AFLA_015570	conserved hypothetical protein	2.08339
AFLA_015590	conserved hypothetical protein	1.51718
AFLA_015710	conserved hypothetical protein	-2.43064
AFLA_015830	MFS efflux transporter, putative	-1.57279
AFLA_016150	lipase, putative	-5.56632
AFLA_016210	arabinosidase, putative	1.5135
AFLA_016240	conserved hypothetical protein	2.01018
AFLA_016270	hypothetical protein	-3.79502
AFLA_016370	dimethylaniline monooxygenase, putative	-2.86394
AFLA_016500	hypothetical protein	1.49589
AFLA_017410	blue light-inducible protein Bli-3	-2.5078
AFLA_017450	hypothetical protein	-2.04321
AFLA_017850	conserved hypothetical protein	-1.15535
AFLA_017860	hypothetical protein	-1.45088
AFLA_017940	hypothetical protein	-1.16784
AFLA_018040	glucose-methanol-choline (gmc) oxidoreductase, putative	4.12556
AFLA_018460	conserved hypothetical protein	2.62276
AFLA_019230	mismatched base pair and cruciform DNA recognition protein, putative	-1.2715
AFLA_019290	hypothetical protein	4.20864
AFLA_019350	conserved hypothetical protein	-2.49024
AFLA_019440	conserved hypothetical protein	-1.7198
AFLA_019560	hypothetical protein	1.53077
AFLA_019620	conserved hypothetical protein	-1.92283
AFLA_019740	multidrug resistance protein 1, 2, putative	-1.47765
AFLA_019970	conserved hypothetical protein	1.52586
AFLA_020430	extracellular dioxygenase, putative	-1.71202
AFLA_020510	40S ribosomal protein S0	1.45932
AFLA_020590	aldose 1-epimerase, putative	2.74268
AFLA_020650	YjgH family protein	1.31369
AFLA_020860	RTA1 domain protein, putative	4.57638
AFLA_020940	conserved hypothetical protein	1.1609
AFLA_021010	hypothetical protein	2.95867
AFLA_021050	hypothetical protein	-9.36438
AFLA_021240	HLH transcription factor (GlcD gamma), putative	-2.10497
AFLA_021320	NAD dependent epimerase/dehydratase, putative	1.64626
AFLA_023000	Ankyrin domain protein	-1.51952
AFLA_023010	GA4 desaturase family protein	-1.47481
AFLA_023020	NRPS-like enzyme, putative	-3.4885
AFLA_023030	cytochrome P450 oxidoreductase GliC-like, putative	-4.03373
AFLA_023100	hypothetical protein	2.89587
AFLA_023250	conserved hypothetical protein	-1.17362
AFLA_023260	pathway-specific regulatory protein	1.2341
AFLA_023300	conserved hypothetical protein	-3.13723
AFLA_023350	beta-glucosidase, putative	1.4296
AFLA_023370	conserved hypothetical protein	4.12127
AFLA_023490	alpha-amylase, putative	2.60903
AFLA_023500	extracellular conserved serine-rich protein	3.96375
AFLA_023600	cell wall protein PhiA	-1.4538
AFLA_023980	MFS transporter, putative	-1.00155
AFLA_024180	conserved hypothetical protein	2.70854
AFLA_024200	polyamine transporter, putative	2.20428
AFLA_024210	cytochrome P450, putative	3.93514
AFLA_024420	hypothetical protein	-4.62255
AFLA_024530	ABC multidrug transporter, putative	3.06512
AFLA_024710	glycine-rich RNA-binding protein, putative	-1.84236
AFLA_024840	MYB DNA-binding domain protein	1.40195
AFLA_025060	GPI anchored protein, putative	-2.65374
AFLA_025130	BYS1 domain protein, putative	4.24363
AFLA_025190	extracellular lipase, putative	1.84494
AFLA_025790	hypothetical protein	-1.7716
AFLA_025950	conserved hypothetical protein	2.73
AFLA_026160	C6 transcription factor (AmyR), putative	1.19692
AFLA_026200	NAD binding Rossmann fold oxidoreductase, putative	-1.41055
AFLA_027060	conserved hypothetical protein	-1.24053
AFLA_027180	conserved hypothetical protein	2.52349
AFLA_027190	pheromone-regulated multispanning membrane protein Prm1, putative	-1.41435
AFLA_027550	hypothetical protein	1.325
AFLA_027600	O-methyltransferase, putative	2.82645
AFLA_027610	hypothetical protein	4.40689
AFLA_027690	Leucine Rich Repeat domain protein	2.14075
AFLA_028270	esterase family protein	2.30959
AFLA_028280	symbiotic chitinase, putative	1.55594
AFLA_028300	muramidase, putative	3.129
AFLA_028330	hypothetical protein	-2.83459
AFLA_028410	C6 finger domain protein, putative	1.49544
AFLA_028540	hypothetical protein	-2.76907
AFLA_028770	conserved hypothetical protein	2.10107
AFLA_028880	hypothetical protein	-2.78625
AFLA_029800	phospholipase D precursor, putative	-1.40405
AFLA_029930	hypothetical protein	1.05763
AFLA_030060	MFS monocarboxylate transporter, putative	1.23118
AFLA_030090	conserved hypothetical protein	2.66457
AFLA_030590	conserved hypothetical protein	2.77412
AFLA_030690	conserved hypothetical protein	1.05311
AFLA_031040	conserved hypothetical protein	-7.54635
AFLA_031140	LipA and NB-ARC domain protein	-2.11875
AFLA_031230	RNA polymerase II ctd phosphatase, putative	1.08314
AFLA_031440	conserved hypothetical protein	-1.77308
AFLA_031900	phosphoketolase, putative	1.08742
AFLA_031910	acetate kinase, putative	1.63607
AFLA_031920	hypothetical protein	2.07788
AFLA_032910	hypothetical protein	-3.51361
AFLA_033050	conserved hypothetical protein	5.55779
AFLA_033490	nitrilase	1.84242
AFLA_033850	hypothetical protein	-2.6963
AFLA_034630	conserved hypothetical protein	-2.59813
AFLA_034650	allantoate permease, putative	-2.11148
AFLA_034830	conserved hypothetical protein	-1.01608
AFLA_034980	hypothetical protein	3.85786
AFLA_035200	hypothetical protein	1.99056
AFLA_035950	LaeA-like methyltransferase, putative	2.09509
AFLA_036020	cytochrome P450 monooxygenase, putative	-1.25791
AFLA_036300	conserved hypothetical protein	-1.58695
AFLA_036820	conserved hypothetical protein	2.43996
AFLA_037250	cyanide hydratase/nitrilase, putative	-3.47044
AFLA_037620	FK506 suppressor Sfk1, putative	-1.33405
AFLA_038270	hypothetical protein	-3.4749
AFLA_038320	multidrug resistance protein, putative	1.25107
AFLA_038360	hypothetical protein	-1.74487
AFLA_038400	aquaglyceroporin, putative	1.67568
AFLA_038670	MFS transporter, putative	2.76486
AFLA_038730	mannan endo-1,4-beta-mannosidase A precursor, putative	-4.50985
AFLA_038780	amino acid transporter, putative	-1.94192
AFLA_038920	hypothetical protein	2.7244
AFLA_039740	hypothetical protein	-3.10051
AFLA_039870	histidine acid phosphatase, putative	-3.05823
AFLA_040060	TPR domain protein	-1.02848
AFLA_040100	hypothetical protein	-5.03725
AFLA_040130	hypothetical protein	1.10442
AFLA_040170	hypothetical protein	1.89683
AFLA_040180	hypothetical protein	1.61177
AFLA_040270	hypothetical protein	-1.14335
AFLA_040470	MFS transporter, putative	1.16693
AFLA_040750	hypothetical protein	-4.53377
AFLA_040800	hypothetical protein	-6.90799
AFLA_040910	hypothetical protein	-2.61938
AFLA_041290	short chain dehydrogenase, putative	1.54908
AFLA_041640	dimethylaniline monooxygenase, putative	3.52907
AFLA_041850	phthalate transporter, putative	1.09765
AFLA_042380	DUF821 domain protein	4.287
AFLA_042430	hypothetical protein	2.28703
AFLA_042720	hypothetical protein	2.96642
AFLA_042810	hypothetical protein	3.96107
AFLA_042900	hypothetical protein	-6.00726
AFLA_043080	methylated-DNA-protein-cysteine methyltransferase	1.30043
AFLA_043310	hypothetical protein	2.16771
AFLA_043440	hypothetical protein	1.24703
AFLA_043460	hypothetical protein	2.74241
AFLA_043630	hypothetical protein	-1.51362
AFLA_043770	hypothetical protein	2.52324
AFLA_043850	esterase, putative	1.04768
AFLA_043870	hypothetical protein	2.40314
AFLA_043880	transcriptional regulator, putative	1.60802
AFLA_043910	DNA repair protein rad9, putative	1.14277
AFLA_044130	hypothetical protein	-1.63419
AFLA_044250	hypothetical protein	1.61804
AFLA_044580	hypothetical protein	-1.00554
AFLA_044660	hypothetical protein	3.16343
AFLA_044980	hypothetical protein	-1.34478
AFLA_045120	hypothetical protein	4.53989
AFLA_045180	NAD dependent epimerase/dehydratase, putative	-7.71639
AFLA_045450	ankyrin repeat-containing protein, putative	3.12004
AFLA_045460	hypothetical protein	2.00515
AFLA_045530	hypothetical protein	-6.08874
AFLA_045600	cyclohexanone monooxygenase, putative	-3.31055
AFLA_045640	hydrolase, putative	2.62545
AFLA_045880	D-amino acid oxidase, putative	-2.92304
AFLA_045940	hypothetical protein	3.43038
AFLA_046110	hypothetical protein	5.61414
AFLA_046500	carboxylesterase, putative	1.3967
AFLA_046760	glycerol 3-phosphate dehydrogenase (GfdB), putative	-2.09291
AFLA_046870	hypothetical protein	2.39075
AFLA_047150	nuclear migration protein, putative	1.20612
AFLA_048600	florfenicol exporter, putative	3.62821
AFLA_048700	hypothetical protein	-3.04703
AFLA_049260	sugar transporter, putative	-2.22506
AFLA_050170	dimethylaniline monooxygenase, putative	-1.54179
AFLA_050450	toxin biosynthesis protein, putative	1.35092
AFLA_050850	PXA domain protein	1.10306
AFLA_051260	hypothetical protein	4.05754
AFLA_051450	hypothetical protein	1.16882
AFLA_052120	hypothetical protein	3.80089
AFLA_052180	hypothetical protein	-2.19975
AFLA_052880	aspartate aminotransferase, putative	4.71499
AFLA_053100	hypothetical protein	-1.16549
AFLA_053160	hypothetical protein	-7.95938
AFLA_053170	methylenetetrahydrofolate dehydrogenase, putative	-8.02673
AFLA_053180	monocarboxylate permease, putative	-1.39052
AFLA_053190	hypothetical protein	-3.27428
AFLA_053260	hypothetical protein	-1.72177
AFLA_053490	hypothetical protein	3.49535
AFLA_053550	hypothetical protein	3.12366
AFLA_053570	hypothetical protein	1.67158
AFLA_053680	hypothetical protein	-2.97068
AFLA_053960	fructose-bisphosphate aldolase, putative	2.7822
AFLA_054090	polyketide synthase, putative	-1.06682
AFLA_054170	MYB3r3, putative	3.38559
AFLA_054190	hypothetical protein	5.08227
AFLA_054250	hypothetical protein	1.06272
AFLA_054280	hypothetical protein	1.75964
AFLA_054320	NPP1 domain protein, putative	-1.94909
AFLA_054330	hypothetical protein	1.23749
AFLA_054360	hypothetical protein	2.0937
AFLA_055270	hypothetical protein	1.04882
AFLA_055470	hypothetical protein	-5.37939
AFLA_056280	hypothetical protein	-2.47127
AFLA_056410	hypothetical protein	1.69023
AFLA_056760	hypothetical protein	1.71441
AFLA_056780	C6 transcription factor, putative	1.31835
AFLA_056860	NADPH-dependent FMN/FAD containing oxidoreductase, putative	1.25297
AFLA_057000	MFS drug efflux transporter, putative	4.74378
AFLA_057020	UDP-N-acetylglucosamine enolpyruvyl transferase, putative	2.09712
AFLA_057070	hypothetical protein	2.59466
AFLA_057400	HPP family protein	-2.38808
AFLA_057670	neutral protease 2 precursor, putative	-4.61737
AFLA_057810	hypothetical protein	2.85933
AFLA_057960	hypothetical protein	2.39261
AFLA_057980	hypothetical protein	-1.23053
AFLA_058060	alpha-acetolactate decarboxylase, putative	2.16307
AFLA_058120	hypothetical protein	4.79781
AFLA_058210	2-hydroxyphytanoyl-CoA lyase, putative	3.51563
AFLA_058380	hypothetical protein	1.16814
AFLA_058510	hypothetical protein	3.30388
AFLA_058830	DUF895 domain membrane protein	-1.92945
AFLA_058840	hypothetical protein	-9.44749
AFLA_058930	hypothetical protein	5.47711
AFLA_059010	pantothenate transporter, putative	-5.60124
AFLA_059160	hypothetical protein	2.04618
AFLA_059280	hypothetical protein	-7.19175
AFLA_059330	hypothetical protein	2.2583
AFLA_059350	hypothetical protein	-2.79902
AFLA_059380	integral membrane protein	1.18126
AFLA_059460	hypothetical protein	-4.85548
AFLA_059500	extracellular endo-1,5-alpha-L-arabinase, putative	-2.96631
AFLA_059560	hypothetical protein	-4.83371
AFLA_059610	hypothetical protein	-2.44828
AFLA_059710	homeobox-containing protein wariai, putative	1.56966
AFLA_059800	glutathione-dependent formaldehyde-activating enzyme, putative	-5.52012
AFLA_059810	hypothetical protein	1.62828
AFLA_059820	hypothetical protein	-2.00316
AFLA_060010	PKS-like enzyme, putative	-2.93622
AFLA_060210	hypothetical protein	-2.57649
AFLA_060280	rhamnogalacturonan acetylesterase RgaE	1.23594
AFLA_060310	alpha-glucosidase, putative	2.85395
AFLA_060410	short-chain dehydrogenase, putative	2.80853
AFLA_060420	glycosyl transferase family 8 family, putative	-1.34794
AFLA_060430	hypothetical protein	-2.02777
AFLA_060830	hypothetical protein	1.96468
AFLA_060840	multidrug resistance-associated protein, putative	2.05222
AFLA_061290	dihydroflavonal-4-reductase, putative	-1.32905
AFLA_061400	aminotransferase, putative	1.96229
AFLA_061650	hypothetical protein	-1.42665
AFLA_061730	hypothetical protein	-2.09861
AFLA_061870	hypothetical protein	-1.50604
AFLA_062640	hypothetical protein	-10.9749
AFLA_062880	short chain dehydrogenase/oxidoreductase, putative	-3.89774
AFLA_062900	glycerol-3-phosphate O-acyltransferase, putative	1.27215
AFLA_063040	hypothetical protein	3.96327
AFLA_063550	hypothetical protein	5.37479
AFLA_063620	pantothenate transporter, putative	3.23639
AFLA_063640	sugar transporter, putative	7.93345
AFLA_063680	esterase, putative	1.97999
AFLA_064210	hypothetical protein	-1.94552
AFLA_064900	hypothetical protein	-2.81113
AFLA_064920	1,3-beta-glucanosyltransferase gel4 precursor, putative	-6.49558
AFLA_065390	3-isopropymalate dehydrogenase, putative	-1.79095
AFLA_065630	TfdA family oxidoreductase, putative	-2.49652
AFLA_066090	hypothetical protein	-1.52735
AFLA_066140	feruloyl esterase A precursor, putative	2.2588
AFLA_066150	endo-1,4-beta-xylanase A precursor, putative	2.77052
AFLA_066300	endoglucanase, putative	-2.59537
AFLA_066590	hypothetical protein	-2.67552
AFLA_066720	nonribosomal peptide synthase, putative	-2.36083
AFLA_066750	periplasmic beta-glucosidase precursor, putative	2.10822
AFLA_066760	hypothetical protein	3.79635
AFLA_066790	hypothetical protein	2.69429
AFLA_066830	hypothetical protein	1.1556
AFLA_067260	pantothenate transporter, putative	1.85657
AFLA_067860	tyrosinase, putative	2.69143
AFLA_067870	hypothetical protein	-4.18682
AFLA_067880	MFS transporter, putative	3.09189
AFLA_067900	hypothetical protein	-1.84507
AFLA_068010	hypothetical protein	-1.14353
AFLA_069290	hypothetical protein	3.75532
AFLA_069320	ABC multidrug transporter, putative	-1.81988
AFLA_069670	beta-glucosidase 1 precursor, putative	3.52613
AFLA_070020	alpha-L-arabinofuranosidase	1.3118
AFLA_070030	sugar transporter, putative	4.9393
AFLA_070040	MFS sugar transporter, putative	3.73648
AFLA_070090	hypothetical protein	2.68381
AFLA_070160	monooxygenase, putative	1.79497
AFLA_070260	hypothetical protein	-1.31457
AFLA_070290	AMP dependent ligase/synthetase, putative	1.68385
AFLA_070560	hypothetical protein	1.06041
AFLA_070660	hypothetical protein	3.83232
AFLA_070910	aminotransferase, putative	-5.33535
AFLA_071330	hemagglutinin protein, putative	-2.82733
AFLA_072160	conserved hypothetical protein	2.67634
AFLA_072280	hypothetical protein	3.57593
AFLA_072450	conserved hypothetical protein	-1.69074
AFLA_072570	conserved hypothetical protein	1.7308
AFLA_072740	proline oxidase Put1, putative	-5.33724
AFLA_072960	glutamate carboxypeptidase, putative	-6.16656
AFLA_073080	arabinosidase, putative	2.94367
AFLA_073750	conserved hypothetical protein	-1.64168
AFLA_073870	C6 transcription factor RegA, putative	1.64367
AFLA_073890	conserved hypothetical protein	3.20335
AFLA_073910	salicylate hydroxylase, putative	5.00675
AFLA_074030	hypothetical protein	3.65308
AFLA_074390	hypothetical protein	4.54909
AFLA_074600	conserved hypothetical protein	4.53201
AFLA_074760	alkyl/aryl-sulfatase BDS1, putative	-6.54985
AFLA_074770	hypothetical protein	-5.53994
AFLA_074800	integral membrane protein	-2.96196
AFLA_075190	conserved hypothetical protein	-6.29335
AFLA_075200	conserved hypothetical protein	-4.9644
AFLA_075410	monocarboxylate permease homolog, mch4, putative	1.4483
AFLA_075420	homeobox protein meis, putative	2.77082
AFLA_075530	hypothetical protein	1.23214
AFLA_075630	conserved hypothetical protein	-3.3951
AFLA_075750	conserved hypothetical protein	-3.48157
AFLA_075780	conserved hypothetical protein	1.27016
AFLA_075820	methyltransferase, putative	3.65044
AFLA_076140	hypothetical protein	3.34648
AFLA_076410	conserved hypothetical protein	1.27511
AFLA_076730	conserved hypothetical protein	2.05606
AFLA_076740	conserved hypothetical protein	-1.21418
AFLA_076820	glucose oxidase, putative	2.84781
AFLA_076860	MOSC domain protein	2.16496
AFLA_077030	siderochrome-iron transporter Sit1, putative	1.03274
AFLA_077230	hypothetical protein	2.84058
AFLA_077380	sugar transporter, putative	1.39235
AFLA_077420	CAIB/BAIF family enzyme	2.20315
AFLA_077500	hypothetical protein	1.54159
AFLA_077700	conserved hypothetical protein	-2.92803
AFLA_077840	endoglucanase, putative	-4.1831
AFLA_077910	alpha-1,3-glucanase, putative	-1.85997
AFLA_078930	conserved hypothetical protein	1.78704
AFLA_079230	hypothetical protein	1.14084
AFLA_079360	PKS-like enzyme, putative	3.59066
AFLA_079390	hypothetical protein	3.01651
AFLA_079490	conserved hypothetical protein	1.29649
AFLA_079550	group II pyridoxal-5-phosphate decarboxylase, putative	-2.57526
AFLA_079610	conserved hypothetical protein	-7.93405
AFLA_079840	conserved hypothetical protein	-1.57849
AFLA_080190	hypothetical protein	-4.51824
AFLA_080900	aspartyl-tRNA synthetase, cytoplasmic	1.04331
AFLA_080940	P-type ATPase, putative	3.86343
AFLA_081160	conserved hypothetical protein	-2.36407
AFLA_081170	conserved hypothetical protein	-2.41913
AFLA_081390	pachytene checkpoint component Pch2, putative	-1.63336
AFLA_081970	conserved hypothetical protein	-1.63436
AFLA_082090	conserved hypothetical protein	4.01916
AFLA_082140	hypothetical protein	-7.77077
AFLA_082150	polyketide synthase, putative	-8.15511
AFLA_082210	conserved hypothetical protein	4.83825
AFLA_082380	alcohol dehydrogenase, putative	-4.48262
AFLA_082450	bicyclomycin resistance protein, putative	-1.78979
AFLA_082750	hypothetical protein	1.8662
AFLA_082790	conserved hypothetical protein	1.5197
AFLA_083200	glucose-inducible SAM-dependent methyltransferase Rrg1, putative	3.06701
AFLA_083270	GABA permease, putative	1.65508
AFLA_083280	hypothetical protein	1.92305
AFLA_083820	C6 finger domain protein, putative	1.01453
AFLA_083970	hypothetical protein	1.08059
AFLA_084290	conserved hypothetical protein	3.56249
AFLA_084370	conserved hypothetical protein	-1.01388
AFLA_084520	conserved hypothetical protein	-1.85484
AFLA_084660	2-isopropylmalate synthase	1.05157
AFLA_084890	aspartyl protease, putative	3.14236
AFLA_085640	hypothetical protein	4.85341
AFLA_085660	arsenic resistance protein ArsH	2.98983
AFLA_085860	hypothetical protein	3.07386
AFLA_085870	conserved hypothetical protein	-1.97386
AFLA_085950	alcohol dehydrogenase, putative	5.05436
AFLA_086530	ariadne RING finger, putative	-1.72292
AFLA_086950	conserved hypothetical protein	1.48262
AFLA_087170	extracellular serine-rich protein, putative	-3.04696
AFLA_087210	cell surface spherulin 4 family protein	-1.67448
AFLA_087510	conserved hypothetical protein	1.29489
AFLA_087700	hypothetical protein	1.62432
AFLA_087840	WD repeat protein	1.03733
AFLA_087850	conserved hypothetical protein	-1.3696
AFLA_087940	conserved hypothetical protein	1.49654
AFLA_088550	phospholipid methyltransferase	1.11706
AFLA_088610	lactonohydrolase, putative	-1.17653
AFLA_089320	hypothetical protein	1.23603
AFLA_089340	allantoate permease, putative	1.91253
AFLA_089410	hypothetical protein	1.27992
AFLA_089440	hypothetical protein	-5.18317
AFLA_089460	hypothetical protein	-3.39824
AFLA_089490	cytochrome b5 reductase, putative	-3.1244
AFLA_089550	endoglucanase, putative	-3.99758
AFLA_089600	hypothetical protein	-5.81485
AFLA_089930	rhamnogalacturonase A precursor, putative	1.18729
AFLA_089950	hypothetical protein	-4.03937
AFLA_089960	hypothetical protein	-2.53908
AFLA_090090	hypothetical protein	4.89668
AFLA_090190	dimethylallyl tryptophan synthase, putative	-1.69096
AFLA_090560	hypothetical protein	-8.09541
AFLA_090610	hypothetical protein	-2.68641
AFLA_091500	beta galactosidase, putative	4.70972
AFLA_091510	mitochondrial carrier protein ymc, putative	-1.38858
AFLA_091960	hypothetical protein	3.43133
AFLA_092020	hypothetical protein	-4.32309
AFLA_092050	hypothetical protein	3.54867
AFLA_092790	dicer-1, putative	-2.40671
AFLA_092930	hypothetical protein	3.26211
AFLA_093080	zinc finger protein, putative	1.36404
AFLA_093100	hypothetical protein	1.1262
AFLA_093510	hypothetical protein	-3.67408
AFLA_093830	AMP dependent ligase/synthetase, putative	1.69278
AFLA_094020	hypothetical protein	1.45097
AFLA_094220	hypothetical protein	-1.13531
AFLA_094440	spherulin 4-like cell surface protein, putative	2.17705
AFLA_094710	GTP-binding protein lepa, putative	1.29058
AFLA_095210	methionine aminopeptidase, type I, putative	1.02743
AFLA_095390	siderophore iron transporter, putative	2.36144
AFLA_095480	hypothetical protein	1.99386
AFLA_095720	hypothetical protein	1.31342
AFLA_095770	WD domain, G-beta repeat protein	-2.30353
AFLA_095800	short-chain dehydrogenases/reductase, putative	1.73699
AFLA_095960	chitin synthase D	5.0754
AFLA_095990	hypothetical protein	2.76865
AFLA_096120	arylsulfatase, putative	-3.24534
AFLA_096130	hypothetical protein	4.92634
AFLA_096150	MFS alpha-glucoside transporter, putative	1.76842
AFLA_096260	aromatic ring-opening dioxygenase family protein	4.08348
AFLA_096270	aldehyde dehydrogenase PutA	4.37757
AFLA_096280	hypothetical protein	2.80753
AFLA_096290	salicylate hydroxylase, putative	4.07935
AFLA_096300	acyl esterase	3.75294
AFLA_096310	Cupin domain protein	3.25488
AFLA_096400	FAD-dependent monooxygenase AtmM	-12.2953
AFLA_096500	MFS multidrug transporter, putative	2.88426
AFLA_096540	hypothetical protein	2.10447
AFLA_096690	exopolygalacturonase precursor, putative	1.44671
AFLA_097090	hypothetical protein	2.88626
AFLA_097180	sugar transporter, putative	3.58636
AFLA_097350	amino acid transporter, putative	1.61702
AFLA_097680	C6 transcription factor, putative	2.06527
AFLA_097810	hypothetical protein	4.69843
AFLA_097840	hypothetical protein	-1.19461
AFLA_097990	hypothetical protein	5.27022
AFLA_098150	aspartate aminotransferase, putative	-1.39399
AFLA_098410	hypothetical protein	-1.23619
AFLA_098560	hypothetical protein	2.44961
AFLA_098590	hypothetical protein	4.83752
AFLA_098820	hypothetical protein	2.64553
AFLA_099120	allantoate permease, putative	5.53025
AFLA_099550	hypothetical protein	2.64231
AFLA_099970	thiol methyltransferase, putative	4.6885
AFLA_100120	hypothetical protein	2.27675
AFLA_100130	hypothetical protein	2.02807
AFLA_100410	hypothetical protein	3.78066
AFLA_100420	amidase, putative	5.55349
AFLA_100620	polyamine transporter, putative	-1.17302
AFLA_101110	protein translocation complex subunit Sss1, putative	-1.07621
AFLA_101230	glutaminase GtaA	-3.62197
AFLA_101330	hypothetical protein	1.3814
AFLA_101580	hypothetical protein	3.95684
AFLA_101760	molybdenum cofactor biosynthesis protein Gephyrin, putative	1.5886
AFLA_101990	MFS sugar transporter, putative	2.85372
AFLA_102190	hypothetical protein	-3.36711
AFLA_102440	hypothetical protein	4.85389
AFLA_102450	nucleosome assembly protein, putative	2.84178
AFLA_102660	hypothetical protein	2.22166
AFLA_102910	RNA polymerase II mediator complex component Srb8, putative	1.01393
AFLA_104240	PKS-like enzyme, putative	1.2236
AFLA_104310	DUF567 domain protein	1.52935
AFLA_104330	hypothetical protein	-3.99128
AFLA_104570	hypothetical protein	4.37877
AFLA_104720	hypothetical protein	-2.67944
AFLA_104820	cytochrome P450 monooxygenase, putative	3.06563
AFLA_104840	tannase, putative	1.78377
AFLA_104850	siderophore iron transporter, putative	1.91801
AFLA_104870	integral membrane protein, putative	1.16386
AFLA_104920	cutinase, putative	2.58103
AFLA_104940	hypothetical protein	-1.65936
AFLA_105000	DUF636 domain protein	2.60812
AFLA_105040	hypothetical protein	2.9671
AFLA_105120	GNAT family acetyltransferase, putative	4.57964
AFLA_105230	hypothetical protein	-4.22084
AFLA_105290	3-beta hydroxysteroid dehydrogenase/isomerase, putative	2.95828
AFLA_105500	hypothetical protein	1.52475
AFLA_105540	MFS multidrug transporter, putative	2.31642
AFLA_105560	MFS transporter, putative	1.20256
AFLA_105690	hypothetical protein	2.52567
AFLA_106040	hypothetical protein	-5.15035
AFLA_106080	hypothetical protein	3.8327
AFLA_106290	alpha-ketoglutarate-dependent taurine dioxygenase	-1.63248
AFLA_106430	DNA repair helicase rad5,16, putative	-3.69446
AFLA_106450	GPI anchored CFEM domain protein	3.90031
AFLA_106620	MFS transporter, putative	-7.97022
AFLA_106660	hypothetical protein	1.16295
AFLA_106740	cytochrome P450, putative	-1.6202
AFLA_106770	2-amino-3-carboxymuconate-6-semialdehyde decarboxylase, putative	5.38082
AFLA_106950	UMTA methyltransferase family protein	3.92791
AFLA_107070	alpha-glucosidase, putative	5.83533
AFLA_107190	hypothetical protein	-2.70051
AFLA_107420	hypothetical protein	1.75583
AFLA_107680	hypothetical protein	2.09191
AFLA_107740	monoxygenase, putative	1.93274
AFLA_107770	hypothetical protein	2.30605
AFLA_107800	exo-beta-1,3-glucanase, putative	-1.42212
AFLA_107830	brain chitinase and chia, putative	1.87204
AFLA_107860	hypothetical protein	-3.93802
AFLA_108070	hypothetical protein	-1.65989
AFLA_108250	pantothenate transporter, putative	2.51554
AFLA_108270	formyltetrahydrofolate deformylase, putative	2.73407
AFLA_108480	hypothetical protein	3.47437
AFLA_108500	hypothetical protein	4.6785
AFLA_108560	O-methyltransferase, putative	-10.3188
AFLA_108650	mitochondrial uncoupling protein, putative	-1.01679
AFLA_108700	aminotransferase GliI-like, putative	-2.62692
AFLA_108720	ankyrin repeat protein	1.12473
AFLA_108860	1,3-beta-glucanosyltransferase Gel2	1.8105
AFLA_109390	hypothetical protein	-1.30941
AFLA_109440	long-chain-fatty-acid-CoA ligase, putative	4.23975
AFLA_109460	TfdA family taurine dioxygenase, putative	-1.08837
AFLA_109640	2-dehydro-3-deoxyglucarate aldolase, putative	2.59407
AFLA_109780	serine/threonine-protein kinase ripk4, putative	-1.1765
AFLA_110100	hypothetical protein	1.53848
AFLA_110260	flavin-binding monooxygenase-like protein	-1.70427
AFLA_110430	L-ornithine aminotransferase Car2, putative	1.21703
AFLA_110970	hypothetical protein	2.96577
AFLA_110990	short chain dehydrogenase, putative	-2.38016
AFLA_111250	hypothetical protein	-2.2156
AFLA_111280	hypothetical protein	-1.29231
AFLA_112870	monooxygenase, putative	1.17509
AFLA_113270	acid sphingomyelinase, putative	-3.0302
AFLA_113390	hypothetical protein	3.82591
AFLA_113540	hypothetical protein	1.78057
AFLA_113810	hypothetical protein	2.78907
AFLA_113830	dipeptidyl peptidase, putative	1.07861
AFLA_114420	hypothetical protein	-2.21658
AFLA_114520	hypothetical protein	3.2716
AFLA_114560	hypothetical protein	3.84623
AFLA_114710	hypothetical protein	-1.73448
AFLA_115830	hypothetical protein	-4.16095
AFLA_116000	phytanoyl-CoA dioxygenase family protein	1.72661
AFLA_116010	hypothetical protein	4.49707
AFLA_116020	hypothetical protein	-1.04032
AFLA_116040	pectin lyase B	1.98347
AFLA_116080	beta-glucosidase precursor, putative	1.15825
AFLA_116450	hypothetical protein	-6.21419
AFLA_116470	hypothetical protein	-1.04485
AFLA_116490	hypothetical protein	-1.36914
AFLA_116630	(S)-2-hydroxy-acid oxidase, putative	-5.26759
AFLA_116650	pectate lyase, putative	-2.38247
AFLA_116680	white collar, putative	-1.85739
AFLA_116750	MFS transporter, putative	2.13803
AFLA_116760	alpha-esterase, putative	6.27029
AFLA_116770	extracellular lipase, putative	4.28388
AFLA_116810	alpha-1,3-glucan synthase Ags3	2.84523
AFLA_116840	salicylate 1-monooxygenase SalA	2.83321
AFLA_116900	hypothetical protein	3.1121
AFLA_117160	hypothetical protein	-3.23551
AFLA_117280	2-methylcitrate dehydratase (PrpD), putative	2.0158
AFLA_117570	hypothetical protein	3.22087
AFLA_117670	glycosyl transferase, putative	-3.52329
AFLA_117820	C6 transcription factor, putative	-1.12972
AFLA_117910	hypothetical protein	3.76543
AFLA_118020	hypothetical protein	2.34776
AFLA_118080	protein RDR1, putative	1.58065
AFLA_118100	hypothetical protein	3.9195
AFLA_118400	hypothetical protein	-1.09979
AFLA_118480	hypothetical protein	8.83048
AFLA_118500	period circadian protein, putative	-2.77234
AFLA_118660	hypothetical protein	7.32918
AFLA_118690	hypothetical protein	2.72788
AFLA_118790	hypothetical protein	-9.44854
AFLA_119090	oxidoreductase, short chain dehydrogenase/reductase family, putative	-1.14645
AFLA_119310	hypothetical protein	1.56443
AFLA_119520	arrestin domain containing protein, putative	1.6092
AFLA_119690	hypothetical protein	3.12285
AFLA_119790	beta-xylosidase	2.5826
AFLA_119850	LsdA family protein	-6.08166
AFLA_119860	pectin lyase, putative	1.33733
AFLA_120050	integral membrane protein	2.14287
AFLA_120460	isocitrate lyase/malate synthase, putative	-1.6421
AFLA_120480	hypothetical protein	1.56799
AFLA_120550	allantoate permease, putative	4.79224
AFLA_120590	hypothetical protein	2.42225
AFLA_120730	alpha methylacyl-CoA racemase, putative	3.16111
AFLA_120790	MFS transporter, putative	-3.47332
AFLA_121140	hypothetical protein	-1.8563
AFLA_121150	hypothetical protein	-2.12923
AFLA_121240	phosphate-repressible phosphate permease, putative	2.17943
AFLA_121590	zinc-binding alcohol dehydrogenase, putative	2.53463
AFLA_121730	alpha-galactosidase C, putative	2.88123
AFLA_121920	hypothetical protein	4.82635
AFLA_121950	hypothetical protein	5.58596
AFLA_121970	pectate lyase, putative	4.78379
AFLA_121980	short chain dehydrogenase, putative	2.54717
AFLA_122190	cytochrome P450, putative	-5.08272
AFLA_122230	hypothetical protein	2.60285
AFLA_122250	cytochrome P450, putative	2.04762
AFLA_122260	pantothenate transporter, putative	2.62405
AFLA_122290	hypothetical protein	2.90103
AFLA_122340	hypothetical protein	4.65219
AFLA_122350	monoxygenase, putative	3.22518
AFLA_122380	arylsulfatase, putative	-2.00457
AFLA_122400	glucan 1,4-alpha-glucosidase, putative	-2.85723
AFLA_122500	C6 transcription factor, putative	1.17235
AFLA_122510	ABC multidrug transporter, putative	1.42313
AFLA_122980	integral membrane protein	1.49821
AFLA_122990	hypothetical protein	3.02842
AFLA_123130	adenosine deaminase, putative	4.06865
AFLA_123150	hypothetical protein	4.84508
AFLA_123170	amylase, putative	-1.09077
AFLA_123370	hypothetical protein	5.0717
AFLA_123400	sensor histidine kinase/response regulator, putative	1.10232
AFLA_123570	amino acid transporter, putative	4.40316
AFLA_123690	extracellular arabinanase, putative	-2.8276
AFLA_123720	short-chain dehydrogenases/reductase, putative	2.054
AFLA_123810	phytanoyl-CoA dioxygenase family protein	2.82459
AFLA_123850	hypothetical protein	1.75026
AFLA_123960	oligopeptide transporter, putative	-1.00933
AFLA_124140	beta lactamase domain, putative	1.71375
AFLA_124250	aminotriazole resistance protein, putative	-1.48517
AFLA_124260	adam, putative	-3.88423
AFLA_124340	hypothetical protein	2.75588
AFLA_124430	hypothetical protein	2.20178
AFLA_124500	nitric oxide synthase, putative	-12.1464
AFLA_124870	hypothetical protein	-1.75414
AFLA_124880	hypothetical protein	-1.62578
AFLA_124930	monooxygenase, putative	1.64735
AFLA_124970	ankyrin repeat containing protein	-4.1894
AFLA_124990	hypothetical protein	-1.04429
AFLA_125000	bicyclomycin resistance protein, putative	-1.9962
AFLA_125280	hypothetical protein	-7.99505
AFLA_125540	hypothetical protein	-2.20816
AFLA_125670	C6 transcription factor, putative	1.14066
AFLA_125800	hypothetical protein	-1.8204
AFLA_125900	metalloproteinase, putative	2.33475
AFLA_125970	epoxide hydrolase, putative	3.2269
AFLA_126190	hypothetical protein	5.76165
AFLA_126200	hypothetical protein	-2.95266
AFLA_126230	hypothetical protein	-3.27848
AFLA_126340	MFS sugar transporter Stl1, putative	3.10125
AFLA_126390	oxidoreductase 2-nitropropane dioxygenase family, putative	-2.5667
AFLA_126530	hypothetical protein	-6.29713
AFLA_126640	integral membrane protein Pth11-like, putative	4.81026
AFLA_126770	hypothetical protein	-2.10675
AFLA_126780	beta-glucosidase 2 precursor, putative	5.80659
AFLA_126950	alcohol dehydrogenase, putative	5.31683
AFLA_127010	hypothetical protein	1.98084
AFLA_127090	polyketide synthase, putative	2.81042
AFLA_127480	MFS multidrug transporter, putative	2.30567
AFLA_127520	glucose-methanol-choline (gmc) oxidoreductase, putative	3.49425
AFLA_127550	hypothetical protein	-4.7928
AFLA_127610	high expression lethality protein Hel10, putative	-1.65241
AFLA_127780	hypothetical protein	1.36345
AFLA_128110	aquaglyceroporin, putative	-5.97678
AFLA_128120	cell wall glucanase, putative	1.07484
AFLA_128210	protein kinase, putative	2.46991
AFLA_128470	efflux pump antibiotic resistance protein, putative	-1.28875
AFLA_128870	feruloyl esterase, putative	1.28048
AFLA_129100	exo-beta-1,3-glucanase, putative	-1.06469
AFLA_129140	rootletin, putative	-5.25199
AFLA_129380	cytochrome P450, putative	2.61016
AFLA_129510	aconitase, putative	3.12264
AFLA_129800	pantothenate transporter, putative	-4.85298
AFLA_131580	BCS1-like ATPase, putative	2.20001
AFLA_131610	cytidine deaminase, putative	1.47804
AFLA_131770	extracellular exo-polygalacturonase, putative	1.37712
AFLA_131800	flavin-binding monooxygenase, putative	-3.30155
AFLA_132010	hypothetical protein	1.12769
AFLA_132060	hypothetical protein	3.85303
AFLA_132240	FMN-dependent dehydrogenase family protein	-1.80515
AFLA_132430	polyglutamate biosynthesis protein, putative	2.81622
AFLA_132940	vacuolar ABC heavy metal transporter (Hmt1), putative	-2.33899
AFLA_133270	Yippee zinc-binding protein Moh1, putative	-1.29142
AFLA_133670	hypothetical protein	3.3486
AFLA_133810	hypothetical protein	-4.31279
AFLA_133960	dihydroorotate reductase PyrE, putative	1.08003
AFLA_134310	hypothetical protein	1.72765
AFLA_134320	C6 finger domain protein, putative	1.8137
AFLA_134790	pyruvate dehydrogenase kinase	1.00259
AFLA_134830	phospholipase A2 (PlaA), putative	1.21405
AFLA_134850	hypothetical protein	-1.45314
AFLA_135500	hypothetical protein	3.71779
AFLA_135730	hypothetical protein	-1.71157
AFLA_136220	3,2-trans-enoyl-CoA isomerase, putative	5.49238
AFLA_136380	hypothetical protein	3.08941
AFLA_137090	hypothetical protein	-1.62185
AFLA_137120	integral membrane protein	-1.66798
AFLA_137370	hypothetical protein	-1.23611
AFLA_137660	hypothetical protein	2.13857
AFLA_137720	hypothetical protein	-1.90854
AFLA_137940	hypothetical protein	-2.72914
AFLA_138170	exopolygalacturonase precursor, putative	1.66236
AFLA_138310	hypothetical protein	-5.73575
AFLA_138320	hypothetical protein	1.36429
AFLA_138370	hypothetical protein	-1.53255
AFLA_138380	endoglucanase, putative	-1.79278
AFLA_138680	pentachlorophenol 4-monooxygenase, putative	2.59843
AFLA_138690	hypothetical protein	-11.0356
AFLA_138720	AMP dependent ligase/synthetase, putative	1.03687
AFLA_138920	monooxygenase, putative	3.27693
AFLA_138950	alcohol dehydrogenase, putative	1.84663
AFLA_139100	aflYe/ orf/ Ser -Thr protein phosphatase family protein	1.05485
AFLA_139140	aflYa/ nadA/ NADH oxidase	-3.66604
AFLA_139150	aflY/ hypA/ hypP/ hypothetical protein	-2.56769
AFLA_139160	aflX/ ordB/ monooxygenase/ oxidase	-2.34455
AFLA_139170	aflW/ moxY/ monooxygenase	-2.27642
AFLA_139180	aflV/ cypX/ cytochrome P450 monooxygenase	-3.16739
AFLA_139200	aflQ/ ordA/ ord-1/ oxidoreductase/ cytochrome P450 monooxigenase	-4.29061
AFLA_139220	aflO/ omtB/ dmtA/ O-methyltransferase B	-2.94881
AFLA_139260	aflG/ avnA/ ord-1/ cytochrome P450 monooxygenase	-3.05019
AFLA_139320	aflJ/ estA/ esterase	-2.0158
AFLA_139340	aflS/ pathway regulator	-1.37733
AFLA_139360	aflR / apa-2 / afl-2 / transcription activator	-5.3899
AFLA_139390	aflD / nor-1 / reductase	-1.37734
AFLA_139400	aflCa / hypC / hypothetical protein	-1.99184
AFLA_139470	FAD dependent oxidoreductase, putative	-6.2575

## Sheet: Down in Infection hbx1 6 h 
AFLA ID	Description	6 h
AFLA_000330	Ankyrin domain protein	-1.59526
AFLA_000350	NAD dependent epimerase/dehydratase, putative	-2.50906
AFLA_000510	hypothetical protein	1.62217
AFLA_000640	polyamine oxidase, putative	-1.00979
AFLA_000840	efflux pump antibiotic resistance protein, putative	2.84908
AFLA_000870	hypothetical protein	-3.58505
AFLA_000890	laccase TilA	-2.7136
AFLA_001020	cytochrome P450 monooxygenase, putative	2.16261
AFLA_001560	short-chain dehydrogenase, putative	-1.39503
AFLA_001570	hypothetical protein	-1.46782
AFLA_001600	D-amino acid oxidase, putative	-1.94977
AFLA_001640	glycosyl hydrolase, putative	-1.70887
AFLA_001660	hypothetical protein	-1.10123
AFLA_002020	spherulin 4-like cell surface protein, putative	1.43359
AFLA_002660	hypothetical protein	1.52262
AFLA_003080	hypothetical protein	-2.42141
AFLA_003170	caffeine resistance protein, putative	-1.70335
AFLA_003960	hypothetical protein	-1.01679
AFLA_004260	MFS transporter, putative	-2.15572
AFLA_004460	fatty acid desaturase family protein	1.10714
AFLA_005130	L-lysine 2,3-aminomutase, putative	-1.05001
AFLA_005430	hypothetical protein	1.21537
AFLA_005440	nonribosomal peptide synthase, putative	1.70825
AFLA_006020	hypothetical protein	3.96303
AFLA_007370	hypothetical protein	-1.20598
AFLA_007450	O-methyltransferase, putative	-2.04813
AFLA_007560	F5/8 type C domain protein	4.47785
AFLA_007630	integral membrane protein, Mpv17/PMP22 family, putative	-1.38354
AFLA_008120	hypothetical protein	-1.31321
AFLA_008130	MFS transporter, putative	-3.25059
AFLA_008210	NF-X1 finger and helicase domain protein, putative	1.59848
AFLA_008640	ferric-chelate reductase, putative	-1.95808
AFLA_008660	hypothetical protein	-2.4199
AFLA_008740	oxidoreductase, short chain dehydrogenase/reductase family	-2.66311
AFLA_008850	hypothetical protein	1.5944
AFLA_009020	cytochrome c peroxidase, putative	1.09592
AFLA_009140	PKS-like enzyme, putative	-2.33359
AFLA_009260	hypothetical protein	-1.66835
AFLA_009320	hypothetical protein	8.20762
AFLA_009410	delta(3,5)-delta(2,4)-dienoyl-CoA isomerase, mitochondrial precursor, putative	-1.53836
AFLA_009420	hypothetical protein	-3.50408
AFLA_009550	xylosidase/arabinosidase, putative	-3.38104
AFLA_009580	C6 transcription factor, putative	-2.41128
AFLA_010120	extracellular dioxygenase, putative	-1.11133
AFLA_010740	lysosomal protective protein precursor, putative	-1.52246
AFLA_010890	sterol desaturase, putative	1.04857
AFLA_010950	cytochrome P450 oxidoreductase, putative	-6.29624
AFLA_011040	hypothetical protein	2.16926
AFLA_011210	hypothetical protein	-2.62147
AFLA_011220	glucose dehydrogenase, putative	-2.68756
AFLA_011230	glycosyl hydrolase, putative	-1.25061
AFLA_011550	tannase, putative	-1.16272
AFLA_012020	carboxypeptidase S1, putative	-1.40344
AFLA_012100	NDT80_PhoG domain protein PcaG	-1.3881
AFLA_012940	sulfatase, putative	1.65893
AFLA_013060	conserved hypothetical protein	-2.59719
AFLA_013130	hypothetical protein	-1.07173
AFLA_013170	hypothetical protein	-1.14609
AFLA_013550	hypothetical protein	-2.18206
AFLA_013590	conserved hypothetical protein	-1.87407
AFLA_014020	conserved hypothetical protein	-1.74913
AFLA_014110	conserved hypothetical protein	-1.88612
AFLA_014130	conserved hypothetical protein	-1.89151
AFLA_014140	aldehyde dehydrogenase family protein, putative	-1.24546
AFLA_014280	conserved hypothetical protein	-3.90235
AFLA_014390	efflux pump antibiotic resistance protein, putative	-1.11573
AFLA_015610	conserved hypothetical protein	-2.24757
AFLA_015630	conserved hypothetical protein	-1.4577
AFLA_015780	small oligopeptide transporter, OPT family	-1.30164
AFLA_015790	C6 transcription factor (Leu3), putative	-1.18691
AFLA_015800	DUF636 domain protein	-1.85184
AFLA_015820	hypothetical protein	-1.34131
AFLA_015970	1-aminocyclopropane-1-carboxylate oxidase, putative	-1.52135
AFLA_016090	conserved hypothetical protein	-1.51898
AFLA_016290	zinc alcohol dehydrogenase, putative	-1.95083
AFLA_016360	PAF acetylhydrolase family protein	1.1889
AFLA_016400	glutathione S-transferase, putative	-1.5476
AFLA_016540	conserved hypothetical protein	1.45184
AFLA_016550	conserved hypothetical protein	2.13055
AFLA_016580	conserved hypothetical protein	-1.8611
AFLA_017740	conserved hypothetical protein	-3.2816
AFLA_018110	bZIP transcription factor, putative	-1.05706
AFLA_018230	short-chain dehydrogenase, putative	-2.88433
AFLA_018240	uridine permease Fui1, putative	-2.57845
AFLA_018790	nitrate transporter CrnA	1.99531
AFLA_018810	nitrate reductase NiaD	1.0116
AFLA_018890	factor for adipocyte differentiation, putative	-4.57416
AFLA_018910	elastase, putative	1.23677
AFLA_019120	conserved hypothetical protein	3.68128
AFLA_019180	CipC-like antibiotic response protein, putative	-1.37289
AFLA_019190	aspartyl protease, putative	-4.14199
AFLA_019210	short-chain dehydrogenase, putative	-1.63292
AFLA_019250	mercuric reductase, putative	-3.07281
AFLA_019260	short-chain dehydrogenase, putative	1.71438
AFLA_019460	conserved hypothetical protein	-2.20162
AFLA_019510	conserved hypothetical protein	-1.27855
AFLA_019540	glucose dehydrogenase, putative	5.04298
AFLA_020900	major centromere autoantigen B, putative	-1.47568
AFLA_021180	profilin, putative	2.48945
AFLA_021400	vanillate O-demethylase oxidoreductase, putative	-2.14202
AFLA_022190	hypothetical protein	1.43459
AFLA_022340	glutamate synthase Glt1, putative	-1.25931
AFLA_022800	conserved hypothetical protein	1.49807
AFLA_022880	oligopeptide transporter, putative	-1.09904
AFLA_022990	conserved hypothetical protein	-1.34944
AFLA_023080	integral membrane protein TmpA	-3.77661
AFLA_023170	MFS transporter, putative	-1.53106
AFLA_023440	acyltransferase, putative	-2.32272
AFLA_023540	ABC multidrug transporter, putative	1.56188
AFLA_023610	conserved hypothetical protein	-1.03836
AFLA_023720	phosphocarrier protein HPr, putative	-4.18321
AFLA_023770	conserved hypothetical protein	-1.67213
AFLA_023780	alcohol dehydrogenase, putative	-3.48025
AFLA_023880	conserved hypothetical protein	-1.26664
AFLA_023900	hypothetical protein	1.88551
AFLA_024030	2-haloalkanoic acid dehalogenase, putative	-1.05679
AFLA_024040	fungal specific transcription factor, putative	-1.40384
AFLA_024080	cytochrome p450, putative	-5.83807
AFLA_024090	efflux pump antibiotic resistance protein, putative	-5.70495
AFLA_024100	conserved hypothetical protein	-5.10603
AFLA_024120	conserved hypothetical protein	-2.17686
AFLA_024160	kinesin light chain, putative	-1.68691
AFLA_024300	amidase, putative	-2.00224
AFLA_024460	conserved hypothetical protein	-1.02325
AFLA_024540	sensory transduction histidine kinase, putative	1.12112
AFLA_024570	hypothetical protein	-1.47458
AFLA_024600	short chain oxidoreductase (CsgA), putative	-1.45789
AFLA_024700	short-chain alcohol dehydrogenase, putative	-1.27489
AFLA_024740	C6 transcription factor, putative	-1.55023
AFLA_024760	conserved hypothetical protein	-9.81451
AFLA_024920	DUF221 domain protein, putative	-2.28402
AFLA_024980	hypothetical protein	-1.90652
AFLA_025380	conserved hypothetical protein	-1.4261
AFLA_025390	high affinity zinc ion transporter, putative	-3.27729
AFLA_026350	conserved hypothetical protein	2.14924
AFLA_026660	stress responsive A/B barrel domain protein	-3.08576
AFLA_027810	alkaline serine protease Alp1	-1.019
AFLA_027980	NUDIX domain, putative	1.38286
AFLA_028260	exo-beta-1,3-glucanase (Exg1), putative	1.9364
AFLA_029660	urea transporter (Dur3), putative	-1.7243
AFLA_030250	C-14 sterol reductase, putative	2.62229
AFLA_030290	hypothetical protein	1.16975
AFLA_030810	conserved hypothetical protein	-2.70293
AFLA_031880	RTA1 domain protein, putative	2.41539
AFLA_031890	kinesin, putative	1.40859
AFLA_032010	FAD binding domain protein	-1.00955
AFLA_032420	conserved hypothetical protein	-1.95029
AFLA_032930	conserved hypothetical protein	-1.51712
AFLA_032940	conserved hypothetical protein	-2.89532
AFLA_033410	conserved hypothetical protein	-2.1476
AFLA_033420	Mn superoxide dismutase MnSOD	-2.90463
AFLA_033750	H+/nucleoside cotransporter	1.0187
AFLA_033860	hypothetical protein	-2.47011
AFLA_034140	monocarboxylate permease, putative	-1.03503
AFLA_034380	catalase, putative	-1.44007
AFLA_034410	aspartate aminotransferase, putative	-2.1473
AFLA_034780	conserved hypothetical protein	-1.07949
AFLA_034900	hypothetical protein	1.08431
AFLA_034930	hypothetical protein	2.21211
AFLA_035520	nucleoside transporter, putative	1.00359
AFLA_035580	alcohol dehydrogenase, putative	3.50481
AFLA_035680	hydrolase, putative	-1.45567
AFLA_035920	conserved hypothetical protein	-2.10866
AFLA_036570	hypothetical protein	2.17557
AFLA_036950	hypothetical protein	1.28774
AFLA_037160	thiazole biosynthesis enzyme Sti35	1.48142
AFLA_037280	hypothetical protein	3.55106
AFLA_037710	phosphomannomutase (Sec53), putative	1.84889
AFLA_038530	elastinolytic metalloproteinase Mep	-2.43579
AFLA_038580	RTA1 domain protein	-1.50142
AFLA_038640	fatty acid synthase alpha subunit, putative	-1.03507
AFLA_038760	mandelate racemase, putative	3.33003
AFLA_038830	hypothetical protein	-2.31317
AFLA_038880	amidohydrolase family protein	-1.02091
AFLA_039010	hypothetical protein	-1.31073
AFLA_039220	cytochrome P450, putative	-1.88834
AFLA_039230	short-chain dehydrogenase, putative	-2.24682
AFLA_039240	aristolochene synthase, putative	-1.47036
AFLA_039250	hypothetical protein	-3.83293
AFLA_039400	extracellular guanyl-specific ribonuclease RntA	-2.24751
AFLA_039520	hypothetical protein	-2.19918
AFLA_039550	glutamyl-tRNA(gln) amidotransferase subunit A, putative	1.25376
AFLA_039810	DUF1212 domain membrane protein	-2.81297
AFLA_039960	hypothetical protein	-1.86877
AFLA_040290	hypothetical protein	-1.42527
AFLA_040400	hypothetical protein	-1.57779
AFLA_040920	alpha methylacyl-CoA racemase, putative	-1.31666
AFLA_040960	N-hydroxyarylamine O-acetyltransferase, putative	-1.11973
AFLA_041150	cenp-B, putative	1.97274
AFLA_041350	sulfonylurea receptor/ ABC transporter, putative	-1.29648
AFLA_041670	hypothetical protein	-1.16397
AFLA_041680	MFS drug transporter, putative	-4.97303
AFLA_041690	cysteine synthase B, putative	-4.75661
AFLA_041700	ferric-chelate reductase, putative	-3.24166
AFLA_042010	zinc-dependent alcohol dehydrogenase, putative	1.22977
AFLA_042180	hypothetical protein	-3.49192
AFLA_042220	hypothetical protein	-1.24412
AFLA_042270	dynamin GTPase, putative	1.16027
AFLA_042300	hypothetical protein	2.71196
AFLA_042400	AMP-binding enzyme family protein	-2.57231
AFLA_042440	efflux pump antibiotic resistance protein, putative	-1.87943
AFLA_042580	short chain alcohol dehydrogenase, putative	-1.49442
AFLA_042770	vitamin H transporter, putative	-5.44954
AFLA_042890	hypothetical protein	-3.22456
AFLA_043000	transmembrane protein UsgS	-1.15701
AFLA_043470	ankyrin repeat-containing protein, putative	1.08364
AFLA_043990	hypothetical protein	1.52909
AFLA_044050	gaba-specific permease, putative	1.00905
AFLA_044390	NAD binding Rossmann fold oxidoreductase, putative	4.79871
AFLA_045050	hypothetical protein	-2.15396
AFLA_045200	hypothetical protein	1.14234
AFLA_045380	dimeric dihydrodiol dehydrogenase, putative	3.37756
AFLA_045490	dimethylallyl tryptophan synthase, putative	1.82264
AFLA_045520	integral membrane protein	-1.00364
AFLA_045660	multicopper oxidase/laccase, putative	1.51765
AFLA_045680	GNAT family acetyltransferase, putative	1.68456
AFLA_046190	nickel transport protein, putative	-2.85083
AFLA_047130	hypothetical protein	-1.03185
AFLA_049170	hypothetical protein	-1.09564
AFLA_049520	hypothetical protein	1.83829
AFLA_050200	hypothetical protein	2.42958
AFLA_050220	hypothetical protein	3.29999
AFLA_050300	HMG box protein, putative	1.38691
AFLA_050380	hypothetical protein	-1.40286
AFLA_050610	acid phosphatase PHOa	-3.6357
AFLA_051900	zinc knuckle transcription factor (CnjB), putative	3.89304
AFLA_053360	hypothetical protein	1.31614
AFLA_053410	hypothetical protein	-2.37038
AFLA_053620	geranylgeranyl pyrophosphate synthase, putative	-1.77478
AFLA_053650	oxidoreductase, short chain dehydrogenase/reductase family	-1.23926
AFLA_053980	DUF636 domain protein	-1.65062
AFLA_054500	penicillin-binding protein, putative	-1.53031
AFLA_054960	acetamidase	1.97315
AFLA_055680	esterase, putative	-1.42014
AFLA_056580	hypothetical protein	4.01882
AFLA_056870	hypothetical protein	-2.92718
AFLA_057110	hypothetical protein	-1.0424
AFLA_057290	hypothetical protein	2.07656
AFLA_057480	hypothetical protein	-4.38813
AFLA_057500	hypothetical protein	-3.38119
AFLA_057580	hypothetical protein	-1.3331
AFLA_057900	glutathione S-transferase GST-6.0, putative	1.28678
AFLA_058030	MFS transporter, putative	-1.97228
AFLA_058050	glyoxylate carboligase, putative	1.38793
AFLA_058580	GTP cyclohydrolase II, putative	-1.24756
AFLA_058680	oxidoreductase, 2OG-Fe(II) oxygenase family, putative	-1.9684
AFLA_058890	oxidoreductase, putative	-2.33744
AFLA_058950	spore wall maturation protein DIT1, putative	-1.5614
AFLA_058970	cytochrome P450, putative	-1.17152
AFLA_058980	hypothetical protein	-3.71627
AFLA_058990	bicyclomycin resistance protein, putative	-3.34446
AFLA_059000	pantothenate transporter, putative	-3.7986
AFLA_059250	class II aldolase/adducin domain protein	-1.42248
AFLA_059980	choline dehydrogenase, putative	1.08451
AFLA_059990	O-methyltransferase, putative	-1.06996
AFLA_060000	metallo-beta-lactamase domain protein	-2.36631
AFLA_060020	PKS-like enzyme, putative	2.00794
AFLA_060080	ABC transporter, putative	-3.91673
AFLA_060090	hypothetical protein	-3.41446
AFLA_060100	hypothetical protein	-1.92748
AFLA_060130	NACHT and WD40 domain protein	-2.10344
AFLA_060340	hypothetical protein	-1.71379
AFLA_060780	hydrophobin family protein	2.06483
AFLA_060800	kinesin family protein	2.4188
AFLA_060880	amino acid permease, putative	-4.42417
AFLA_061070	hmg-CoA reductase, putative	-1.09884
AFLA_061110	mono- and diacylglycerol lipase precursor, putative	-6.12207
AFLA_061280	alcohol dehydrogenase, putative	-2.61226
AFLA_062030	carbonic anhydrase, putative	2.16992
AFLA_062800	aldo-keto reductase, putative	-1.10159
AFLA_062860	polyketide synthase, putative	-1.53359
AFLA_063140	hypothetical protein	2.15859
AFLA_063220	hypothetical protein	-1.01379
AFLA_063260	hypothetical protein	2.83393
AFLA_063270	hypothetical protein	2.16322
AFLA_063290	hypothetical protein	2.34589
AFLA_063300	hypothetical protein	2.31996
AFLA_063580	short chain type dehydrogenase, putative	-1.10064
AFLA_063630	1-aminocyclopropane-1-carboxylate oxidase, putative	-4.22719
AFLA_063660	polysaccharide deacetylase family protein	-1.11946
AFLA_064190	hypothetical protein	-2.8413
AFLA_064280	N-methyltransferase, putative	-4.52668
AFLA_064300	fructosyl amino acid oxidase, putative	-1.95676
AFLA_064320	oligopeptide transporter, putative	-1.37947
AFLA_064330	hypothetical protein	-7.35247
AFLA_064340	hypothetical protein	-1.91713
AFLA_064360	ABC multidrug transporter, putative	-1.94285
AFLA_064410	hypothetical protein	-3.9556
AFLA_064440	transport protein, putative	-6.69311
AFLA_064600	hypothetical protein	-6.18858
AFLA_064860	nuclease S1 precursor, putative	-5.62748
AFLA_065260	hypothetical protein	-3.14082
AFLA_065300	protease inhibitor (Tfs1), putative	-1.38631
AFLA_065330	malate dehydrogenase, putative	-1.51684
AFLA_065380	hypothetical protein	-1.51898
AFLA_065460	hypothetical protein	-2.39343
AFLA_065540	extracellular lipase, putative	-2.85223
AFLA_065720	aldehyde dehydrogenase, putative	-1.23871
AFLA_065730	guanine deaminase, putative	-1.48764
AFLA_066220	allantoate permease, putative	-1.51198
AFLA_066410	ATP-grasp superfamily protein	1.24169
AFLA_066770	oxidoreductase, FAD-binding, putative	-3.72468
AFLA_066890	cytochrome P450, putative	-3.57539
AFLA_066920	alcohol dehydrogenase, putative	1.36018
AFLA_067110	MFS peptide transporter, putative	2.98673
AFLA_067170	hypothetical protein	-1.01512
AFLA_067200	ABC multidrug transporter, putative	-2.20721
AFLA_067550	1,4-beta-D-glucan-cellobiohydrolyase, putative	1.30164
AFLA_067740	hypothetical protein	-1.47546
AFLA_068290	hypothetical protein	1.4139
AFLA_068450	hypothetical protein	-1.83283
AFLA_068600	ammonium transporter MepA	1.44097
AFLA_069900	hypothetical protein	1.2414
AFLA_070330	kinesin light chain, putative	-1.01384
AFLA_070340	F-box domain protein	-1.34701
AFLA_071150	alcohol dehydrogenase, putative	1.06906
AFLA_071910	MFS tranporter, putative	-1.02089
AFLA_072670	zinc-iron transporter, putative	1.8352
AFLA_072780	sarcosine oxidase, putative	-1.32216
AFLA_072790	conserved hypothetical protein	-1.91315
AFLA_073140	cytochrome P450, putative	1.6356
AFLA_073220	hypothetical protein	1.16753
AFLA_073380	conserved hypothetical protein	1.23404
AFLA_073390	3-oxoacyl-[acyl-carrier-protein] reductase, putative	2.01324
AFLA_073930	MFS transporter, putative	-1.07376
AFLA_074380	salicylate hydroxylase, putative	-1.18783
AFLA_074440	hypothetical protein	2.36895
AFLA_074660	conserved hypothetical protein	1.1586
AFLA_074690	quinone oxidoreductase, putative	1.09929
AFLA_074820	conserved hypothetical protein	-1.43369
AFLA_074840	amino acid transporter, putative	-2.42715
AFLA_074960	conserved hypothetical protein	-2.50496
AFLA_075340	hypothetical protein	-1.57494
AFLA_075370	FAD binding domain protein	-2.78562
AFLA_075500	conserved hypothetical protein	-1.94728
AFLA_075690	periplasmic beta-glucosidase precursor, putative	-4.06207
AFLA_075900	conserved hypothetical protein	1.11337
AFLA_076150	hypothetical protein	1.23584
AFLA_076330	conserved hypothetical protein	-1.21866
AFLA_076530	sugar transporter family protein	-1.12812
AFLA_076990	alpha-ketoglutarate-dependent taurine dioxygenase	1.58577
AFLA_077470	thimet oligopeptidase, putative	-1.01178
AFLA_077650	conserved hypothetical protein	-2.3863
AFLA_077920	glutamate decarboxylase	-5.52057
AFLA_077950	toxin biosynthesis protein (Tri7), putative	-1.38456
AFLA_078040	(S)-2-haloacid dehalogenase IVA, putative	-5.78791
AFLA_078050	cytochrome P450 monooxygenase, putative	-3.03624
AFLA_078080	conserved hypothetical protein	-1.1469
AFLA_078140	acetyltransferase, GNAT family	-3.408
AFLA_078350	conserved hypothetical protein	2.95157
AFLA_078440	integral membrane protein	-2.35853
AFLA_078840	MFS transporter, putative	-1.23259
AFLA_079380	NRPS-like enzyme, putative	2.00098
AFLA_079520	conserved hypothetical protein	-2.29999
AFLA_079600	acyl-CoA:6-aminopenicillanic-acid-acyltransferase, putative	-1.05586
AFLA_079850	phosphatidyl synthase	-1.07737
AFLA_079990	hypothetical protein	1.25956
AFLA_080500	cation-transporting ATPase, putative	1.45277
AFLA_080560	conserved hypothetical protein	-1.00846
AFLA_080980	conserved hypothetical protein	-1.08677
AFLA_081070	conserved hypothetical protein	-3.52737
AFLA_081690	hypothetical protein	-1.11139
AFLA_081770	conserved hypothetical protein	-4.0231
AFLA_081990	conserved hypothetical protein	1.51682
AFLA_082360	conserved hypothetical protein	1.51337
AFLA_082430	conserved hypothetical protein	-1.13778
AFLA_082460	conserved hypothetical protein	-1.44381
AFLA_082730	conserved hypothetical protein	1.44587
AFLA_082890	ribonuclease T2, putative	1.05197
AFLA_083610	glutathione S-transferase, putative	1.38872
AFLA_083710	hypothetical protein	1.30876
AFLA_083800	conserved hypothetical protein	1.40606
AFLA_084810	conserved hypothetical protein	2.41494
AFLA_084830	hypothetical protein	-1.68955
AFLA_084860	conserved hypothetical protein	-1.70455
AFLA_085020	class II aldolase/adducin domain protein	1.3732
AFLA_085700	arsenate reductase (Arc2), putative	-1.56778
AFLA_085810	OPT peptide transporter Mtd1, putative	1.45724
AFLA_085820	conserved hypothetical protein	-1.67391
AFLA_086650	conserved hypothetical protein	-1.41976
AFLA_087020	hypothetical protein	1.91466
AFLA_087060	GMC oxidoreductase, putative	1.2935
AFLA_087190	hypothetical protein	-1.99448
AFLA_087320	GABA permease GabA	-1.00603
AFLA_087620	NmrA family transcriptional regulator, putative	-1.00608
AFLA_089500	plasma membrane calcium-transporting ATPase, putative	-2.52634
AFLA_089510	vacuolar calcium ion transporter, putative	-2.65635
AFLA_089520	vacuolar calcium ion transporter, putative	-2.06408
AFLA_089540	hypothetical protein	1.47742
AFLA_089590	hypothetical protein	-1.00309
AFLA_089900	cofilin, actophorin, putative	-2.26854
AFLA_090020	oligopeptide transporter, putative	-1.00895
AFLA_090220	integral membrane protein	-5.77633
AFLA_090450	proline oxidase Put1, putative	-3.7941
AFLA_090460	protein kinase, putative	1.07813
AFLA_090470	srpk, putative	1.6253
AFLA_091070	hypothetical protein	-1.64877
AFLA_093530	oxidoreductase, 2OG-Fe(II) oxygenase family	-1.54113
AFLA_094120	hypothetical protein	-6.56027
AFLA_094270	hypothetical protein	-6.19431
AFLA_094290	MATE efflux family protein subfamily, putative	-1.94767
AFLA_094450	aspartic endopeptidase Pep1/aspergillopepsin F	-2.07879
AFLA_094580	hypothetical protein	-1.16804
AFLA_094620	hypothetical protein	-1.87923
AFLA_095120	efflux pump antibiotic resistance protein, putative	-1.11631
AFLA_095310	hypothetical protein	1.61452
AFLA_095430	hypothetical protein	-1.10154
AFLA_096380	FAD dependent oxidoreductase, putative	-2.32538
AFLA_097290	hypothetical protein	-2.50945
AFLA_097300	hypothetical protein	-1.72067
AFLA_097320	hypothetical protein	-1.98453
AFLA_097550	hypothetical protein	-1.24685
AFLA_097610	gluconolactonase precursor, putative	3.91795
AFLA_097650	hypothetical protein	2.49683
AFLA_098380	conidial hydrophobin RodA/RolA	4.331
AFLA_098620	hypothetical protein	-1.63442
AFLA_098700	carbonyl reductase, putative	-1.39568
AFLA_098780	hypothetical protein	-1.0116
AFLA_098840	L-amino acid oxidase, putative	1.13999
AFLA_098910	hypothetical protein	1.56445
AFLA_099050	hypothetical protein	-1.47094
AFLA_099360	hypothetical protein	1.2097
AFLA_099710	oxidoreductase, short-chain dehydrogenase/reductase family	1.78485
AFLA_099750	epoxide hydrolase, putative	1.5028
AFLA_099870	alpha/beta hydrolase, putative	1.53005
AFLA_099930	hypothetical protein	1.12325
AFLA_100290	aliphatic nitrilase, putative	1.44187
AFLA_100300	C6 transcription factor, putative	-1.02969
AFLA_100380	hypothetical protein	1.99328
AFLA_100400	hypothetical protein	1.55555
AFLA_100540	oxidoreductase, putative	-1.75069
AFLA_100610	hypothetical protein	-1.44525
AFLA_100680	hypothetical protein	-1.47921
AFLA_101920	extracellular developmental signal biosynthesis protein FluG	1.39548
AFLA_102000	hypothetical protein	-1.40893
AFLA_102070	hypothetical protein	3.54674
AFLA_102390	hypothetical protein	-1.78196
AFLA_102490	hypothetical protein	-3.55402
AFLA_102590	hypothetical protein	-1.27607
AFLA_102640	exo-beta-1,3-glucanase, putative	-1.33925
AFLA_103580	serum paraoxonase/arylesterase family protein	1.38815
AFLA_104510	methyltransferase family protein	-3.2576
AFLA_104520	hypothetical protein	-1.93829
AFLA_104700	monoxygenase, putative	-1.16396
AFLA_104760	acid phosphatase, putative	-1.19425
AFLA_104800	hypothetical protein	-1.90589
AFLA_104970	hypothetical protein	-1.0822
AFLA_105060	NAD dependent epimerase/dehydratase, putative	-3.0187
AFLA_105270	hypothetical protein	2.79024
AFLA_105330	hypothetical protein	-1.25566
AFLA_105600	hypothetical protein	-1.66657
AFLA_106110	hypothetical protein	-1.79228
AFLA_106880	aldehyde reductase (AKR1), putative	-1.8145
AFLA_107410	glucose-methanol-choline (gmc) oxidoreductase, putative	1.80222
AFLA_107560	oxidoreductase, 2OG-Fe(II) oxygenase family, putative	-1.23477
AFLA_107610	NmrA-like family protein	-2.69941
AFLA_107960	hypothetical protein	1.69621
AFLA_107990	lysosomal protective protein precursor, putative	-2.72455
AFLA_108040	hypothetical protein	-8.33493
AFLA_108050	hypothetical protein	1.71864
AFLA_108240	amidohydrolase, putative	-1.21605
AFLA_108260	ammonium transporter, putative	-5.47952
AFLA_108280	hypothetical protein	-2.37106
AFLA_108310	hypothetical protein	2.02244
AFLA_108330	carboxy-cis,cis-muconate cyclase, putative	-1.00349
AFLA_108430	hypothetical protein	-2.35957
AFLA_108690	hypothetical protein	-2.84757
AFLA_108710	quinone oxidoreductase, putative	1.03022
AFLA_109150	C2H2 finger domain protein (Ezf), putative	1.72648
AFLA_109220	C6 transcription factor, putative	-2.80213
AFLA_109490	glutamate carboxypeptidase, putative	5.62571
AFLA_109520	zinc-iron transporter, putative	-1.1476
AFLA_110180	hypothetical protein	1.30323
AFLA_110410	phosphate transporter	-1.18286
AFLA_112890	MFS transporter, putative	-2.91444
AFLA_113520	alpha/beta hydrolase, putative	1.41965
AFLA_114810	cytochrome P450, putative	-1.24716
AFLA_114820	polyketide synthase, putative	1.06436
AFLA_116590	CRAL/TRIO domain protein	-1.30481
AFLA_116600	dimethylallyl tryptophan synthase, putative	-1.42616
AFLA_116670	4-hydroxy-2-oxovalerate aldolase, putative	-1.71137
AFLA_116940	hypothetical protein	-1.11985
AFLA_117520	hypothetical protein	-1.91713
AFLA_117900	thermolabile L-asparaginase, putative	2.02367
AFLA_118030	hypothetical protein	1.4818
AFLA_118190	ganglioside induced differentiation associated protein, putative	1.91131
AFLA_118210	nucleoside-diphosphate-sugar epimerase, putative	-2.72813
AFLA_118370	hypothetical protein	-2.03954
AFLA_118730	glycerol dehydrogenase (GCY1), putative	-1.51403
AFLA_118830	hypothetical protein	-2.21938
AFLA_118890	eukaryotic translation initiation factor eIF-5A-2	-2.10838
AFLA_118980	mitochondrial carrier protein Leu5	-1.64131
AFLA_119130	hypothetical protein	-2.19083
AFLA_119150	hypothetical protein	-1.40433
AFLA_119730	amidase, putative	2.80544
AFLA_119780	neutral protease 2 precursor, putative	-1.64148
AFLA_119830	MFS multidrug transporter, putative	-1.98948
AFLA_119990	aminobutyrate aminotransferase, putative	-3.01419
AFLA_120010	amino acid transporter, putative	-3.84356
AFLA_120180	pheromone processing carboxypeptidase (Sxa2), putative	1.74763
AFLA_120380	tyrosinase, putative	-1.6286
AFLA_120570	short-chain dehydrogenase, putative	-1.8307
AFLA_120920	hypothetical protein	-1.05987
AFLA_120930	glycosyl transferase, putative	-3.22908
AFLA_120940	glycan biosynthesis protein (PigL), putative	-2.9472
AFLA_120950	glycosyl transferase, putative	-3.31756
AFLA_120980	zinc finger protein, putative	-1.09536
AFLA_121000	hypothetical protein	-1.88264
AFLA_121010	integral membrane protein	-1.59022
AFLA_121230	L-amino acid oxidase LaoA	-3.41445
AFLA_121280	hypothetical protein	-1.18719
AFLA_121290	hypothetical protein	-1.07038
AFLA_121300	RTA1 domain protein	-1.43957
AFLA_121450	trihydroxytoluene oxygenase	-1.03324
AFLA_121600	hypothetical protein	-2.46581
AFLA_121640	hypothetical protein	-1.93677
AFLA_122110	bifunctional catalase-peroxidase Cat2	-1.12184
AFLA_122330	allantoate permease, putative	2.47773
AFLA_122470	CobW domain protein	-4.09139
AFLA_122540	hypothetical protein	-1.20321
AFLA_123230	ketoreductase, putative	-1.2198
AFLA_123380	hypothetical protein	-1.17249
AFLA_123710	fatty acid repression mutant protein, putative	2.43692
AFLA_123860	cytochrome P450, putative	-1.11777
AFLA_123880	D-aminopeptidase, putative	-1.80626
AFLA_123910	protein RTA1, putative	1.00026
AFLA_124270	hypothetical protein	-1.71633
AFLA_124300	hypothetical protein	-2.13615
AFLA_124380	hypothetical protein	-1.10621
AFLA_124400	PQ loop repeat protein	-1.75151
AFLA_124540	alcohol dehydrogenase, putative	-3.56033
AFLA_124560	hypothetical protein	-1.40531
AFLA_124790	GNAT family acetyltransferase, putative	-4.64516
AFLA_124820	hypothetical protein	-1.10705
AFLA_124890	hypothetical protein	-3.57278
AFLA_125060	epimerase/dehydratase family protein, putative	-2.8562
AFLA_125070	efflux pump antibiotic resistance protein, putative	-1.30616
AFLA_125650	hypothetical protein	-2.78746
AFLA_125760	squalene-hopene-cyclase, putative	-1.27736
AFLA_125770	LysR family regulatory protein, putative	1.88213
AFLA_126010	hypothetical protein	2.53969
AFLA_126070	hypothetical protein	-2.78146
AFLA_126100	hypothetical protein	-2.15585
AFLA_126280	ATP-binding cassette transporter, putative	-1.01885
AFLA_126450	eukaryotic translation initiation factor 3 subunit, putative	-2.80242
AFLA_126500	hypothetical protein	-3.06459
AFLA_126710	polyketide synthase, putative	-2.10224
AFLA_126750	extracellular glycine-rich protein	-2.82359
AFLA_126900	maltase	-3.15691
AFLA_127030	hypothetical protein	-1.88388
AFLA_127290	zinc metallopeptidase, putative	2.76276
AFLA_128030	hypothetical protein	2.83972
AFLA_128150	C6 transcription factor, putative	-2.32935
AFLA_128270	hypothetical protein	1.93686
AFLA_128680	flavin-binding monooxygenase, putative	-2.96867
AFLA_128690	hypothetical protein	-3.90547
AFLA_129240	short-chain dehydrogenase, putative	-1.09266
AFLA_129250	glucose dehydrogenase, putative	-2.73999
AFLA_129260	hypothetical protein	1.41771
AFLA_129290	hypothetical protein	1.12663
AFLA_129430	vacuolar H+\/Ca2+ exchanger	1.19517
AFLA_129840	hypothetical protein	1.31369
AFLA_131910	hypothetical protein	-2.22677
AFLA_131920	hypothetical protein	-3.0333
AFLA_132030	carbon-nitrogen family hydrolase, putative	-1.21526
AFLA_132230	hypothetical protein	-1.85167
AFLA_132260	hypothetical protein	1.15702
AFLA_132650	polysaccharide deacetylase (NodB), putative	1.86086
AFLA_132750	hypothetical protein	-1.24997
AFLA_132880	hypothetical protein	-1.05664
AFLA_133830	alcohol dehydrogenase, putative	-1.25583
AFLA_134380	hypothetical protein	-1.45846
AFLA_135510	feruloyl esterase, putative	1.42838
AFLA_136340	aminotransferase family protein (LolT), putative	1.30107
AFLA_136350	hypothetical protein	2.55273
AFLA_136720	hypothetical protein	-2.95099
AFLA_137070	allantoate permease, putative	-2.3977
AFLA_137150	hypothetical protein	-2.01951
AFLA_137210	adenosine deaminase, putative	-1.74181
AFLA_137250	MFS transporter, putative	-1.04783
AFLA_137260	hypothetical protein	-3.49635
AFLA_137390	malate/L-lactate dehydrogenase, putative	-1.71781
AFLA_137400	bicyclomycin resistance protein, putative	1.67495
AFLA_137500	short-chain dehydrogenase, putative	1.14109
AFLA_137780	ABC transporter, putative	-2.52951
AFLA_137840	integral membrane protein	-1.78067
AFLA_137850	hypothetical protein	-2.96679
AFLA_137860	hypothetical protein	-2.57798
AFLA_138040	D-alanine--D-alanine ligase, putative	-3.33276
AFLA_138230	6-hydroxy-D-nicotine oxidase, putative	4.76194
AFLA_138240	mannan endo-1,6-alpha-mannosidase DCW1 precursor, putative	7.19967
AFLA_138790	hypothetical protein	-1.52748
AFLA_138800	hypothetical protein	-1.96283
AFLA_138830	hypothetical protein	-1.90623
AFLA_139000	hypothetical protein	-4.44715

## Sheet: Down in Infection hbx1 24 h 
AFLA ID	Description	24 h
AFLA_000330	Ankyrin domain protein	-3.44023
AFLA_000350	NAD dependent epimerase/dehydratase, putative	-3.26813
AFLA_000510	hypothetical protein	-4.87702
AFLA_000680	hypothetical protein	-1.3555
AFLA_000800	hypothetical protein	3.14326
AFLA_000840	efflux pump antibiotic resistance protein, putative	-6.06261
AFLA_000870	hypothetical protein	-1.16241
AFLA_000890	laccase TilA	-3.62327
AFLA_000950	hypothetical protein	-2.23456
AFLA_001020	cytochrome P450 monooxygenase, putative	1.7808
AFLA_001430	hypothetical protein	-1.89825
AFLA_001550	ATP-binding cassette transporter, putative	-1.08497
AFLA_001570	hypothetical protein	-1.03408
AFLA_001600	D-amino acid oxidase, putative	-4.98954
AFLA_001620	luciferase, putative	-1.30279
AFLA_001640	glycosyl hydrolase, putative	-3.43354
AFLA_001780	tyrosinase family protein	-1.00879
AFLA_001800	hypothetical protein	1.53034
AFLA_001950	gluconate 5-dehydrogenase, putative	-2.66742
AFLA_002090	extracellular serine carboxypeptidase, putative	-1.51665
AFLA_002220	proline permease, putative	-2.50965
AFLA_002510	actin monomer binding protein, putative	1.24992
AFLA_002660	hypothetical protein	3.28023
AFLA_003050	RTA1 domain protein, putative	-2.07437
AFLA_003080	hypothetical protein	-2.83258
AFLA_003170	caffeine resistance protein, putative	-4.51266
AFLA_003380	hypothetical protein	-1.01505
AFLA_003470	oxidoreductase family, NAD-binding Rossmann fold protein	1.31118
AFLA_003740	hypothetical protein	-1.49511
AFLA_003950	GNAT family acetyltransferase, putative	1.63508
AFLA_003960	hypothetical protein	-2.54683
AFLA_004140	hypothetical protein	1.89033
AFLA_004190	hypothetical protein	3.44497
AFLA_004260	MFS transporter, putative	-5.10573
AFLA_004650	thiamine biosynthesis protein (Nmt1), putative	3.36442
AFLA_004870	cytochrome P450, putative	-1.86983
AFLA_005130	L-lysine 2,3-aminomutase, putative	-5.01269
AFLA_005440	nonribosomal peptide synthase, putative	-2.14131
AFLA_005460	cytochrome P450, putative	-2.73431
AFLA_005580	hypothetical protein	-1.01977
AFLA_005760	hypothetical protein	3.24496
AFLA_006020	hypothetical protein	1.34774
AFLA_006150	flavin dependent monooxygenase, putative	1.00141
AFLA_006300	nucleoside diphosphate kinase	1.10397
AFLA_006340	hypothetical protein	1.9353
AFLA_006460	hypothetical protein	-1.14541
AFLA_007370	hypothetical protein	-1.48318
AFLA_007450	O-methyltransferase, putative	-6.96238
AFLA_007630	integral membrane protein, Mpv17/PMP22 family, putative	1.78892
AFLA_008120	hypothetical protein	-1.00828
AFLA_008130	MFS transporter, putative	-2.1095
AFLA_008150	5-oxoprolinase, putative	-2.67051
AFLA_008600	hypothetical protein	2.48869
AFLA_008650	short-chain dehydrogenases/reductase, putative	-1.90124
AFLA_008660	hypothetical protein	-2.51296
AFLA_008720	hypothetical protein	-1.15805
AFLA_008740	oxidoreductase, short chain dehydrogenase/reductase family	-2.53931
AFLA_008850	hypothetical protein	1.23036
AFLA_008930	acid phosphatase AphA	-2.01564
AFLA_009020	cytochrome c peroxidase, putative	1.62929
AFLA_009260	hypothetical protein	-5.15043
AFLA_009320	hypothetical protein	4.55155
AFLA_009390	hypothetical protein	-2.12938
AFLA_009410	delta(3,5)-delta(2,4)-dienoyl-CoA isomerase, mitochondrial precursor, putative	-4.33005
AFLA_009420	hypothetical protein	-4.06478
AFLA_009550	xylosidase/arabinosidase, putative	-1.19444
AFLA_009580	C6 transcription factor, putative	-1.02017
AFLA_009860	MFS transporter, putative	2.62355
AFLA_010050	alcohol dehydrogenase, putative	-1.00739
AFLA_010740	lysosomal protective protein precursor, putative	1.57884
AFLA_010800	hypothetical protein	-2.27807
AFLA_010890	sterol desaturase, putative	1.72057
AFLA_010950	cytochrome P450 oxidoreductase, putative	-4.53673
AFLA_011010	norsolorinic acid reductase, putative	1.96064
AFLA_011040	hypothetical protein	3.11065
AFLA_011150	allantoate permease, putative	-1.60066
AFLA_011210	hypothetical protein	-2.34405
AFLA_011220	glucose dehydrogenase, putative	-1.53063
AFLA_011230	glycosyl hydrolase, putative	1.34302
AFLA_011310	vps9-ankyrin repeat-containing protein, putative	-1.9042
AFLA_011800	hypothetical protein	-1.56796
AFLA_012020	carboxypeptidase S1, putative	-3.29581
AFLA_012100	NDT80_PhoG domain protein PcaG	-1.5446
AFLA_012930	conserved hypothetical protein	1.61662
AFLA_012940	sulfatase, putative	1.77896
AFLA_013020	efflux pump antibiotic resistance protein, putative	-2.24393
AFLA_013060	conserved hypothetical protein	-1.51264
AFLA_013210	conserved hypothetical protein	1.81529
AFLA_013590	conserved hypothetical protein	-1.63039
AFLA_013680	phosphatidylglycerol specific phospholipase C, putative	1.53502
AFLA_013730	conserved hypothetical protein	-2.29227
AFLA_014070	monocarboxylate transporter, putative	-2.54216
AFLA_014110	conserved hypothetical protein	-1.17613
AFLA_014130	conserved hypothetical protein	-1.46099
AFLA_014280	conserved hypothetical protein	-3.49813
AFLA_014380	glutamate carboxypeptidase, putative	-4.41954
AFLA_014510	formate/nitrite transporter family protein, putative	-3.93297
AFLA_015340	conserved hypothetical protein	-3.01313
AFLA_015530	conserved hypothetical protein	-1.59313
AFLA_015630	conserved hypothetical protein	-2.95133
AFLA_015780	small oligopeptide transporter, OPT family	1.09041
AFLA_015800	DUF636 domain protein	-2.081
AFLA_015820	hypothetical protein	-2.289
AFLA_015900	carboxyphosphonoenolpyruvate mutase, putative	2.33354
AFLA_015970	1-aminocyclopropane-1-carboxylate oxidase, putative	-1.5413
AFLA_016090	conserved hypothetical protein	-1.28507
AFLA_016290	zinc alcohol dehydrogenase, putative	-1.88607
AFLA_016330	alpha/beta fold family hydrolase, putative	-1.15337
AFLA_016400	glutathione S-transferase, putative	-2.80676
AFLA_016580	conserved hypothetical protein	-1.37211
AFLA_017290	conserved hypothetical protein	-1.0599
AFLA_017390	diphthine synthase, putative	1.19903
AFLA_017750	conserved hypothetical protein	-4.84252
AFLA_017760	phenol 2-monooxygenase, putative	-1.90088
AFLA_018070	MFS transporter, putative	1.74242
AFLA_018110	bZIP transcription factor, putative	-1.11317
AFLA_018230	short-chain dehydrogenase, putative	-2.75554
AFLA_018240	uridine permease Fui1, putative	-2.81313
AFLA_018790	nitrate transporter CrnA	-3.32227
AFLA_018800	nitrite reductase NiiA	-2.38947
AFLA_018810	nitrate reductase NiaD	-2.09899
AFLA_018890	factor for adipocyte differentiation, putative	4.20949
AFLA_019180	CipC-like antibiotic response protein, putative	-1.24429
AFLA_019210	short-chain dehydrogenase, putative	-1.85683
AFLA_019250	mercuric reductase, putative	-1.93058
AFLA_019460	conserved hypothetical protein	-4.25786
AFLA_019510	conserved hypothetical protein	-4.83234
AFLA_020090	conserved hypothetical protein	1.26709
AFLA_020190	hypothetical protein	2.87442
AFLA_020210	sexual development transcription factor NsdD	-1.18101
AFLA_020620	protein kinase domain-containing protein	-2.26145
AFLA_020900	major centromere autoantigen B, putative	-1.40252
AFLA_021180	profilin, putative	3.26577
AFLA_021280	conserved hypothetical protein	1.82118
AFLA_021400	vanillate O-demethylase oxidoreductase, putative	-1.09282
AFLA_021470	conserved hypothetical protein	2.46202
AFLA_021840	diphthamide biosynthesis protein Dph2, putative	1.0465
AFLA_022190	hypothetical protein	1.56919
AFLA_022340	glutamate synthase Glt1, putative	-1.40565
AFLA_022800	conserved hypothetical protein	2.66976
AFLA_023200	acetylcholinesterase, putative	-1.16328
AFLA_023230	general amidase GmdB	1.76918
AFLA_023540	ABC multidrug transporter, putative	-1.12641
AFLA_023720	phosphocarrier protein HPr, putative	-1.81531
AFLA_023730	2-hydroxyacid dehydrogenase, putative	2.123
AFLA_023770	conserved hypothetical protein	-3.95941
AFLA_023780	alcohol dehydrogenase, putative	-5.76792
AFLA_023830	conserved hypothetical protein	1.00474
AFLA_023850	conserved hypothetical protein	1.16966
AFLA_023880	conserved hypothetical protein	-5.63621
AFLA_023890	conserved hypothetical protein	-5.07779
AFLA_023900	hypothetical protein	1.38796
AFLA_024020	amino acid permease, putative	-1.63631
AFLA_024030	2-haloalkanoic acid dehalogenase, putative	-1.36457
AFLA_024040	fungal specific transcription factor, putative	-1.04728
AFLA_024080	cytochrome p450, putative	-3.40827
AFLA_024090	efflux pump antibiotic resistance protein, putative	-3.68565
AFLA_024100	conserved hypothetical protein	-5.50549
AFLA_024120	conserved hypothetical protein	1.71006
AFLA_024160	kinesin light chain, putative	-1.26928
AFLA_024300	amidase, putative	1.19574
AFLA_024540	sensory transduction histidine kinase, putative	3.05524
AFLA_024600	short chain oxidoreductase (CsgA), putative	-1.11207
AFLA_024660	conserved hypothetical protein	-1.42868
AFLA_024720	MFS transporter, putative	1.46759
AFLA_024730	DUF1445 domain protein	2.10744
AFLA_024740	C6 transcription factor, putative	-1.16654
AFLA_024760	conserved hypothetical protein	-1.29063
AFLA_024860	MATH and UCH domain protein, putative	-1.05943
AFLA_024920	DUF221 domain protein, putative	-1.27824
AFLA_026050	conserved hypothetical protein	-3.71399
AFLA_026350	conserved hypothetical protein	1.81277
AFLA_026500	conserved hypothetical protein	1.15697
AFLA_026590	CSL family zinc finger-containing protein	1.23249
AFLA_026980	transporter protein smf2	1.78762
AFLA_027320	hypothetical protein	2.13101
AFLA_027440	aminotransferase, classes I and II, putative	1.03414
AFLA_027810	alkaline serine protease Alp1	-5.89574
AFLA_027820	conserved hypothetical protein	1.38939
AFLA_027980	NUDIX domain, putative	1.06882
AFLA_029150	cyclin (Pcl1), putative	-3.00741
AFLA_029660	urea transporter (Dur3), putative	-3.20958
AFLA_030240	methionyl-tRNA formyltransferase, putative	1.37262
AFLA_030250	C-14 sterol reductase, putative	1.82441
AFLA_030360	zinc binding dehydrogenase, putative	-1.7129
AFLA_030760	hypothetical protein	1.33126
AFLA_030810	conserved hypothetical protein	-2.30434
AFLA_031880	RTA1 domain protein, putative	3.89246
AFLA_032200	coiled-coil domain-containing protein, putative	1.03975
AFLA_032250	nuclear transport factor NTF-2, putative	1.51111
AFLA_032420	conserved hypothetical protein	-2.24454
AFLA_032930	conserved hypothetical protein	-2.04639
AFLA_032940	conserved hypothetical protein	-2.65265
AFLA_033210	MFS allantoate transporter, putative	-1.62978
AFLA_033950	conserved hypothetical protein	4.15383
AFLA_034330	beta-alanine synthase, putative	-1.73854
AFLA_034770	cytochrome P450, putative	-3.20257
AFLA_034780	conserved hypothetical protein	-2.93184
AFLA_034900	hypothetical protein	2.39982
AFLA_034910	ER membrane protein (Pkr1), putative	1.12823
AFLA_034930	hypothetical protein	2.13639
AFLA_035580	alcohol dehydrogenase, putative	-7.98774
AFLA_035680	hydrolase, putative	-4.64474
AFLA_035730	conserved hypothetical protein	1.36611
AFLA_035920	conserved hypothetical protein	-1.91928
AFLA_036390	conserved hypothetical protein	-1.48
AFLA_036560	conserved threonine rich protein	-3.29097
AFLA_036660	lactoylglutathione lyase	1.03646
AFLA_037160	thiazole biosynthesis enzyme Sti35	3.38757
AFLA_037280	hypothetical protein	1.4029
AFLA_038530	elastinolytic metalloproteinase Mep	-2.99712
AFLA_038630	cytochrome P450, putative	1.07323
AFLA_038640	fatty acid synthase alpha subunit, putative	-1.00831
AFLA_038760	mandelate racemase, putative	1.51759
AFLA_038810	hexose carrier protein, putative	-1.03308
AFLA_038830	hypothetical protein	2.22987
AFLA_039010	hypothetical protein	2.20402
AFLA_039060	POT peptide transporter, putative	1.2216
AFLA_039200	cytochrome P450, putative	-4.41506
AFLA_039220	cytochrome P450, putative	-4.77724
AFLA_039230	short-chain dehydrogenase, putative	-3.53969
AFLA_039240	aristolochene synthase, putative	-4.99347
AFLA_039250	hypothetical protein	-4.11722
AFLA_039400	extracellular guanyl-specific ribonuclease RntA	-1.75357
AFLA_039520	hypothetical protein	-3.15712
AFLA_039550	glutamyl-tRNA(gln) amidotransferase subunit A, putative	3.16051
AFLA_040160	molybdopterin cofactor sulfurase, putative	-2.85053
AFLA_040230	low affinity iron transporter, putative	3.75794
AFLA_040290	hypothetical protein	-1.08334
AFLA_040330	chitin binding domain protein Peritrophin-A, putative	-3.90519
AFLA_040400	hypothetical protein	1.53317
AFLA_040960	N-hydroxyarylamine O-acetyltransferase, putative	-1.07343
AFLA_041150	cenp-B, putative	4.7627
AFLA_041180	hypothetical protein	-5.5207
AFLA_041190	hypothetical protein	-2.56117
AFLA_041210	hypothetical protein	-1.06686
AFLA_041310	oxidoreductase, putative	-1.68569
AFLA_041350	sulfonylurea receptor/ ABC transporter, putative	-1.07921
AFLA_041370	isoflavone reductase family protein	-1.91859
AFLA_041390	hypothetical protein	-2.94483
AFLA_041680	MFS drug transporter, putative	-1.76797
AFLA_042010	zinc-dependent alcohol dehydrogenase, putative	1.84969
AFLA_042180	hypothetical protein	-5.17912
AFLA_042220	hypothetical protein	-4.65873
AFLA_042400	AMP-binding enzyme family protein	-1.04285
AFLA_042580	short chain alcohol dehydrogenase, putative	3.76475
AFLA_042600	hypothetical protein	2.53546
AFLA_042750	hypothetical protein	1.74061
AFLA_042770	vitamin H transporter, putative	-1.8118
AFLA_043300	allantoinase Dal1, putative	-1.04777
AFLA_043470	ankyrin repeat-containing protein, putative	-1.22597
AFLA_043510	protein kinase domain-containing protein	-5.53599
AFLA_043900	hypothetical protein	-1.07358
AFLA_043930	MFS phosphate transporter, putative	-2.20812
AFLA_043990	hypothetical protein	2.81146
AFLA_044150	hypothetical protein	-1.59644
AFLA_044680	hypothetical protein	-2.9455
AFLA_045050	hypothetical protein	-1.46964
AFLA_045230	lipopolysaccharide biosynthesis protein rffA, putative	-1.19866
AFLA_045290	extracellular endoglucanase/cellulase, putative	2.30878
AFLA_045370	ankyrin, putative	-2.14116
AFLA_045380	dimeric dihydrodiol dehydrogenase, putative	-1.07605
AFLA_045490	dimethylallyl tryptophan synthase, putative	-2.2216
AFLA_045520	integral membrane protein	-1.64453
AFLA_045830	translation initiation protein Sua5	1.2305
AFLA_045870	hypothetical protein	-5.49243
AFLA_046440	pyridoxine	1.21739
AFLA_046660	mitochondrial carrier protein, putative	-1.86108
AFLA_046670	MFS allantoate transporter, putative	-1.91263
AFLA_047130	hypothetical protein	-1.39177
AFLA_047410	actin-bundling protein Sac6, putative	1.17189
AFLA_048530	sulfur metabolism regulator SkpA, putative	1.07813
AFLA_048680	GABA permease, putative	-1.81255
AFLA_049170	hypothetical protein	-1.74187
AFLA_049520	hypothetical protein	1.44693
AFLA_049830	NCS1 allantoate transporter	-2.85564
AFLA_050120	glutaredoxin Grx1, putative	1.02641
AFLA_050200	hypothetical protein	1.64545
AFLA_050220	hypothetical protein	-2.06304
AFLA_050290	amidohydrolase family protein	-1.45691
AFLA_050300	HMG box protein, putative	2.82048
AFLA_050380	hypothetical protein	-2.60207
AFLA_050830	uridine nucleosidase Urh1, putative	1.24054
AFLA_050860	hypothetical protein	1.09709
AFLA_051390	copper-transporting ATPase, putative	-1.4296
AFLA_051440	fructose-bisphosphate aldolase, putative	1.17787
AFLA_053080	allergen Asp F4-like, putative	2.98624
AFLA_053360	hypothetical protein	1.07818
AFLA_053440	hypothetical protein	-3.8959
AFLA_053480	hypothetical protein	2.15334
AFLA_053530	zeaxanthin epoxidase, putative	-2.84215
AFLA_053540	FAD binding monooxygenase, putative	-3.35087
AFLA_053650	oxidoreductase, short chain dehydrogenase/reductase family	-1.57465
AFLA_053950	hypothetical protein	3.48686
AFLA_053980	DUF636 domain protein	-1.21204
AFLA_054050	ABC multidrug transporter, putative	-3.35068
AFLA_054220	hypothetical protein	1.10097
AFLA_054660	aspartic-type endopeptidase (OpsB), putative	1.81001
AFLA_055020	ankyrin repeat protein	-2.24884
AFLA_055700	ATP-binding cassette transporter, putative	-2.06418
AFLA_056580	hypothetical protein	4.13791
AFLA_056660	hypothetical protein	-1.25133
AFLA_056770	hypothetical protein	1.68028
AFLA_056870	hypothetical protein	1.46459
AFLA_057030	beta-glucosidase	-1.06585
AFLA_057080	hypothetical protein	-2.03245
AFLA_057090	hypothetical protein	-1.47999
AFLA_057110	hypothetical protein	-2.27316
AFLA_057480	hypothetical protein	-4.87174
AFLA_057490	hypothetical protein	1.32854
AFLA_057500	hypothetical protein	-2.81743
AFLA_057510	monocarboxylate transporter, putative	-2.52565
AFLA_057530	S-adenosylmethionine synthetase, putative	-1.72299
AFLA_057580	hypothetical protein	-2.3178
AFLA_057900	glutathione S-transferase GST-6.0, putative	1.02822
AFLA_058030	MFS transporter, putative	-1.63961
AFLA_058050	glyoxylate carboligase, putative	1.64225
AFLA_058090	serine/threonine protein phosphatase PP1, putative	3.77686
AFLA_058500	WD-repeat protein, putative	-1.02403
AFLA_058680	oxidoreductase, 2OG-Fe(II) oxygenase family, putative	-1.9764
AFLA_058800	GAF domain nucleotide-binding protein	1.75366
AFLA_058820	GABA permease, putative	-2.27379
AFLA_058890	oxidoreductase, putative	-6.0257
AFLA_058950	spore wall maturation protein DIT1, putative	2.47364
AFLA_058970	cytochrome P450, putative	2.27428
AFLA_059000	pantothenate transporter, putative	-2.4421
AFLA_059250	class II aldolase/adducin domain protein	-1.54584
AFLA_059520	hypothetical protein	-1.22557
AFLA_059660	aquaporin transporter, putative	2.72479
AFLA_059690	hypothetical protein	-2.23451
AFLA_059840	hypothetical protein	-2.40671
AFLA_059880	2-nitropropane dioxygenase precursor, putative	-4.07572
AFLA_059970	short-chain dehydrogenase, putative	1.00192
AFLA_059980	choline dehydrogenase, putative	1.09393
AFLA_059990	O-methyltransferase, putative	-1.42766
AFLA_060020	PKS-like enzyme, putative	1.10286
AFLA_060060	hypothetical protein	1.35878
AFLA_060100	hypothetical protein	-1.97488
AFLA_060130	NACHT and WD40 domain protein	-2.20962
AFLA_060340	hypothetical protein	-3.41057
AFLA_060780	hydrophobin family protein	-1.47284
AFLA_060800	kinesin family protein	1.68974
AFLA_060880	amino acid permease, putative	-3.18445
AFLA_061060	hypothetical protein	-2.65918
AFLA_061070	hmg-CoA reductase, putative	-6.8629
AFLA_061110	mono- and diacylglycerol lipase precursor, putative	-6.35093
AFLA_061120	polyamine transporter, putative	1.10257
AFLA_061140	cytochrome P450, putative	-1.7216
AFLA_061280	alcohol dehydrogenase, putative	-1.39685
AFLA_062260	3-(3-hydroxy-phenyl)propionate hydroxylase, putative	-2.22279
AFLA_062560	GILT family thiol reductase, putative	1.59394
AFLA_062570	phosphatidylserine decarboxylase, putative	1.93899
AFLA_062860	polyketide synthase, putative	-2.06828
AFLA_063100	quinone oxidoreductase, putative	-1.32846
AFLA_063140	hypothetical protein	1.02491
AFLA_063220	hypothetical protein	-3.99497
AFLA_063250	glutaminyl-peptide cyclotransferase, putative	-8.67669
AFLA_063260	hypothetical protein	-10.1161
AFLA_063270	hypothetical protein	-8.85388
AFLA_063290	hypothetical protein	-8.95198
AFLA_063300	hypothetical protein	-8.85139
AFLA_063330	protein phosphatase 1 regulatory inhibitor subunit 16A, putative	-7.60721
AFLA_063610	hypothetical protein	-1.20502
AFLA_064190	hypothetical protein	-3.48315
AFLA_064280	N-methyltransferase, putative	-3.47765
AFLA_064300	fructosyl amino acid oxidase, putative	-1.03374
AFLA_064320	oligopeptide transporter, putative	-1.52684
AFLA_064330	hypothetical protein	-3.24407
AFLA_064360	ABC multidrug transporter, putative	-1.58728
AFLA_064410	hypothetical protein	-3.71424
AFLA_064440	transport protein, putative	-3.70877
AFLA_064780	hypothetical protein	-1.41623
AFLA_064860	nuclease S1 precursor, putative	-4.90292
AFLA_065150	allantoate permease, putative	-2.43674
AFLA_065300	protease inhibitor (Tfs1), putative	-1.38435
AFLA_065330	malate dehydrogenase, putative	-1.40639
AFLA_065510	hypothetical protein	-3.4925
AFLA_065540	extracellular lipase, putative	-3.79003
AFLA_065620	MFS multidrug transporter, putative	1.27339
AFLA_065730	guanine deaminase, putative	-1.47984
AFLA_066030	hypothetical protein	1.34913
AFLA_066110	bicyclomycin resistance protein, putative	-1.51057
AFLA_066220	allantoate permease, putative	-1.71859
AFLA_066240	hypothetical protein	-3.03408
AFLA_066410	ATP-grasp superfamily protein	2.44999
AFLA_066770	oxidoreductase, FAD-binding, putative	-2.09027
AFLA_066890	cytochrome P450, putative	-3.39862
AFLA_066920	alcohol dehydrogenase, putative	-1.38773
AFLA_066930	cytochrome P450, putative	-4.73872
AFLA_067110	MFS peptide transporter, putative	2.19003
AFLA_067170	hypothetical protein	-1.7871
AFLA_067200	ABC multidrug transporter, putative	-2.50119
AFLA_067320	hypothetical protein	-3.21977
AFLA_067660	pantothenate transporter, putative	-1.64355
AFLA_067910	HLH transcription factor, putative	-2.11647
AFLA_068270	hypothetical protein	1.05037
AFLA_068600	ammonium transporter MepA	-1.49948
AFLA_069820	cellobiohydrolase, putative	-1.59503
AFLA_069890	NACHT and WD40 domain protein	-3.13585
AFLA_069920	GTP-binding protein YchF	1.0001
AFLA_070380	hypothetical protein	-1.59399
AFLA_070610	hypothetical protein	-1.56985
AFLA_071660	xylitol dehydrogenase	1.11632
AFLA_071910	MFS tranporter, putative	-2.56669
AFLA_072670	zinc-iron transporter, putative	3.38874
AFLA_072790	conserved hypothetical protein	-1.37171
AFLA_073050	monooxygenase, putative	-1.73603
AFLA_073140	cytochrome P450, putative	1.95299
AFLA_073380	conserved hypothetical protein	3.93061
AFLA_073390	3-oxoacyl-[acyl-carrier-protein] reductase, putative	1.06688
AFLA_073480	tropomyosin, putative	1.11977
AFLA_073560	amino acid permease (Gap1), putative	-1.10575
AFLA_073650	mandelate racemase/muconate lactonizing enzyme family protein	1.11519
AFLA_073840	Na/K ATPase alpha 1 subunit, putative	2.17781
AFLA_073950	Rho guanyl nucleotide exchange factor, putative	-1.46127
AFLA_074070	siderochrome-iron transporter, putative	-1.01709
AFLA_074380	salicylate hydroxylase, putative	-1.73352
AFLA_074570	efflux pump antibiotic resistance protein, putative	-2.5998
AFLA_074820	conserved hypothetical protein	-5.20442
AFLA_074840	amino acid transporter, putative	-2.6619
AFLA_074850	hypothetical protein	-2.64354
AFLA_074970	helicase, putative	-1.16412
AFLA_075110	hypothetical protein	-3.42981
AFLA_075340	hypothetical protein	-2.98192
AFLA_075690	periplasmic beta-glucosidase precursor, putative	-2.91603
AFLA_075800	conserved hypothetical protein	1.28025
AFLA_075900	conserved hypothetical protein	-1.65483
AFLA_075930	C4-dicarboxylate transporter/malic acid transport protein, putative	1.65581
AFLA_076110	conserved hypothetical protein	-2.42352
AFLA_076320	C6 transcription factor, putative	-1.43781
AFLA_077010	integral membrane protein, putative	1.15638
AFLA_077310	conserved hypothetical protein	1.80284
AFLA_077590	conserved hypothetical protein	-3.31032
AFLA_077770	hypothetical protein	-2.06116
AFLA_077920	glutamate decarboxylase	-4.38081
AFLA_077950	toxin biosynthesis protein (Tri7), putative	-2.06238
AFLA_078040	(S)-2-haloacid dehalogenase IVA, putative	-4.72915
AFLA_078050	cytochrome P450 monooxygenase, putative	1.3543
AFLA_078080	conserved hypothetical protein	1.63657
AFLA_078110	C-14 sterol reductase, putative	-1.53836
AFLA_078350	conserved hypothetical protein	2.49158
AFLA_078430	aldehyde dehydrogenase family protein	-1.5007
AFLA_078440	integral membrane protein	2.30727
AFLA_078480	cysteine protease, putative	-1.98357
AFLA_078570	conserved hypothetical protein	1.74942
AFLA_078690	RNA interference and gene silencing protein (Qde2), putative	-1.72168
AFLA_078840	MFS transporter, putative	-1.44901
AFLA_079330	amino acid transporter, putative	1.38271
AFLA_079340	dienelactone hydrolase, putative	1.43288
AFLA_079380	NRPS-like enzyme, putative	2.80317
AFLA_079600	acyl-CoA:6-aminopenicillanic-acid-acyltransferase, putative	-1.82129
AFLA_079850	phosphatidyl synthase	-1.09879
AFLA_079990	hypothetical protein	1.39046
AFLA_080560	conserved hypothetical protein	-1.48514
AFLA_080600	carboxylesterase-mitochondrial 37S ribosomal protein YmS2	1.47924
AFLA_081770	conserved hypothetical protein	-5.49451
AFLA_081820	glycosyl hydrolase, putative	-3.44693
AFLA_081930	conserved hypothetical protein	1.65243
AFLA_081980	ferulic acid esterase (FaeA), putative	-2.02688
AFLA_081990	conserved hypothetical protein	2.89707
AFLA_082460	conserved hypothetical protein	-8.15305
AFLA_082850	C2H2 type conidiation transcription factor BrlA	-2.17902
AFLA_082940	conserved hypothetical protein	1.04404
AFLA_082970	monocarboxylate permease homolog, mch4, putative	-1.25203
AFLA_083120	thioredoxin, putative	-1.16577
AFLA_084090	C6 transcription factor, putative	-1.17852
AFLA_084810	conserved hypothetical protein	1.10123
AFLA_084860	conserved hypothetical protein	-2.71578
AFLA_085010	conserved hypothetical protein	3.35887
AFLA_085200	camp independent regulatory protein	-1.08546
AFLA_085720	conserved hypothetical protein	-2.13288
AFLA_085820	conserved hypothetical protein	-2.80954
AFLA_085960	cell surface protein, putative	-1.15583
AFLA_086020	caffeine resistance protein, putative	-3.49717
AFLA_086130	NUDIX domain, putative	-1.45551
AFLA_086650	conserved hypothetical protein	-1.41834
AFLA_087020	hypothetical protein	1.55223
AFLA_087190	hypothetical protein	-1.00011
AFLA_087320	GABA permease GabA	-1.93358
AFLA_087390	conserved hypothetical protein	2.20378
AFLA_087620	NmrA family transcriptional regulator, putative	-2.39898
AFLA_088100	purine-cytosine permease, putative	1.70916
AFLA_089450	GABA permease, putative	-2.29094
AFLA_089500	plasma membrane calcium-transporting ATPase, putative	-1.48716
AFLA_089510	vacuolar calcium ion transporter, putative	-1.03926
AFLA_089540	hypothetical protein	1.31053
AFLA_089590	hypothetical protein	1.41849
AFLA_089740	short-chain dehydrogenase, putative	-2.58362
AFLA_089900	cofilin, actophorin, putative	-1.6214
AFLA_090060	aspergillopepsin, putative	-1.79949
AFLA_090220	integral membrane protein	-1.93113
AFLA_090600	hypothetical protein	-1.08022
AFLA_090620	hypothetical protein	-3.5426
AFLA_090670	hypothetical protein	1.87428
AFLA_090750	AMID-like mitochondrial oxidoreductase, putative	1.07253
AFLA_091710	C6 finger domain protein, putative	-1.11812
AFLA_091760	C-3 sterol dehydrogenase/C-4 decarboxylase family protein	1.75528
AFLA_091780	hypothetical protein	-1.72766
AFLA_092190	hypothetical protein	2.15419
AFLA_092200	hypothetical protein	2.39298
AFLA_092300	hypothetical protein	1.18005
AFLA_093000	MFS efflux transporter, putative	-1.08933
AFLA_093040	C6 transcription factor (NirA), putative	-1.05781
AFLA_093530	oxidoreductase, 2OG-Fe(II) oxygenase family	-1.93041
AFLA_094270	hypothetical protein	-5.11169
AFLA_094280	agmatinase, putative	-4.8286
AFLA_094290	MATE efflux family protein subfamily, putative	-4.38064
AFLA_094300	hypothetical protein	-4.23272
AFLA_094320	ankyrin repeat domain, putative	1.70278
AFLA_094450	aspartic endopeptidase Pep1/aspergillopepsin F	-1.55837
AFLA_094580	hypothetical protein	-1.42954
AFLA_094620	hypothetical protein	-1.52793
AFLA_095070	MFS multidrug transporter, putative	-2.86526
AFLA_095120	efflux pump antibiotic resistance protein, putative	-3.06408
AFLA_095310	hypothetical protein	3.13809
AFLA_095430	hypothetical protein	-2.38956
AFLA_095530	neuroligin, putative	2.18419
AFLA_096010	hypothetical protein	2.55942
AFLA_096030	hypothetical protein	-2.89498
AFLA_096040	hypothetical protein	-6.94521
AFLA_096050	protein RDR1, putative	-2.78222
AFLA_096060	hypothetical protein	-10.3314
AFLA_096380	FAD dependent oxidoreductase, putative	-1.67893
AFLA_096440	acyl transferase, putative	-1.11758
AFLA_096590	monoxygenase, putative	-2.81799
AFLA_097300	hypothetical protein	-1.14235
AFLA_097320	hypothetical protein	-2.41096
AFLA_097360	MFS peptide transporter, putative	2.70463
AFLA_097550	hypothetical protein	-2.02833
AFLA_097610	gluconolactonase precursor, putative	3.86706
AFLA_097650	hypothetical protein	3.54365
AFLA_097770	hypothetical protein	1.06509
AFLA_097940	AhpC/TSA family thioredoxin peroxidase, putative	1.70687
AFLA_098210	hypothetical protein	-2.11952
AFLA_098380	conidial hydrophobin RodA/RolA	-3.06333
AFLA_098570	sterol isomerase, putative	-2.52707
AFLA_098600	hypothetical protein	3.3998
AFLA_098700	carbonyl reductase, putative	-1.92429
AFLA_098780	hypothetical protein	1.74777
AFLA_098840	L-amino acid oxidase, putative	2.35606
AFLA_098910	hypothetical protein	1.6384
AFLA_099050	hypothetical protein	-1.40022
AFLA_099110	hypothetical protein	1.81005
AFLA_099340	hypothetical protein	-1.22851
AFLA_099360	hypothetical protein	-1.18842
AFLA_099710	oxidoreductase, short-chain dehydrogenase/reductase family	1.88529
AFLA_099870	alpha/beta hydrolase, putative	1.45991
AFLA_099930	hypothetical protein	-2.57698
AFLA_100540	oxidoreductase, putative	-1.20537
AFLA_100580	hypothetical protein	-1.346
AFLA_101130	C2H2 zinc finger domain protein, putative	-1.2029
AFLA_101550	thioredoxin reductase, putative	-1.32337
AFLA_101620	hypothetical protein	-1.35476
AFLA_101720	cytochrome P450, putative	-3.56802
AFLA_101740	glycerophosphoinositol/ glycerophosphocholine transporter, putative	1.02251
AFLA_101750	molybdopterin synthase small subunit CnxG	1.71362
AFLA_101950	hypothetical protein	-1.76478
AFLA_102000	hypothetical protein	-3.28326
AFLA_102250	PKS-like enzyme, putative	-1.53632
AFLA_102260	hypothetical protein	-1.12033
AFLA_102380	lipase, putative	-1.77394
AFLA_102390	hypothetical protein	-1.62385
AFLA_102490	hypothetical protein	4.38842
AFLA_102640	exo-beta-1,3-glucanase, putative	-2.14636
AFLA_103010	dsDNA-binding protein PDCD5, putative	1.11483
AFLA_104350	dynamin, putative	1.40344
AFLA_104420	hypothetical protein	-2.03835
AFLA_104510	methyltransferase family protein	-1.19208
AFLA_104700	monoxygenase, putative	1.48541
AFLA_104740	2-hydroxyhepta-2,4-diene-1,7-dioate isomerase, putative	-1.14704
AFLA_104750	pantothenate transporter, putative	-1.28944
AFLA_104800	hypothetical protein	-1.32767
AFLA_105060	NAD dependent epimerase/dehydratase, putative	-3.35706
AFLA_105600	hypothetical protein	-1.25578
AFLA_106230	carboxylesterase, putative	-1.3311
AFLA_106900	efflux pump antibiotic resistance protein, putative	-6.005
AFLA_106910	hypothetical protein	-5.15269
AFLA_107140	hypothetical protein	1.66935
AFLA_107300	3-hydroxyanthranilate 3,4-dioxygenase Bna1, putative	1.14863
AFLA_107410	glucose-methanol-choline (gmc) oxidoreductase, putative	1.28736
AFLA_107560	oxidoreductase, 2OG-Fe(II) oxygenase family, putative	1.18057
AFLA_107960	hypothetical protein	1.79997
AFLA_107990	lysosomal protective protein precursor, putative	2.30813
AFLA_108000	hypothetical protein	2.8616
AFLA_108040	hypothetical protein	-8.93446
AFLA_108060	short-chain dehydrogenase, putative	1.48626
AFLA_108210	hypothetical protein	2.63088
AFLA_108240	amidohydrolase, putative	-1.14679
AFLA_108260	ammonium transporter, putative	-4.03186
AFLA_108280	hypothetical protein	-3.98313
AFLA_108310	hypothetical protein	2.97626
AFLA_108540	NADH oxidase, putative	-1.86373
AFLA_108710	quinone oxidoreductase, putative	1.37594
AFLA_109150	C2H2 finger domain protein (Ezf), putative	1.29982
AFLA_109220	C6 transcription factor, putative	-3.60822
AFLA_109230	2-hydroxyacid dehydrogenase, putative	-2.06401
AFLA_109520	zinc-iron transporter, putative	3.00279
AFLA_109800	dynamin GTPase, putative	-2.27402
AFLA_110390	hypothetical protein	-1.30387
AFLA_110410	phosphate transporter	-1.89666
AFLA_110480	molybdenum cofactor sulfurase protein (HxB), putative	-1.12627
AFLA_110690	cytochrome c peroxidase Ccp1, putative	-1.0188
AFLA_111100	mitochondrial peroxiredoxin Prx1, putative	1.50232
AFLA_112480	3-oxo-5-alpha-steroid 4-dehydrogenase family protein	1.07791
AFLA_113080	coenzyme A synthetase, putative	1.43737
AFLA_113340	hypothetical protein	2.78125
AFLA_113380	hypothetical protein	-5.63849
AFLA_113590	hypothetical protein	1.10896
AFLA_113640	hypothetical protein	-4.83822
AFLA_114400	cation efflux protein/ zinc transporter, putative	1.15096
AFLA_114810	cytochrome P450, putative	-1.20647
AFLA_114820	polyketide synthase, putative	1.98964
AFLA_116130	hypothetical protein	-4.74834
AFLA_116150	integral membrane protein	2.37325
AFLA_116460	hypothetical protein	-1.47493
AFLA_116590	CRAL/TRIO domain protein	-1.35185
AFLA_116830	hypothetical protein	-1.58248
AFLA_116940	hypothetical protein	1.65814
AFLA_117900	thermolabile L-asparaginase, putative	1.60929
AFLA_118030	hypothetical protein	1.33905
AFLA_118190	ganglioside induced differentiation associated protein, putative	-2.80876
AFLA_118210	nucleoside-diphosphate-sugar epimerase, putative	-2.0413
AFLA_118320	hypothetical protein	-3.59233
AFLA_118620	oxidoreductase CipA-like, putative	-1.48691
AFLA_118760	hypothetical protein	-1.55122
AFLA_118830	hypothetical protein	-2.12081
AFLA_118870	translation initiation inhibitor, putative	-1.53247
AFLA_118890	eukaryotic translation initiation factor eIF-5A-2	-1.21425
AFLA_118960	polyketide synthase, putative	-1.97764
AFLA_118980	mitochondrial carrier protein Leu5	-1.71103
AFLA_119130	hypothetical protein	-2.37271
AFLA_119150	hypothetical protein	-7.11342
AFLA_119560	pyridoxamine phosphate oxidase, putative	1.08063
AFLA_119640	cofilin	1.01604
AFLA_119730	amidase, putative	3.42934
AFLA_119780	neutral protease 2 precursor, putative	-1.14747
AFLA_119800	hypothetical protein	2.41274
AFLA_119830	MFS multidrug transporter, putative	-1.71997
AFLA_119960	oxidoreductase, putative	1.00304
AFLA_119990	aminobutyrate aminotransferase, putative	-4.91989
AFLA_120010	amino acid transporter, putative	-2.32021
AFLA_120180	pheromone processing carboxypeptidase (Sxa2), putative	2.18651
AFLA_121250	hypothetical protein	1.8763
AFLA_121370	1,3-beta-glucanosyltransferase, putative	1.01042
AFLA_121450	trihydroxytoluene oxygenase	-1.66575
AFLA_121550	hypothetical protein	-1.31945
AFLA_121610	cytochrome P450, putative	-2.48401
AFLA_121820	24-dehydrocholesterol reductase precursor, putative	1.17893
AFLA_122110	bifunctional catalase-peroxidase Cat2	-6.14954
AFLA_122140	hypothetical protein	1.04777
AFLA_122200	hypothetical protein	-4.11816
AFLA_122310	esterase, putative	-1.34475
AFLA_122470	CobW domain protein	4.20274
AFLA_122540	hypothetical protein	-1.2295
AFLA_123140	uracil permease, putative	-1.7623
AFLA_123230	ketoreductase, putative	-2.0019
AFLA_123280	hypothetical protein	-1.21963
AFLA_123330	hypothetical protein	1.36754
AFLA_123430	hypothetical protein	-1.04308
AFLA_123500	C6 transcription factor, putative	-3.42303
AFLA_123710	fatty acid repression mutant protein, putative	2.35064
AFLA_123790	srpk, putative	-1.11123
AFLA_123910	protein RTA1, putative	3.8983
AFLA_124270	hypothetical protein	-2.00485
AFLA_124300	hypothetical protein	-4.50452
AFLA_124320	hypothetical protein	-1.64454
AFLA_124330	short chain oxidoreductase/dehydrogenase, putative	2.3981
AFLA_124380	hypothetical protein	-1.7277
AFLA_124400	PQ loop repeat protein	-1.47691
AFLA_124790	GNAT family acetyltransferase, putative	2.09896
AFLA_124800	hypothetical protein	2.03189
AFLA_124890	hypothetical protein	1.52175
AFLA_125040	hypothetical protein	-6.01049
AFLA_125060	epimerase/dehydratase family protein, putative	1.01958
AFLA_125070	efflux pump antibiotic resistance protein, putative	-1.28364
AFLA_125750	cytochrome P450 oxidoreductase/alkane hydroxylase, putative	-5.63957
AFLA_125760	squalene-hopene-cyclase, putative	-7.16005
AFLA_125770	LysR family regulatory protein, putative	-10.9889
AFLA_125780	ATP-binding cassette transporter, putative	-4.20962
AFLA_125920	hypothetical protein	-4.19636
AFLA_126280	ATP-binding cassette transporter, putative	-1.23359
AFLA_126450	eukaryotic translation initiation factor 3 subunit, putative	-3.95733
AFLA_126670	hypothetical protein	-1.40064
AFLA_126710	polyketide synthase, putative	-2.33953
AFLA_126750	extracellular glycine-rich protein	1.12444
AFLA_126900	maltase	-1.96707
AFLA_127000	hypothetical protein	1.95724
AFLA_127290	zinc metallopeptidase, putative	1.66124
AFLA_127410	hypothetical protein	2.11254
AFLA_128030	hypothetical protein	-1.59509
AFLA_128550	proline utilization protein PrnX, putative	2.04517
AFLA_128680	flavin-binding monooxygenase, putative	-1.03725
AFLA_128690	hypothetical protein	-2.72236
AFLA_129240	short-chain dehydrogenase, putative	-1.39563
AFLA_129250	glucose dehydrogenase, putative	-1.54702
AFLA_129270	hypothetical protein	-1.53311
AFLA_129280	hypothetical protein	-3.23365
AFLA_129450	MFS transporter, putative	1.01117
AFLA_129780	hypothetical protein	2.95737
AFLA_129790	hypothetical protein	-1.12683
AFLA_129840	hypothetical protein	2.15527
AFLA_131640	HLH transcription factor (Hpa3), putative	-1.5551
AFLA_131740	aromatic ring-opening dioxygenase LigB subunit, putative	-1.77758
AFLA_131860	hypothetical protein	1.03541
AFLA_131920	hypothetical protein	-1.26229
AFLA_131990	MFS monocarboxylate transporter, putative	-1.16451
AFLA_132000	DUF829 domain protein (PaxU), putative	-1.22588
AFLA_132100	ammonium transporter, putative	-2.75377
AFLA_132230	hypothetical protein	-3.80365
AFLA_132260	hypothetical protein	1.33678
AFLA_132890	actin cytoskeleton organization protein (Cro1), putative	-2.88937
AFLA_133830	alcohol dehydrogenase, putative	-1.65901
AFLA_134270	efflux pump antibiotic resistance protein, putative	-1.05024
AFLA_134380	hypothetical protein	-1.27242
AFLA_134450	galactose-1-phosphate uridylyltransferase	1.7147
AFLA_135310	hypothetical protein	-1.68385
AFLA_135510	feruloyl esterase, putative	2.78939
AFLA_135600	hypothetical protein	1.10791
AFLA_136090	MFS transporter, putative	-1.30893
AFLA_136190	hypothetical protein	-2.14322
AFLA_136350	hypothetical protein	1.09655
AFLA_136370	alcohol dehydrogenase, putative	-1.70385
AFLA_136460	DRAP deaminase, putative	1.02769
AFLA_136720	hypothetical protein	-2.05475
AFLA_137070	allantoate permease, putative	-2.84749
AFLA_137210	adenosine deaminase, putative	-1.48493
AFLA_137390	malate/L-lactate dehydrogenase, putative	-1.34502
AFLA_137400	bicyclomycin resistance protein, putative	2.25464
AFLA_137460	glycosyl transferase, putative	-3.13577
AFLA_137500	short-chain dehydrogenase, putative	-1.55718
AFLA_137770	UMTA methyltransferase family protein	3.62845
AFLA_137840	integral membrane protein	-1.98165
AFLA_137850	hypothetical protein	-3.15137
AFLA_137860	hypothetical protein	-2.14758
AFLA_137870	polyketide synthase, putative	-2.54939
AFLA_138040	D-alanine--D-alanine ligase, putative	-1.44699
AFLA_138060	c-24(28) sterol reductase	-1.40314
AFLA_138240	mannan endo-1,6-alpha-mannosidase DCW1 precursor, putative	6.26346
AFLA_138350	hypothetical protein	-4.39646
AFLA_138400	NAD dependent epimerase/dehydratase, putative	3.12194
AFLA_138790	hypothetical protein	-7.18891
AFLA_138860	hypothetical protein	2.36158
AFLA_139000	hypothetical protein	-10.1855
AFLA_139040	hypothetical protein	-1.17454

## Sheet: hbx1_virulence_down 48h
AFLA ID	Description	48 h
AFLA_000330	Ankyrin domain protein	-1.4344
AFLA_000350	NAD dependent epimerase/dehydratase, putative	-1.4344
AFLA_000510	hypothetical protein	-1.74421
AFLA_000640	polyamine oxidase, putative	2.98576
AFLA_000660	benzoate 4-monooxygenase cytochrome P450, putative	2.28705
AFLA_000680	hypothetical protein	1.73389
AFLA_000820	MFS sugar transporter, putative	1.14969
AFLA_000840	efflux pump antibiotic resistance protein, putative	1.35617
AFLA_000890	laccase TilA	-2.85773
AFLA_001020	cytochrome P450 monooxygenase, putative	1.9629
AFLA_001550	ATP-binding cassette transporter, putative	4.61036
AFLA_001560	short-chain dehydrogenase, putative	-1.05738
AFLA_001570	hypothetical protein	4.37318
AFLA_001620	luciferase, putative	-1.25629
AFLA_001640	glycosyl hydrolase, putative	7.10413
AFLA_001660	hypothetical protein	-6.7684
AFLA_001800	hypothetical protein	-11.6382
AFLA_001930	luciferase, putative	1.1177
AFLA_001950	gluconate 5-dehydrogenase, putative	-1.62416
AFLA_001980	glutamate cysteine ligase, putative	-2.7996
AFLA_002020	spherulin 4-like cell surface protein, putative	-3.42314
AFLA_002090	extracellular serine carboxypeptidase, putative	-7.91786
AFLA_002220	proline permease, putative	-1.2605
AFLA_002510	actin monomer binding protein, putative	-1.04282
AFLA_003050	RTA1 domain protein, putative	1.13635
AFLA_003170	caffeine resistance protein, putative	2.27189
AFLA_003380	hypothetical protein	-2.14518
AFLA_003470	oxidoreductase family, NAD-binding Rossmann fold protein	2.28143
AFLA_003780	choline/ethanolamine kinase, putative	-1.34448
AFLA_003840	hypothetical protein	1.62213
AFLA_003950	GNAT family acetyltransferase, putative	3.14569
AFLA_003960	hypothetical protein	1.46626
AFLA_004120	hypothetical protein	-5.646
AFLA_004140	hypothetical protein	-3.63642
AFLA_004190	hypothetical protein	-4.24714
AFLA_004260	MFS transporter, putative	2.88158
AFLA_004460	fatty acid desaturase family protein	-4.22874
AFLA_004650	thiamine biosynthesis protein (Nmt1), putative	2.87819
AFLA_005130	L-lysine 2,3-aminomutase, putative	-3.18465
AFLA_005430	hypothetical protein	-1.83925
AFLA_005460	cytochrome P450, putative	-4.52117
AFLA_005580	hypothetical protein	-2.87495
AFLA_005760	hypothetical protein	-1.73448
AFLA_006020	hypothetical protein	4.02744
AFLA_006150	flavin dependent monooxygenase, putative	-1.62054
AFLA_007370	hypothetical protein	-1.00308
AFLA_007450	O-methyltransferase, putative	1.73389
AFLA_007560	F5/8 type C domain protein	-2.06073
AFLA_007630	integral membrane protein, Mpv17/PMP22 family, putative	-6.98297
AFLA_008120	hypothetical protein	-1.2189
AFLA_008150	5-oxoprolinase, putative	1.67952
AFLA_008220	hypothetical protein	2.2775
AFLA_008570	hypothetical protein	1.08597
AFLA_008600	hypothetical protein	1.05946
AFLA_008650	short-chain dehydrogenases/reductase, putative	-1.70854
AFLA_008660	hypothetical protein	-1.23747
AFLA_009320	hypothetical protein	-4.07775
AFLA_009390	hypothetical protein	9.33204
AFLA_009410	delta(3,5)-delta(2,4)-dienoyl-CoA isomerase, mitochondrial precursor, putative	2.76613
AFLA_009420	hypothetical protein	1.94372
AFLA_009500	hypothetical protein	-1.80172
AFLA_009550	xylosidase/arabinosidase, putative	1.52762
AFLA_009580	C6 transcription factor, putative	1.69243
AFLA_009820	feruloyl esterase B precursor, putative	1.60896
AFLA_009860	MFS transporter, putative	3.70955
AFLA_009930	diacylglycerol pyrophosphate phosphatase, putative	2.08504
AFLA_010010	nonribosomal peptide synthase, putative	2.35789
AFLA_010050	alcohol dehydrogenase, putative	2.9032
AFLA_010120	extracellular dioxygenase, putative	1.86567
AFLA_010740	lysosomal protective protein precursor, putative	-1.05417
AFLA_010800	hypothetical protein	1.88105
AFLA_010890	sterol desaturase, putative	-1.36457
AFLA_010950	cytochrome P450 oxidoreductase, putative	1.16191
AFLA_011010	norsolorinic acid reductase, putative	-3.11429
AFLA_011040	hypothetical protein	3.52909
AFLA_011150	allantoate permease, putative	4.67222
AFLA_011210	hypothetical protein	-4.16178
AFLA_011220	glucose dehydrogenase, putative	-3.60212
AFLA_011230	glycosyl hydrolase, putative	-2.53824
AFLA_012020	carboxypeptidase S1, putative	-1.62467
AFLA_012940	sulfatase, putative	2.6516
AFLA_013020	efflux pump antibiotic resistance protein, putative	1.80644
AFLA_013300	oxidoreductase, 2-nitropropane dioxygenase family, putative	-5.14593
AFLA_013550	hypothetical protein	4.17513
AFLA_013590	conserved hypothetical protein	-1.6014
AFLA_013730	conserved hypothetical protein	-1.47558
AFLA_014020	conserved hypothetical protein	-1.08841
AFLA_014070	monocarboxylate transporter, putative	1.05607
AFLA_014110	conserved hypothetical protein	-3.78889
AFLA_014130	conserved hypothetical protein	-1.09255
AFLA_014380	glutamate carboxypeptidase, putative	-2.00408
AFLA_014390	efflux pump antibiotic resistance protein, putative	-10.8044
AFLA_014510	formate/nitrite transporter family protein, putative	-2.87903
AFLA_015340	conserved hypothetical protein	-1.17724
AFLA_015530	conserved hypothetical protein	-1.95009
AFLA_015550	MFS sugar transporter, putative	1.30156
AFLA_015610	conserved hypothetical protein	1.4839
AFLA_015790	C6 transcription factor (Leu3), putative	2.18027
AFLA_015800	DUF636 domain protein	2.19377
AFLA_015820	hypothetical protein	-1.97635
AFLA_015890	C2H2 finger domain protein, putative	-1.85308
AFLA_015900	carboxyphosphonoenolpyruvate mutase, putative	1.45004
AFLA_015970	1-aminocyclopropane-1-carboxylate oxidase, putative	5.498
AFLA_016290	zinc alcohol dehydrogenase, putative	2.21206
AFLA_016360	PAF acetylhydrolase family protein	-4.24617
AFLA_016400	glutathione S-transferase, putative	3.23813
AFLA_016550	conserved hypothetical protein	1.58099
AFLA_017290	conserved hypothetical protein	1.69747
AFLA_017390	diphthine synthase, putative	-1.99748
AFLA_017750	conserved hypothetical protein	-2.72406
AFLA_017760	phenol 2-monooxygenase, putative	-6.72357
AFLA_018070	MFS transporter, putative	-3.31747
AFLA_018110	bZIP transcription factor, putative	1.37837
AFLA_018230	short-chain dehydrogenase, putative	-1.34436
AFLA_018240	uridine permease Fui1, putative	3.30643
AFLA_018800	nitrite reductase NiiA	1.37213
AFLA_019120	conserved hypothetical protein	2.4449
AFLA_019180	CipC-like antibiotic response protein, putative	-1.73156
AFLA_019190	aspartyl protease, putative	-3.07977
AFLA_019210	short-chain dehydrogenase, putative	-4.02702
AFLA_019260	short-chain dehydrogenase, putative	-1.05555
AFLA_019510	conserved hypothetical protein	-4.15054
AFLA_019540	glucose dehydrogenase, putative	-5.9688
AFLA_019950	conserved hypothetical protein	-3.04926
AFLA_020090	conserved hypothetical protein	1.29857
AFLA_020190	hypothetical protein	-3.33677
AFLA_020620	protein kinase domain-containing protein	-1.27486
AFLA_020950	DNA repair protein Mus81, putative	-1.49218
AFLA_021180	profilin, putative	1.81606
AFLA_021400	vanillate O-demethylase oxidoreductase, putative	1.26101
AFLA_021840	diphthamide biosynthesis protein Dph2, putative	1.26161
AFLA_022230	DSBA-like thioredoxin domain protein	1.12714
AFLA_022340	glutamate synthase Glt1, putative	-1.15815
AFLA_022680	metalloprotease MEP1	-1.58011
AFLA_022800	conserved hypothetical protein	-1.12381
AFLA_022880	oligopeptide transporter, putative	3.08475
AFLA_023170	MFS transporter, putative	2.71052
AFLA_023200	acetylcholinesterase, putative	1.02779
AFLA_023220	conserved hypothetical protein	2.53123
AFLA_023230	general amidase GmdB	2.08251
AFLA_023440	acyltransferase, putative	1.66583
AFLA_023610	conserved hypothetical protein	1.60325
AFLA_023720	phosphocarrier protein HPr, putative	-5.05149
AFLA_023780	alcohol dehydrogenase, putative	-1.74425
AFLA_023830	conserved hypothetical protein	-2.22924
AFLA_023890	conserved hypothetical protein	-2.81829
AFLA_023900	hypothetical protein	-2.77621
AFLA_024000	FAD dependent oxidoreductase superfamily	-1.19192
AFLA_024020	amino acid permease, putative	1.71324
AFLA_024030	2-haloalkanoic acid dehalogenase, putative	1.85761
AFLA_024090	efflux pump antibiotic resistance protein, putative	-2.14449
AFLA_024100	conserved hypothetical protein	-2.27833
AFLA_024120	conserved hypothetical protein	-3.49558
AFLA_024160	kinesin light chain, putative	3.70385
AFLA_024300	amidase, putative	-1.06442
AFLA_024380	fatty-acid amide hydrolase, putative	3.05865
AFLA_024460	conserved hypothetical protein	1.24319
AFLA_024490	IMP-specific 5'-nucleotidase (Isn1), putative	1.5315
AFLA_024540	sensory transduction histidine kinase, putative	-2.80571
AFLA_024570	hypothetical protein	3.16812
AFLA_024700	short-chain alcohol dehydrogenase, putative	1.52324
AFLA_024720	MFS transporter, putative	2.2359
AFLA_024730	DUF1445 domain protein	2.28166
AFLA_024860	MATH and UCH domain protein, putative	-4.22409
AFLA_025380	conserved hypothetical protein	2.15412
AFLA_025390	high affinity zinc ion transporter, putative	-3.00727
AFLA_025510	GPI anchored protein, putative	1.51221
AFLA_025890	inositol-pentakisphosphate 2-kinase, putative	-1.33895
AFLA_026020	calmodulin	-1.10788
AFLA_026050	conserved hypothetical protein	-1.15469
AFLA_026350	conserved hypothetical protein	-4.28971
AFLA_026500	conserved hypothetical protein	1.98206
AFLA_026590	CSL family zinc finger-containing protein	-1.28691
AFLA_026850	HMG box protein, putative	-1.2882
AFLA_026980	transporter protein smf2	3.69022
AFLA_027820	conserved hypothetical protein	-6.84424
AFLA_028260	exo-beta-1,3-glucanase (Exg1), putative	1.62996
AFLA_029150	cyclin (Pcl1), putative	-4.92585
AFLA_029660	urea transporter (Dur3), putative	-1.18941
AFLA_030240	methionyl-tRNA formyltransferase, putative	2.46848
AFLA_030250	C-14 sterol reductase, putative	2.02129
AFLA_030810	conserved hypothetical protein	2.44231
AFLA_030880	conserved hypothetical protein	-1.2956
AFLA_031880	RTA1 domain protein, putative	-1.54356
AFLA_032200	coiled-coil domain-containing protein, putative	5.74256
AFLA_032920	conserved hypothetical protein	1.13658
AFLA_032930	conserved hypothetical protein	-3.3693
AFLA_032940	conserved hypothetical protein	-3.09069
AFLA_033220	amidase family protein	2.33475
AFLA_033410	conserved hypothetical protein	2.6962
AFLA_033480	C6 transcription factor, putative	3.32821
AFLA_033670	lipid transfer protein, putative	1.70441
AFLA_033750	H+/nucleoside cotransporter	-1.65812
AFLA_033860	hypothetical protein	2.23114
AFLA_033950	conserved hypothetical protein	-2.12613
AFLA_034140	monocarboxylate permease, putative	-7.5529
AFLA_034240	dienelactone hydrolase family protein	-2.06232
AFLA_034330	beta-alanine synthase, putative	-1.47478
AFLA_034380	catalase, putative	1.64239
AFLA_034410	aspartate aminotransferase, putative	1.35366
AFLA_034760	conserved hypothetical protein	-1.15389
AFLA_034770	cytochrome P450, putative	3.66747
AFLA_034900	hypothetical protein	1.12204
AFLA_035520	nucleoside transporter, putative	1.53608
AFLA_035580	alcohol dehydrogenase, putative	2.80665
AFLA_035680	hydrolase, putative	-3.13481
AFLA_036000	salicylate hydroxylase, putative	-1.20566
AFLA_036390	conserved hypothetical protein	-4.15271
AFLA_036400	conserved hypothetical protein	1.29176
AFLA_036560	conserved threonine rich protein	-5.63311
AFLA_036570	hypothetical protein	-3.38681
AFLA_036940	cytochrome P450 monooxygenase, putative	1.42913
AFLA_036950	hypothetical protein	3.29555
AFLA_037120	conserved hypothetical protein	2.16785
AFLA_037160	thiazole biosynthesis enzyme Sti35	-4.9017
AFLA_037180	MFS transporter, putative	2.79643
AFLA_037280	hypothetical protein	1.02229
AFLA_037710	phosphomannomutase (Sec53), putative	2.41131
AFLA_038230	hypothetical protein	-1.32451
AFLA_038530	elastinolytic metalloproteinase Mep	1.62571
AFLA_038570	malonyl CoA-acyl carrier protein transacylase, putative	-6.61558
AFLA_038580	RTA1 domain protein	2.56458
AFLA_038630	cytochrome P450, putative	1.66406
AFLA_038640	fatty acid synthase alpha subunit, putative	1.66872
AFLA_038760	mandelate racemase, putative	-1.63746
AFLA_038830	hypothetical protein	3.65512
AFLA_038880	amidohydrolase family protein	2.48768
AFLA_039200	cytochrome P450, putative	4.03813
AFLA_039220	cytochrome P450, putative	-2.96396
AFLA_039230	short-chain dehydrogenase, putative	-2.03518
AFLA_039240	aristolochene synthase, putative	-2.51593
AFLA_039250	hypothetical protein	-3.4574
AFLA_039400	extracellular guanyl-specific ribonuclease RntA	-2.90786
AFLA_039520	hypothetical protein	-3.57786
AFLA_039550	glutamyl-tRNA(gln) amidotransferase subunit A, putative	-3.78841
AFLA_039560	WW domain protein	2.6429
AFLA_039680	hypothetical protein	-1.45119
AFLA_039810	DUF1212 domain membrane protein	1.01726
AFLA_039960	hypothetical protein	-1.09037
AFLA_040160	molybdopterin cofactor sulfurase, putative	2.5552
AFLA_040230	low affinity iron transporter, putative	-2.95278
AFLA_040290	hypothetical protein	2.83893
AFLA_040310	poly(A) polymerase pla1, putative	1.72938
AFLA_040330	chitin binding domain protein Peritrophin-A, putative	1.21303
AFLA_040370	membrane copper amine oxidase, putative	-7.91894
AFLA_040400	hypothetical protein	5.2223
AFLA_040960	N-hydroxyarylamine O-acetyltransferase, putative	-4.00483
AFLA_041100	hypothetical protein	-2.3825
AFLA_041150	cenp-B, putative	1.28098
AFLA_041180	hypothetical protein	5.32586
AFLA_041190	hypothetical protein	-8.19215
AFLA_041210	hypothetical protein	-4.17617
AFLA_041310	oxidoreductase, putative	-1.94495
AFLA_041350	sulfonylurea receptor/ ABC transporter, putative	-3.19206
AFLA_041370	isoflavone reductase family protein	-1.07239
AFLA_041390	hypothetical protein	-4.31877
AFLA_041450	glutamyl-tRNA(Gln) amidotransferase, subunit A	-4.66093
AFLA_041460	hypothetical protein	2.7459
AFLA_041670	hypothetical protein	-1.49501
AFLA_041680	MFS drug transporter, putative	1.31593
AFLA_041690	cysteine synthase B, putative	-1.3868
AFLA_041700	ferric-chelate reductase, putative	-1.10912
AFLA_042180	hypothetical protein	-1.20704
AFLA_042220	hypothetical protein	-2.67032
AFLA_042300	hypothetical protein	-2.97764
AFLA_042400	AMP-binding enzyme family protein	-1.93859
AFLA_042440	efflux pump antibiotic resistance protein, putative	1.27535
AFLA_042560	phytanoyl-CoA dioxygenase family protein	1.5963
AFLA_042580	short chain alcohol dehydrogenase, putative	1.05082
AFLA_042600	hypothetical protein	6.30235
AFLA_042750	hypothetical protein	2.22111
AFLA_042790	hypothetical protein	3.56144
AFLA_042890	hypothetical protein	5.4387
AFLA_043000	transmembrane protein UsgS	2.44379
AFLA_043010	formamidase FmdS	-1.95201
AFLA_043300	allantoinase Dal1, putative	2.28849
AFLA_043470	ankyrin repeat-containing protein, putative	1.90365
AFLA_043480	hypothetical protein	2.73905
AFLA_043510	protein kinase domain-containing protein	-3.63924
AFLA_043900	hypothetical protein	1.54076
AFLA_044040	amino acid permease	1.45688
AFLA_044050	gaba-specific permease, putative	1.15695
AFLA_044390	NAD binding Rossmann fold oxidoreductase, putative	1.59093
AFLA_044720	purine-cytosine permease	-3.08732
AFLA_044910	hypothetical protein	2.0059
AFLA_045050	hypothetical protein	-1.17679
AFLA_045220	oxidoreductase, putative	-9.17794
AFLA_045230	lipopolysaccharide biosynthesis protein rffA, putative	-7.71993
AFLA_045260	hypothetical protein	-4.29671
AFLA_045290	extracellular endoglucanase/cellulase, putative	-1.15137
AFLA_045520	integral membrane protein	-11.6901
AFLA_045660	multicopper oxidase/laccase, putative	-5.77249
AFLA_045830	translation initiation protein Sua5	1.51732
AFLA_045870	hypothetical protein	1.06802
AFLA_046190	nickel transport protein, putative	-4.29871
AFLA_046440	pyridoxine	-1.43455
AFLA_046670	MFS allantoate transporter, putative	1.26364
AFLA_047130	hypothetical protein	2.18837
AFLA_048970	hypothetical protein	2.21256
AFLA_049050	amidohydrolase, putative	3.92233
AFLA_049170	hypothetical protein	1.58304
AFLA_049520	hypothetical protein	-1.07064
AFLA_049590	hypothetical protein	1.6548
AFLA_049830	NCS1 allantoate transporter	-1.05652
AFLA_050120	glutaredoxin Grx1, putative	1.95836
AFLA_050220	hypothetical protein	2.02267
AFLA_050290	amidohydrolase family protein	2.23183
AFLA_050380	hypothetical protein	5.95542
AFLA_051440	fructose-bisphosphate aldolase, putative	-1.29958
AFLA_051520	hypothetical protein	-1.30482
AFLA_051900	zinc knuckle transcription factor (CnjB), putative	-1.58475
AFLA_052390	hypothetical protein	2.11511
AFLA_052650	hypothetical protein	2.2359
AFLA_052840	Ran-interacting protein Mog1, putative	-1.49339
AFLA_053080	allergen Asp F4-like, putative	1.27329
AFLA_053360	hypothetical protein	2.34009
AFLA_053480	hypothetical protein	-5.79821
AFLA_053530	zeaxanthin epoxidase, putative	4.07062
AFLA_053540	FAD binding monooxygenase, putative	-2.12098
AFLA_053650	oxidoreductase, short chain dehydrogenase/reductase family	-1.64537
AFLA_053980	DUF636 domain protein	2.14474
AFLA_054070	hypothetical protein	1.00789
AFLA_054080	Na(+)/H(+) antiporter, putative	3.0956
AFLA_054220	hypothetical protein	2.46214
AFLA_054500	penicillin-binding protein, putative	6.47139
AFLA_054960	acetamidase	-1.29711
AFLA_055680	esterase, putative	-3.00569
AFLA_055700	ATP-binding cassette transporter, putative	-1.01717
AFLA_056660	hypothetical protein	5.79381
AFLA_057030	beta-glucosidase	-1.93066
AFLA_057090	hypothetical protein	-1.30883
AFLA_057480	hypothetical protein	1.65785
AFLA_057490	hypothetical protein	-1.44358
AFLA_057500	hypothetical protein	-7.30967
AFLA_057510	monocarboxylate transporter, putative	-4.95204
AFLA_057530	S-adenosylmethionine synthetase, putative	-1.40778
AFLA_057580	hypothetical protein	-3.17856
AFLA_057900	glutathione S-transferase GST-6.0, putative	-2.7755
AFLA_058030	MFS transporter, putative	2.88773
AFLA_058090	serine/threonine protein phosphatase PP1, putative	3.66679
AFLA_058280	hypothetical protein	3.05131
AFLA_058500	WD-repeat protein, putative	1.22608
AFLA_058580	GTP cyclohydrolase II, putative	-2.27322
AFLA_058890	oxidoreductase, putative	-1.43748
AFLA_058950	spore wall maturation protein DIT1, putative	-2.52195
AFLA_058970	cytochrome P450, putative	-1.00035
AFLA_058990	bicyclomycin resistance protein, putative	-1.21124
AFLA_059000	pantothenate transporter, putative	-1.43488
AFLA_059250	class II aldolase/adducin domain protein	-4.17848
AFLA_059270	short-chain dehydrogenases/reductase, putative	-1.32521
AFLA_059410	lysophospholipase Plb3	-4.78256
AFLA_059520	hypothetical protein	-2.2084
AFLA_059660	aquaporin transporter, putative	-1.01292
AFLA_059690	hypothetical protein	4.63089
AFLA_059740	hypothetical protein	-1.85957
AFLA_059840	hypothetical protein	-2.08084
AFLA_059880	2-nitropropane dioxygenase precursor, putative	-3.8691
AFLA_059970	short-chain dehydrogenase, putative	-2.43441
AFLA_059980	choline dehydrogenase, putative	1.23057
AFLA_059990	O-methyltransferase, putative	2.37558
AFLA_060000	metallo-beta-lactamase domain protein	-7.16395
AFLA_060020	PKS-like enzyme, putative	-1.63704
AFLA_060060	hypothetical protein	-7.15932
AFLA_060080	ABC transporter, putative	1.23926
AFLA_060090	hypothetical protein	1.55897
AFLA_060130	NACHT and WD40 domain protein	-1.75102
AFLA_060480	phenazine biosynthesis protein, putative	-2.03984
AFLA_060630	hypothetical protein	1.55107
AFLA_060780	hydrophobin family protein	1.26942
AFLA_060850	multidrug resistance-associated protein, putative	3.04214
AFLA_060880	amino acid permease, putative	1.58776
AFLA_061060	hypothetical protein	-2.64607
AFLA_061070	hmg-CoA reductase, putative	-1.53439
AFLA_061110	mono- and diacylglycerol lipase precursor, putative	-4.94323
AFLA_061120	polyamine transporter, putative	-5.36803
AFLA_061140	cytochrome P450, putative	2.12831
AFLA_061280	alcohol dehydrogenase, putative	-2.93215
AFLA_061700	hypothetical protein	-1.47964
AFLA_062030	carbonic anhydrase, putative	2.01318
AFLA_062110	tRNA a64-2'-o-ribosylphosphate transferase	-1.95796
AFLA_062260	3-(3-hydroxy-phenyl)propionate hydroxylase, putative	-1.83897
AFLA_062480	hypothetical protein	1.55143
AFLA_062560	GILT family thiol reductase, putative	-2.70715
AFLA_062570	phosphatidylserine decarboxylase, putative	1.41136
AFLA_062750	hypothetical protein	-2.06112
AFLA_062800	aldo-keto reductase, putative	1.32296
AFLA_062860	polyketide synthase, putative	1.07438
AFLA_063250	glutaminyl-peptide cyclotransferase, putative	-2.18913
AFLA_063260	hypothetical protein	-13.189
AFLA_063270	hypothetical protein	-12.1401
AFLA_063290	hypothetical protein	-11.7326
AFLA_063300	hypothetical protein	-11.8431
AFLA_063330	protein phosphatase 1 regulatory inhibitor subunit 16A, putative	-12.1694
AFLA_063560	iron-sulfur domain containing protein, putative	-9.26233
AFLA_063570	monooxygenase, putative	6.16529
AFLA_063580	short chain type dehydrogenase, putative	7.76569
AFLA_063610	hypothetical protein	1.84615
AFLA_063630	1-aminocyclopropane-1-carboxylate oxidase, putative	3.43312
AFLA_063660	polysaccharide deacetylase family protein	2.75137
AFLA_064190	hypothetical protein	1.05101
AFLA_064240	nonribosomal peptide synthase, putative	-6.66425
AFLA_064280	N-methyltransferase, putative	1.22455
AFLA_064300	fructosyl amino acid oxidase, putative	-2.61564
AFLA_064340	hypothetical protein	-4.4589
AFLA_064360	ABC multidrug transporter, putative	-2.76574
AFLA_064440	transport protein, putative	-3.13113
AFLA_064600	hypothetical protein	-7.73436
AFLA_064780	hypothetical protein	-5.36608
AFLA_064800	MFS monosaccharide transporter, putative	-3.09619
AFLA_064860	nuclease S1 precursor, putative	1.68043
AFLA_065150	allantoate permease, putative	-6.00965
AFLA_065180	thioredoxin, putative	5.50208
AFLA_065260	hypothetical protein	-1.00685
AFLA_065300	protease inhibitor (Tfs1), putative	-1.54808
AFLA_065330	malate dehydrogenase, putative	1.47068
AFLA_065510	hypothetical protein	-3.14965
AFLA_065530	MFS multidrug transporter, putative	-1.5627
AFLA_065540	extracellular lipase, putative	2.29973
AFLA_065620	MFS multidrug transporter, putative	-3.87314
AFLA_065720	aldehyde dehydrogenase, putative	1.32328
AFLA_065830	hypothetical protein	1.12423
AFLA_066030	hypothetical protein	-1.58289
AFLA_066410	ATP-grasp superfamily protein	-3.41103
AFLA_066420	MSF oligopeptide transporter, putative	2.76752
AFLA_066770	oxidoreductase, FAD-binding, putative	2.35496
AFLA_066890	cytochrome P450, putative	1.70168
AFLA_066920	alcohol dehydrogenase, putative	-1.34033
AFLA_066930	cytochrome P450, putative	-1.55145
AFLA_067110	MFS peptide transporter, putative	-3.97904
AFLA_067170	hypothetical protein	1.1539
AFLA_067290	hypothetical protein	2.12155
AFLA_067320	hypothetical protein	-1.91444
AFLA_067550	1,4-beta-D-glucan-cellobiohydrolyase, putative	-2.39946
AFLA_067660	pantothenate transporter, putative	-1.41675
AFLA_068640	hypothetical protein	2.16058
AFLA_068730	ubiquitin-like modifier SUMO, putative	-1.00319
AFLA_068860	hypothetical protein	-1.25541
AFLA_069440	pyridoxal reductase (AKR8), putative	-2.05345
AFLA_069820	cellobiohydrolase, putative	1.4094
AFLA_069890	NACHT and WD40 domain protein	-1.52097
AFLA_069900	hypothetical protein	-2.49118
AFLA_070340	F-box domain protein	-1.73455
AFLA_070610	hypothetical protein	1.05916
AFLA_071150	alcohol dehydrogenase, putative	1.03839
AFLA_072730	amino acid transporter, putative	3.23106
AFLA_072780	sarcosine oxidase, putative	-3.45331
AFLA_072790	conserved hypothetical protein	-1.81612
AFLA_073220	hypothetical protein	1.97317
AFLA_073380	conserved hypothetical protein	-1.42795
AFLA_073390	3-oxoacyl-[acyl-carrier-protein] reductase, putative	6.67502
AFLA_073480	tropomyosin, putative	1.84366
AFLA_073810	serine/threonine protein kinase, putative	1.40469
AFLA_073840	Na/K ATPase alpha 1 subunit, putative	2.02996
AFLA_073930	MFS transporter, putative	2.68425
AFLA_074240	conserved hypothetical protein	1.30602
AFLA_074380	salicylate hydroxylase, putative	-4.32589
AFLA_074570	efflux pump antibiotic resistance protein, putative	3.55263
AFLA_074690	quinone oxidoreductase, putative	2.24192
AFLA_074710	3,2-trans-enoyl-CoA isomerase, putative	3.02974
AFLA_074820	conserved hypothetical protein	1.05309
AFLA_074840	amino acid transporter, putative	-2.46364
AFLA_074970	helicase, putative	-9.10655
AFLA_075110	hypothetical protein	1.43553
AFLA_075370	FAD binding domain protein	-1.32124
AFLA_075930	C4-dicarboxylate transporter/malic acid transport protein, putative	1.58571
AFLA_076110	conserved hypothetical protein	1.7768
AFLA_076320	C6 transcription factor, putative	1.61741
AFLA_076330	conserved hypothetical protein	1.49669
AFLA_076530	sugar transporter family protein	2.94706
AFLA_076870	purine permease, putative	1.93544
AFLA_076990	alpha-ketoglutarate-dependent taurine dioxygenase	2.68629
AFLA_077010	integral membrane protein, putative	1.80922
AFLA_077310	conserved hypothetical protein	-1.34164
AFLA_077470	thimet oligopeptidase, putative	-3.70853
AFLA_077590	conserved hypothetical protein	1.21044
AFLA_077770	hypothetical protein	1.21973
AFLA_077920	glutamate decarboxylase	2.14342
AFLA_077930	conserved hypothetical protein	-5.2152
AFLA_077950	toxin biosynthesis protein (Tri7), putative	-2.83517
AFLA_078040	(S)-2-haloacid dehalogenase IVA, putative	-1.43517
AFLA_078050	cytochrome P450 monooxygenase, putative	-2.35643
AFLA_078080	conserved hypothetical protein	-1.08358
AFLA_078350	conserved hypothetical protein	1.65568
AFLA_078430	aldehyde dehydrogenase family protein	3.04234
AFLA_078480	cysteine protease, putative	3.16657
AFLA_078570	conserved hypothetical protein	1.21147
AFLA_078590	extracellular matrix protein, putative	3.94648
AFLA_078690	RNA interference and gene silencing protein (Qde2), putative	-1.23682
AFLA_079320	conserved hypothetical protein	-1.10993
AFLA_079330	amino acid transporter, putative	2.19937
AFLA_079340	dienelactone hydrolase, putative	5.50425
AFLA_079380	NRPS-like enzyme, putative	6.05397
AFLA_079510	MFS transporter, putative	2.94002
AFLA_079520	conserved hypothetical protein	3.15482
AFLA_079600	acyl-CoA:6-aminopenicillanic-acid-acyltransferase, putative	-1.43737
AFLA_080180	hypothetical protein	1.48344
AFLA_080500	cation-transporting ATPase, putative	-3.19558
AFLA_080560	conserved hypothetical protein	6.18396
AFLA_080990	MFS sugar transporter, putative	3.82984
AFLA_081070	conserved hypothetical protein	2.16679
AFLA_081690	hypothetical protein	1.38435
AFLA_081770	conserved hypothetical protein	-1.39736
AFLA_081820	glycosyl hydrolase, putative	-4.77605
AFLA_081930	conserved hypothetical protein	-1.00741
AFLA_081980	ferulic acid esterase (FaeA), putative	2.20572
AFLA_081990	conserved hypothetical protein	3.31102
AFLA_082360	conserved hypothetical protein	1.9847
AFLA_082430	conserved hypothetical protein	1.04515
AFLA_082460	conserved hypothetical protein	1.51911
AFLA_082700	conserved hypothetical protein	-5.71565
AFLA_082730	conserved hypothetical protein	1.64738
AFLA_082770	conserved hypothetical protein	1.64285
AFLA_082850	C2H2 type conidiation transcription factor BrlA	1.001
AFLA_082890	ribonuclease T2, putative	-2.37438
AFLA_082940	conserved hypothetical protein	-1.26374
AFLA_082970	monocarboxylate permease homolog, mch4, putative	2.90461
AFLA_083120	thioredoxin, putative	-1.82203
AFLA_083390	conserved hypothetical protein	-1.57963
AFLA_083610	glutathione S-transferase, putative	-1.18048
AFLA_083800	conserved hypothetical protein	1.57152
AFLA_084010	lactam utilization protein LamB	1.26547
AFLA_084090	C6 transcription factor, putative	2.31185
AFLA_084860	conserved hypothetical protein	-1.94204
AFLA_085020	class II aldolase/adducin domain protein	3.62591
AFLA_085200	camp independent regulatory protein	1.61548
AFLA_085610	sulfur metabolite repression control protein, putative	-1.9896
AFLA_085700	arsenate reductase (Arc2), putative	3.31043
AFLA_085960	cell surface protein, putative	-1.86626
AFLA_086540	glycine-rich RNA-binding protein, putative	-1.75452
AFLA_086560	short-chain dehydrogenase/reductase family protein, putative	-1.26725
AFLA_086650	conserved hypothetical protein	-1.26372
AFLA_087060	GMC oxidoreductase, putative	3.86302
AFLA_087070	DUF1338 domain protein	-4.08446
AFLA_087190	hypothetical protein	2.14852
AFLA_087320	GABA permease GabA	-1.75643
AFLA_087380	isochorismatase family hydrolase, putative	1.6258
AFLA_087390	conserved hypothetical protein	1.00063
AFLA_087470	plasma membrane low affinity zinc ion transporter, putative	1.60956
AFLA_087620	NmrA family transcriptional regulator, putative	2.37982
AFLA_087640	alpha,alpha-trehalose phosphate synthase subunit, putative	-2.42147
AFLA_088100	purine-cytosine permease, putative	-1.58318
AFLA_089450	GABA permease, putative	-1.02285
AFLA_089500	plasma membrane calcium-transporting ATPase, putative	-2.42578
AFLA_089510	vacuolar calcium ion transporter, putative	-2.84913
AFLA_089520	vacuolar calcium ion transporter, putative	-2.95944
AFLA_089540	hypothetical protein	-2.32551
AFLA_089740	short-chain dehydrogenase, putative	2.24205
AFLA_090020	oligopeptide transporter, putative	-1.54946
AFLA_090060	aspergillopepsin, putative	3.16887
AFLA_090180	alpha/beta hydrolase, putative	-1.03929
AFLA_090220	integral membrane protein	2.95756
AFLA_090670	hypothetical protein	-4.91354
AFLA_090750	AMID-like mitochondrial oxidoreductase, putative	-2.25056
AFLA_091070	hypothetical protein	-3.73118
AFLA_091620	hypothetical protein	-2.63661
AFLA_091650	GPI anchored protein, putative	-1.1926
AFLA_091710	C6 finger domain protein, putative	-1.22633
AFLA_091780	hypothetical protein	3.35585
AFLA_092190	hypothetical protein	-1.05405
AFLA_092230	sugar transporter, putative	1.23954
AFLA_092300	hypothetical protein	4.15204
AFLA_093000	MFS efflux transporter, putative	-1.87782
AFLA_094120	hypothetical protein	-1.08305
AFLA_094270	hypothetical protein	-2.82367
AFLA_094280	agmatinase, putative	1.43602
AFLA_094300	hypothetical protein	2.66621
AFLA_094320	ankyrin repeat domain, putative	4.28854
AFLA_094450	aspartic endopeptidase Pep1/aspergillopepsin F	2.15557
AFLA_094580	hypothetical protein	-4.37384
AFLA_095120	efflux pump antibiotic resistance protein, putative	-2.75161
AFLA_095430	hypothetical protein	5.48424
AFLA_095560	hypothetical protein	1.16167
AFLA_095630	FAD dependent oxidoreductase superfamily	-2.17864
AFLA_096010	hypothetical protein	1.01562
AFLA_096050	protein RDR1, putative	-1.14378
AFLA_096380	FAD dependent oxidoreductase, putative	-10.6803
AFLA_097260	dynamin family GTPase, putative	-2.13821
AFLA_097290	hypothetical protein	1.46448
AFLA_097320	hypothetical protein	-1.69416
AFLA_097570	4-hydroxy-2-oxovalerate aldolase, putative	-2.52322
AFLA_097610	gluconolactonase precursor, putative	3.08046
AFLA_097650	hypothetical protein	5.00004
AFLA_097730	hexose carrier protein, putative	2.85734
AFLA_097770	hypothetical protein	1.72402
AFLA_097870	hypothetical protein	1.03406
AFLA_097940	AhpC/TSA family thioredoxin peroxidase, putative	-2.31184
AFLA_098210	hypothetical protein	1.41532
AFLA_098380	conidial hydrophobin RodA/RolA	-4.06354
AFLA_098570	sterol isomerase, putative	-3.55315
AFLA_098600	hypothetical protein	1.28385
AFLA_098620	hypothetical protein	2.84534
AFLA_098700	carbonyl reductase, putative	1.16269
AFLA_098840	L-amino acid oxidase, putative	3.52965
AFLA_098910	hypothetical protein	3.70958
AFLA_099050	hypothetical protein	3.63795
AFLA_099110	hypothetical protein	-1.5567
AFLA_099150	thioredoxin m(mitochondrial)-type, putative	2.38196
AFLA_099340	hypothetical protein	-1.25684
AFLA_099750	epoxide hydrolase, putative	1.9514
AFLA_100280	MFS transporter, putative	-4.11494
AFLA_100290	aliphatic nitrilase, putative	3.59992
AFLA_100300	C6 transcription factor, putative	2.26738
AFLA_100400	hypothetical protein	1.33785
AFLA_100540	oxidoreductase, putative	3.1775
AFLA_100610	hypothetical protein	1.99647
AFLA_100680	hypothetical protein	-1.04081
AFLA_100980	hypothetical protein	1.76538
AFLA_101130	C2H2 zinc finger domain protein, putative	-1.12079
AFLA_101350	hypothetical protein	1.37404
AFLA_101550	thioredoxin reductase, putative	-5.31938
AFLA_101740	glycerophosphoinositol/ glycerophosphocholine transporter, putative	-6.86677
AFLA_101750	molybdopterin synthase small subunit CnxG	1.52631
AFLA_101920	extracellular developmental signal biosynthesis protein FluG	1.75586
AFLA_102050	DEAD/DEAH box RNA helicase, putative	-2.97605
AFLA_102070	hypothetical protein	3.01197
AFLA_102090	phosphopantothenate-cysteine ligase, putative	1.37245
AFLA_102230	hypothetical protein	1.0361
AFLA_102250	PKS-like enzyme, putative	-2.96349
AFLA_102390	hypothetical protein	-2.2827
AFLA_102590	hypothetical protein	1.81858
AFLA_102640	exo-beta-1,3-glucanase, putative	1.39593
AFLA_102690	hypothetical protein	-1.92334
AFLA_102780	WD-repeat protein, putative	-1.90968
AFLA_103010	dsDNA-binding protein PDCD5, putative	3.01151
AFLA_103580	serum paraoxonase/arylesterase family protein	1.17665
AFLA_104350	dynamin, putative	1.33109
AFLA_104420	hypothetical protein	-2.91816
AFLA_104510	methyltransferase family protein	-2.43469
AFLA_104520	hypothetical protein	-2.12075
AFLA_104550	hypothetical protein	-1.38003
AFLA_104620	arrestin domain containing protein, putative	-6.55006
AFLA_104640	Asp hemolysin-like protein	1.43564
AFLA_104700	monoxygenase, putative	-1.21112
AFLA_104740	2-hydroxyhepta-2,4-diene-1,7-dioate isomerase, putative	1.96838
AFLA_104750	pantothenate transporter, putative	-2.65163
AFLA_104800	hypothetical protein	-1.91735
AFLA_104970	hypothetical protein	-1.32823
AFLA_105060	NAD dependent epimerase/dehydratase, putative	1.66214
AFLA_105330	hypothetical protein	-1.41842
AFLA_105600	hypothetical protein	-1.16536
AFLA_106230	carboxylesterase, putative	-1.77589
AFLA_107140	hypothetical protein	1.06801
AFLA_107300	3-hydroxyanthranilate 3,4-dioxygenase Bna1, putative	1.89705
AFLA_107560	oxidoreductase, 2OG-Fe(II) oxygenase family, putative	-4.95036
AFLA_107610	NmrA-like family protein	1.7154
AFLA_108000	hypothetical protein	3.32176
AFLA_108040	hypothetical protein	2.33933
AFLA_108050	hypothetical protein	-3.06281
AFLA_108060	short-chain dehydrogenase, putative	1.4988
AFLA_108210	hypothetical protein	2.85932
AFLA_108240	amidohydrolase, putative	1.55975
AFLA_108260	ammonium transporter, putative	1.5878
AFLA_108280	hypothetical protein	-1.26919
AFLA_108310	hypothetical protein	-2.28959
AFLA_108330	carboxy-cis,cis-muconate cyclase, putative	1.95211
AFLA_108430	hypothetical protein	1.96413
AFLA_108690	hypothetical protein	-1.84369
AFLA_108710	quinone oxidoreductase, putative	2.2696
AFLA_108810	pyridoxamine phosphate oxidase family protein	3.71207
AFLA_109150	C2H2 finger domain protein (Ezf), putative	1.04876
AFLA_109160	isopentenyl-diphosphate delta-isomerase	1.98614
AFLA_109220	C6 transcription factor, putative	-1.38897
AFLA_109230	2-hydroxyacid dehydrogenase, putative	-2.43429
AFLA_109520	zinc-iron transporter, putative	1.76916
AFLA_109760	ankyrin, putative	-2.33413
AFLA_109800	dynamin GTPase, putative	-2.77798
AFLA_110040	cupin domain protein	1.70782
AFLA_110180	hypothetical protein	2.06708
AFLA_110390	hypothetical protein	1.57989
AFLA_110480	molybdenum cofactor sulfurase protein (HxB), putative	2.17281
AFLA_110690	cytochrome c peroxidase Ccp1, putative	-2.90073
AFLA_111190	acyl-CoA dehydrogenase, putative	-2.55478
AFLA_111350	C-14 sterol reductase, putative	-1.24578
AFLA_111570	salicylate hydroxylase, putative	1.38135
AFLA_111800	ornithine decarboxylase	2.18133
AFLA_112480	3-oxo-5-alpha-steroid 4-dehydrogenase family protein	-1.39942
AFLA_112830	hypothetical protein	2.14696
AFLA_112880	2,4-dichlorophenol 6-monooxygenase, putative	-1.03117
AFLA_112890	MFS transporter, putative	4.50079
AFLA_113380	hypothetical protein	2.57356
AFLA_113520	alpha/beta hydrolase, putative	-6.32617
AFLA_113590	hypothetical protein	1.5703
AFLA_114080	disrupter of telomere silencing protein Dot5, putative	-4.2936
AFLA_114400	cation efflux protein/ zinc transporter, putative	-1.19726
AFLA_114750	glutamyl-tRNA(Gln) amidotransferase subunit A, putative	-6.97548
AFLA_114810	cytochrome P450, putative	2.57798
AFLA_114820	polyketide synthase, putative	-1.1091
AFLA_116130	hypothetical protein	1.39706
AFLA_116150	integral membrane protein	-2.9874
AFLA_116170	hypothetical protein	-3.37758
AFLA_116270	paraoxonase, putative	-4.01178
AFLA_116390	amino acid transporter, putative	1.33455
AFLA_116460	hypothetical protein	3.50398
AFLA_116610	hypothetical protein	1.10948
AFLA_116670	4-hydroxy-2-oxovalerate aldolase, putative	-4.07832
AFLA_116940	hypothetical protein	1.04677
AFLA_117030	hypothetical protein	3.93132
AFLA_117520	hypothetical protein	-2.83858
AFLA_117900	thermolabile L-asparaginase, putative	4.32061
AFLA_118030	hypothetical protein	4.68865
AFLA_118060	dihydroflavonal-4-reductase, putative	3.6357
AFLA_118120	hscarg dehydrogenase, putative	2.25768
AFLA_118190	ganglioside induced differentiation associated protein, putative	2.20544
AFLA_118210	nucleoside-diphosphate-sugar epimerase, putative	1.63282
AFLA_118370	hypothetical protein	-2.16238
AFLA_118730	glycerol dehydrogenase (GCY1), putative	1.8246
AFLA_118830	hypothetical protein	-2.5523
AFLA_118960	polyketide synthase, putative	2.84305
AFLA_119150	hypothetical protein	-4.01575
AFLA_119560	pyridoxamine phosphate oxidase, putative	-1.19947
AFLA_119640	cofilin	-5.07597
AFLA_119800	hypothetical protein	5.68937
AFLA_119830	MFS multidrug transporter, putative	-6.53827
AFLA_120210	hypothetical protein	-1.18568
AFLA_120300	kinesin light chain, putative	2.28288
AFLA_120380	tyrosinase, putative	-1.76722
AFLA_120570	short-chain dehydrogenase, putative	-2.16182
AFLA_120930	glycosyl transferase, putative	-2.69599
AFLA_120940	glycan biosynthesis protein (PigL), putative	-2.4704
AFLA_120950	glycosyl transferase, putative	-3.5228
AFLA_120980	zinc finger protein, putative	-2.25369
AFLA_121000	hypothetical protein	-3.57996
AFLA_121010	integral membrane protein	-2.58855
AFLA_121230	L-amino acid oxidase LaoA	-1.18185
AFLA_121250	hypothetical protein	-4.33822
AFLA_121280	hypothetical protein	2.82002
AFLA_121290	hypothetical protein	3.14115
AFLA_121370	1,3-beta-glucanosyltransferase, putative	-2.45335
AFLA_121450	trihydroxytoluene oxygenase	-4.69262
AFLA_121910	hypothetical protein	1.53285
AFLA_122110	bifunctional catalase-peroxidase Cat2	1.76465
AFLA_122140	hypothetical protein	6.32848
AFLA_122200	hypothetical protein	-2.18607
AFLA_122220	aminotriazole resistance protein, putative	1.55298
AFLA_122310	esterase, putative	-2.59116
AFLA_122330	allantoate permease, putative	1.81711
AFLA_122470	CobW domain protein	1.58347
AFLA_122480	extracellular exo-polygalacturonase, putative	6.86465
AFLA_122540	hypothetical protein	10.6184
AFLA_122740	AMP deaminase Amd1, putative	1.30619
AFLA_123140	uracil permease, putative	-2.92732
AFLA_123230	ketoreductase, putative	-1.09967
AFLA_123280	hypothetical protein	3.63363
AFLA_123710	fatty acid repression mutant protein, putative	-2.92218
AFLA_123790	srpk, putative	-2.76183
AFLA_123860	cytochrome P450, putative	1.22854
AFLA_124270	hypothetical protein	3.85932
AFLA_124300	hypothetical protein	-2.34268
AFLA_124400	PQ loop repeat protein	1.49528
AFLA_124420	amine oxidase, putative	-10.3622
AFLA_124560	hypothetical protein	6.14242
AFLA_124670	valacyclovir hydrolase, putative	-1.51958
AFLA_124780	efflux pump antibiotic resistance protein, putative	-2.91097
AFLA_124790	GNAT family acetyltransferase, putative	1.22968
AFLA_124800	hypothetical protein	7.99391
AFLA_124820	hypothetical protein	4.1408
AFLA_124890	hypothetical protein	3.77305
AFLA_125040	hypothetical protein	2.33321
AFLA_125060	epimerase/dehydratase family protein, putative	-3.56032
AFLA_125070	efflux pump antibiotic resistance protein, putative	-3.89063
AFLA_125610	hypothetical protein	3.99259
AFLA_125650	hypothetical protein	1.10615
AFLA_125660	H /K ATPase alpha subunit, putative	1.13312
AFLA_125760	squalene-hopene-cyclase, putative	5.15469
AFLA_125770	LysR family regulatory protein, putative	-9.32546
AFLA_125780	ATP-binding cassette transporter, putative	-9.49787
AFLA_125920	hypothetical protein	-11.9759
AFLA_125980	hypothetical protein	-3.86479
AFLA_126010	hypothetical protein	1.72906
AFLA_126070	hypothetical protein	3.36284
AFLA_126180	sugar transporter, putative	2.33219
AFLA_126450	eukaryotic translation initiation factor 3 subunit, putative	2.73916
AFLA_126670	hypothetical protein	1.42535
AFLA_126680	WD repeat-containing protein, putative	1.73024
AFLA_126690	hypothetical protein	-6.68976
AFLA_126710	polyketide synthase, putative	-4.22567
AFLA_126730	hypothetical protein	-5.29742
AFLA_126750	extracellular glycine-rich protein	-2.62921
AFLA_126800	hypothetical protein	-3.34325
AFLA_126980	hypothetical protein	1.01852
AFLA_127000	hypothetical protein	-1.85428
AFLA_127030	hypothetical protein	1.76188
AFLA_127290	zinc metallopeptidase, putative	1.47778
AFLA_127740	metacaspase CasA	2.17273
AFLA_128150	C6 transcription factor, putative	-1.16012
AFLA_128270	hypothetical protein	-4.50256
AFLA_128340	hypothetical protein	-1.2495
AFLA_128550	proline utilization protein PrnX, putative	-2.48288
AFLA_128680	flavin-binding monooxygenase, putative	4.6347
AFLA_128690	hypothetical protein	1.26566
AFLA_128970	hypothetical protein	-1.27389
AFLA_128980	hypothetical protein	-1.25427
AFLA_129050	hypothetical protein	-1.39489
AFLA_129220	hypothetical protein	-2.49002
AFLA_129240	short-chain dehydrogenase, putative	1.83642
AFLA_129250	glucose dehydrogenase, putative	-1.23456
AFLA_129290	hypothetical protein	-2.10728
AFLA_129430	vacuolar H+\/Ca2+ exchanger	1.47392
AFLA_129450	MFS transporter, putative	-4.51201
AFLA_129790	hypothetical protein	2.78967
AFLA_131500	hypothetical protein	3.38469
AFLA_131640	HLH transcription factor (Hpa3), putative	1.6457
AFLA_131740	aromatic ring-opening dioxygenase LigB subunit, putative	-1.3625
AFLA_131860	hypothetical protein	-2.37946
AFLA_131910	hypothetical protein	1.15954
AFLA_131920	hypothetical protein	-1.0597
AFLA_131990	MFS monocarboxylate transporter, putative	-3.15594
AFLA_132000	DUF829 domain protein (PaxU), putative	-3.60185
AFLA_132230	hypothetical protein	2.15795
AFLA_132260	hypothetical protein	2.71462
AFLA_132360	glial factor naturation factor, putative	-3.42584
AFLA_132750	hypothetical protein	-1.0834
AFLA_132850	asparaginase family protein	1.1566
AFLA_132890	actin cytoskeleton organization protein (Cro1), putative	1.18508
AFLA_133830	alcohol dehydrogenase, putative	-1.13271
AFLA_133910	tyrosyl-DNA phosphodiesterase, putative	-5.41998
AFLA_134380	hypothetical protein	1.4938
AFLA_134500	hypothetical protein	-1.26717
AFLA_134760	hypothetical protein	5.01703
AFLA_135310	hypothetical protein	-1.27455
AFLA_135510	feruloyl esterase, putative	-2.37248
AFLA_135600	hypothetical protein	1.97205
AFLA_136090	MFS transporter, putative	1.67154
AFLA_136300	hypothetical protein	-1.92708
AFLA_136340	aminotransferase family protein (LolT), putative	1.29629
AFLA_136350	hypothetical protein	-1.01622
AFLA_136370	alcohol dehydrogenase, putative	2.02109
AFLA_136460	DRAP deaminase, putative	2.99271
AFLA_137070	allantoate permease, putative	1.07534
AFLA_137150	hypothetical protein	-1.00915
AFLA_137260	hypothetical protein	1.57044
AFLA_137500	short-chain dehydrogenase, putative	1.9767
AFLA_137710	hypothetical protein	-5.35743
AFLA_137730	hypothetical protein	1.99272
AFLA_137770	UMTA methyltransferase family protein	-2.10958
AFLA_137780	ABC transporter, putative	-1.6623
AFLA_137840	integral membrane protein	7.07607
AFLA_137850	hypothetical protein	-2.10486
AFLA_137860	hypothetical protein	-1.3072
AFLA_137870	polyketide synthase, putative	-2.84594
AFLA_138060	c-24(28) sterol reductase	-1.15053
AFLA_138120	hypothetical protein	-2.25728
AFLA_138230	6-hydroxy-D-nicotine oxidase, putative	-2.0861
AFLA_138240	mannan endo-1,6-alpha-mannosidase DCW1 precursor, putative	1.59673
AFLA_138350	hypothetical protein	2.28701
AFLA_138400	NAD dependent epimerase/dehydratase, putative	7.33524
AFLA_138570	protease S8 tripeptidyl peptidase I, putative	-1.51908
AFLA_138710	choline transport protein, putative	5.43588
AFLA_138790	hypothetical protein	-4.70156
AFLA_138800	hypothetical protein	1.25638
AFLA_138830	hypothetical protein	-7.79446
AFLA_139050	hypothetical protein	-7.21407
		3.56346
